# Supplementary material for: Biological and therapeutic implications of multisector sequencing in newly diagnosed glioblastoma
Source: Oxford University Press journal article supplement (doi:10.1093/neuonc/nox232), 2017-12-13

Figure S1A

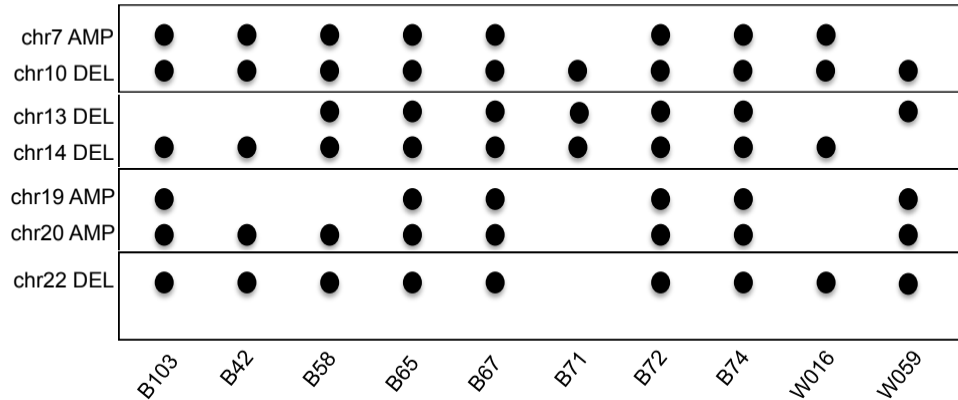

Figure S1B

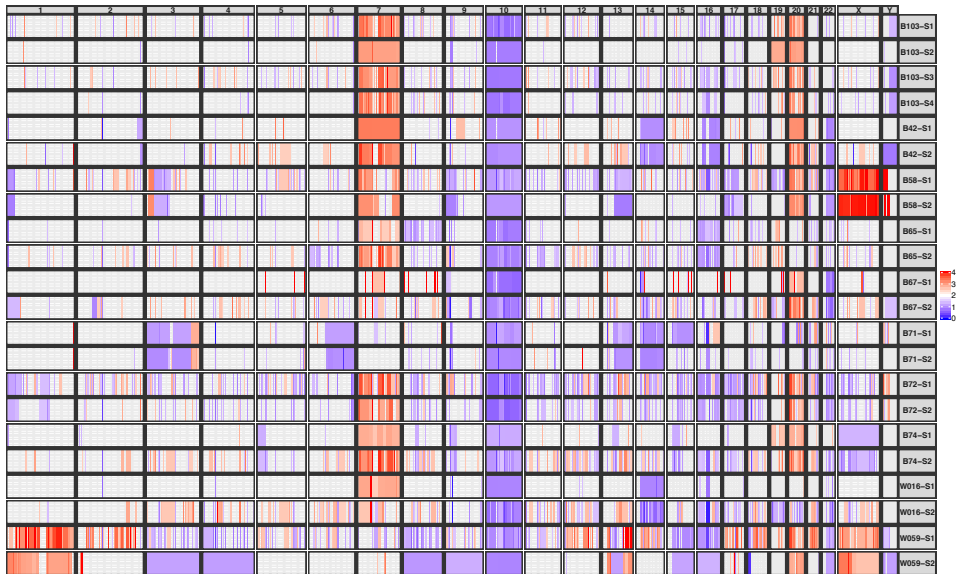



Figure S3

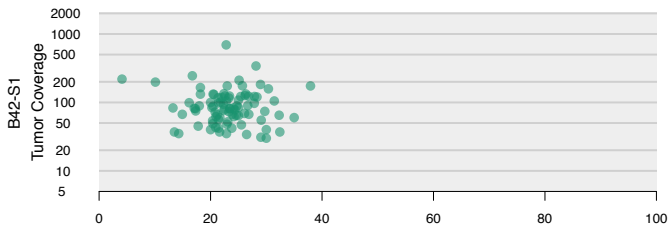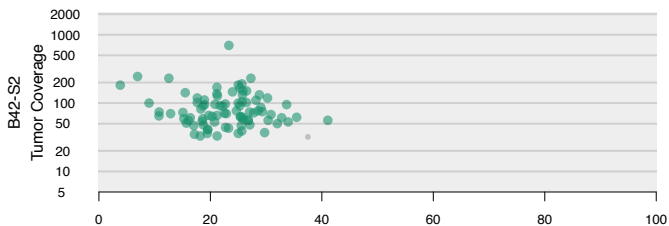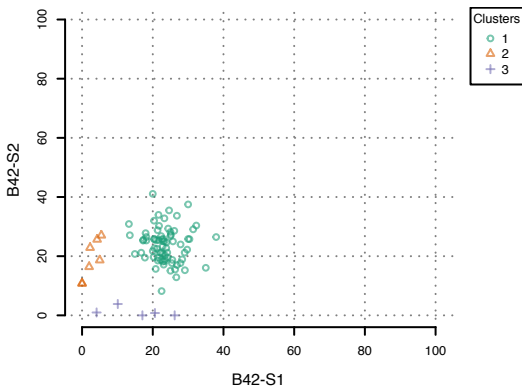

Figure S3

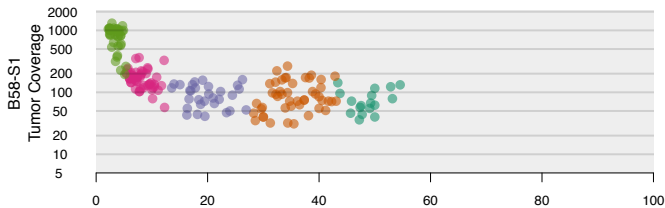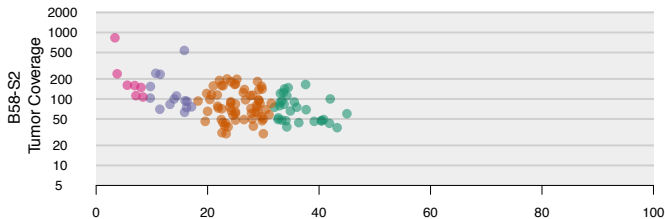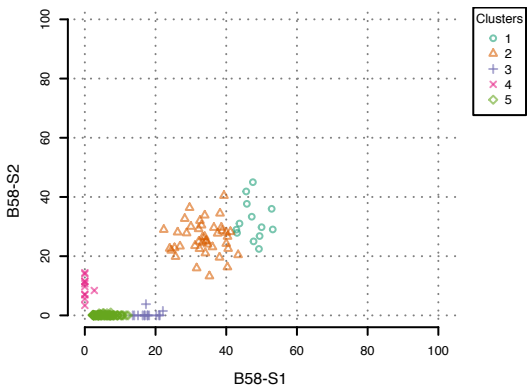

Figure S3

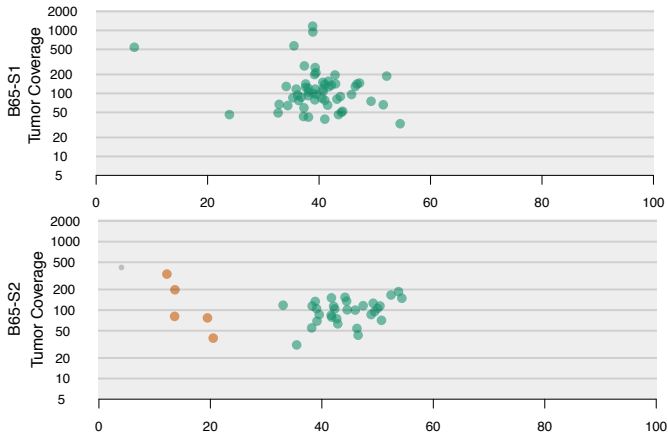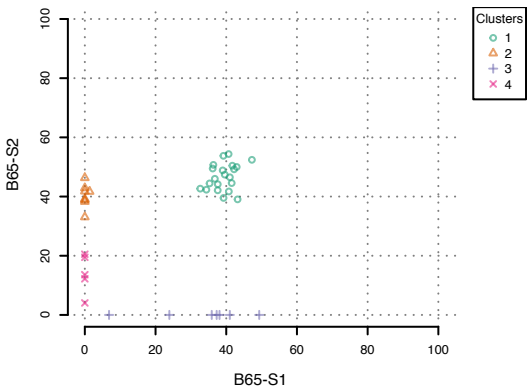

Figure S3

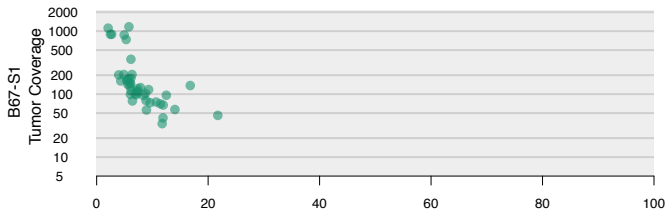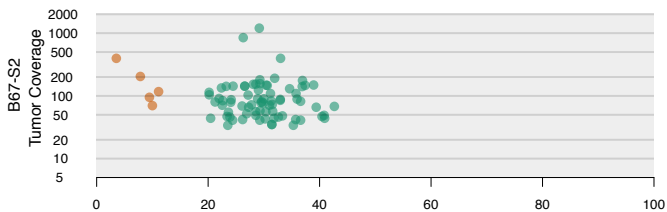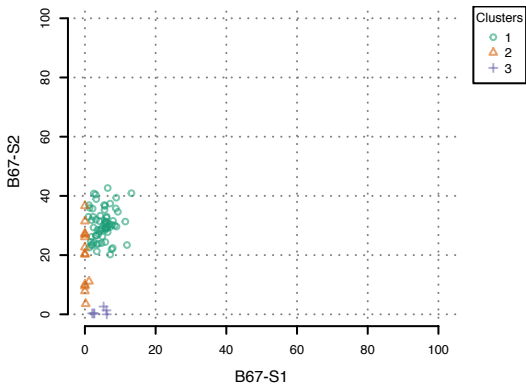

Figure S3

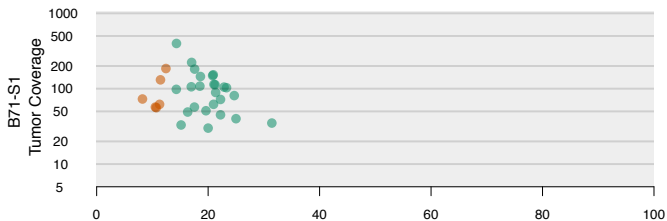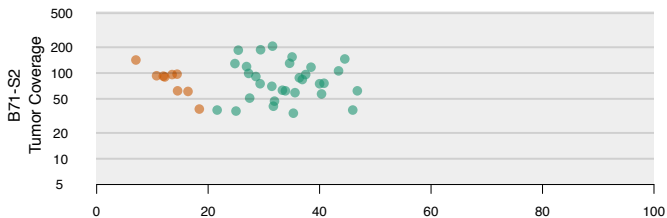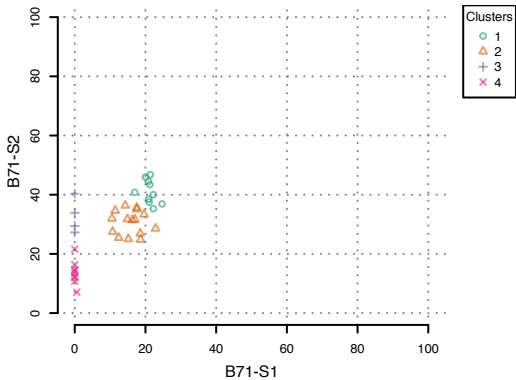



Figure S3

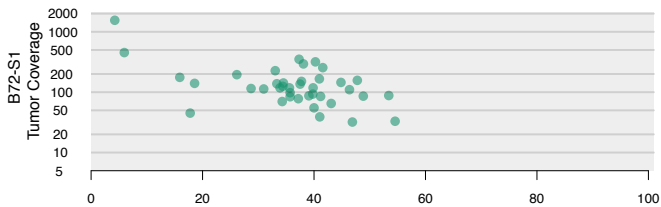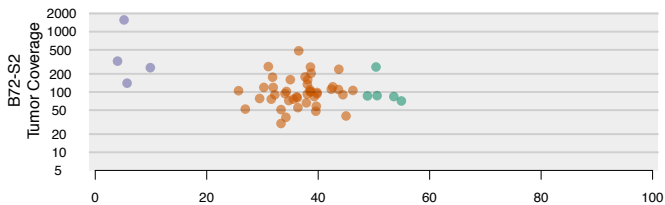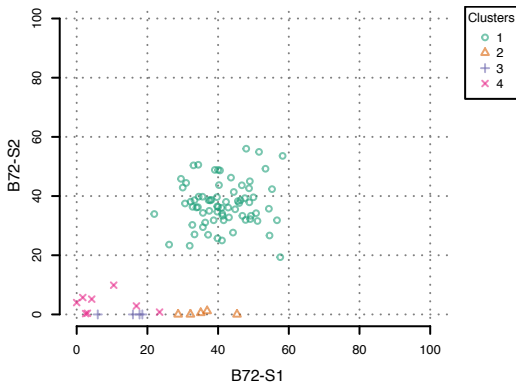

Figure S3

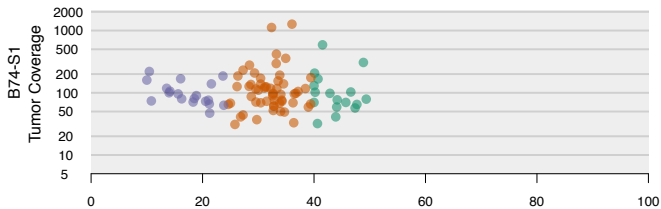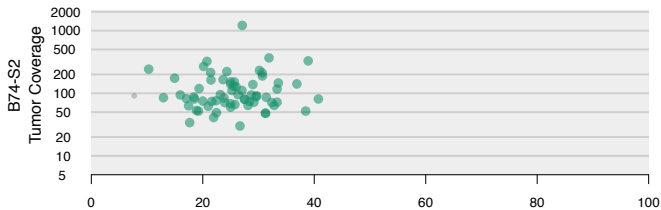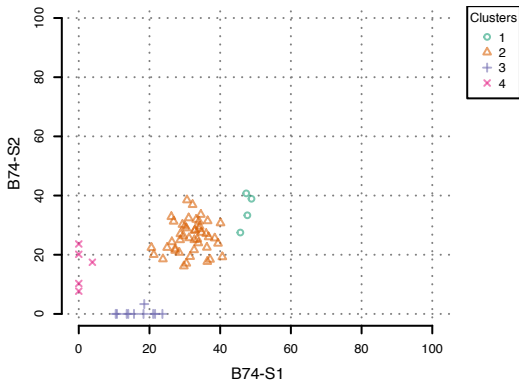

Figure S3

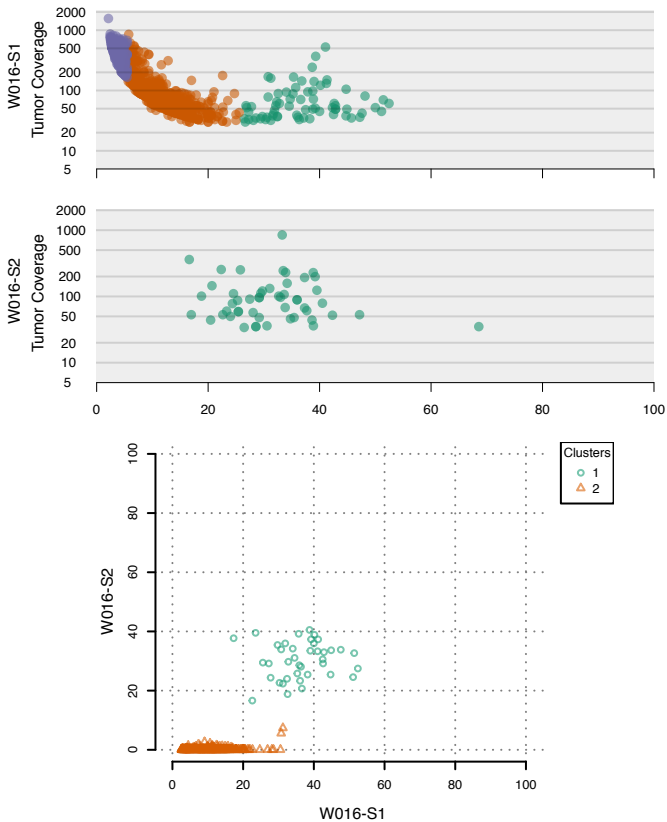

Figure S3

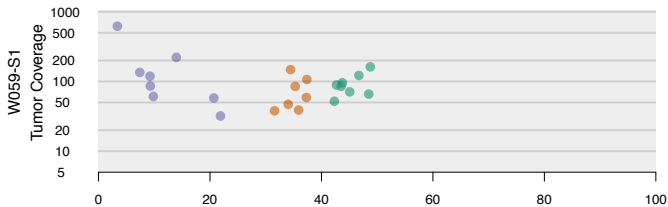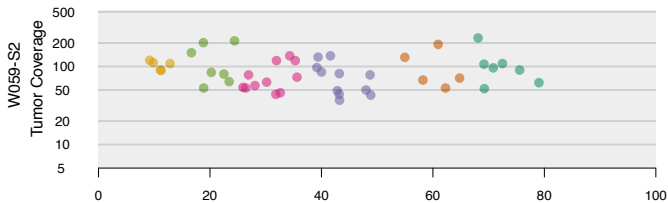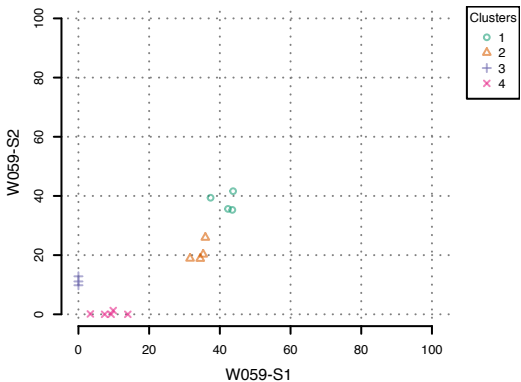

Figure S3

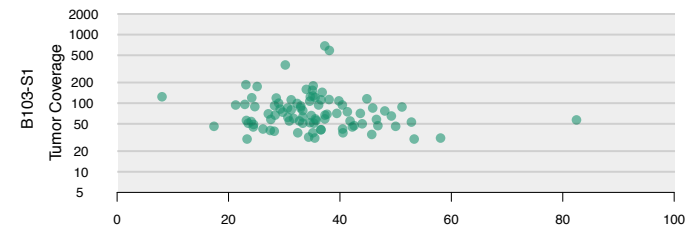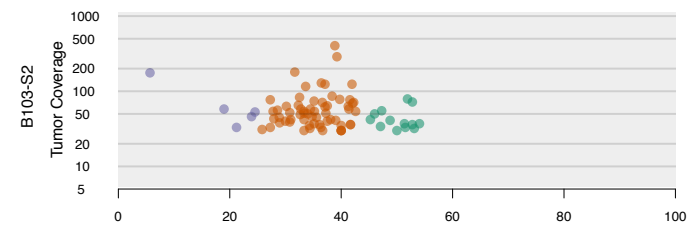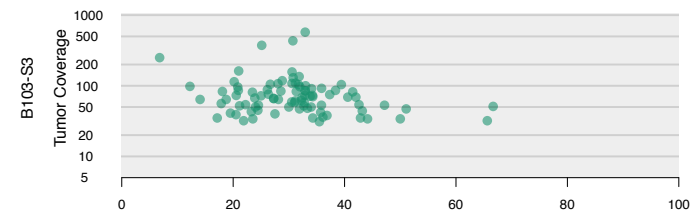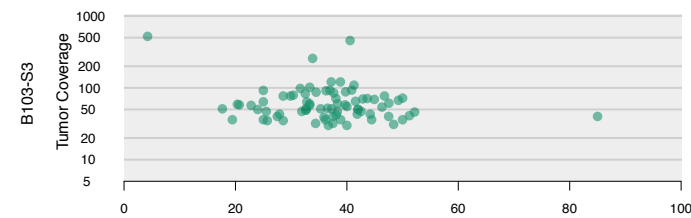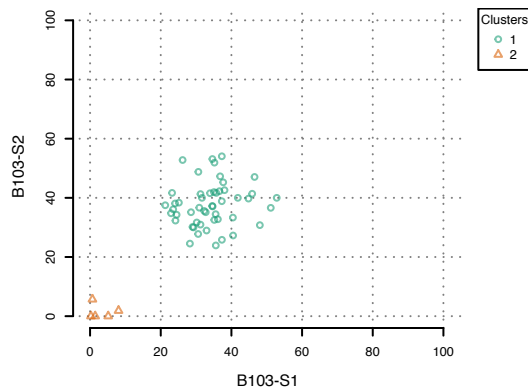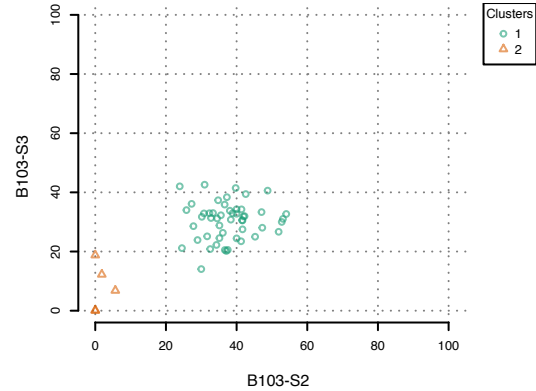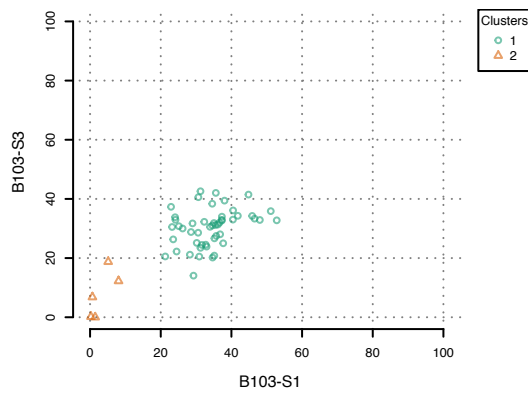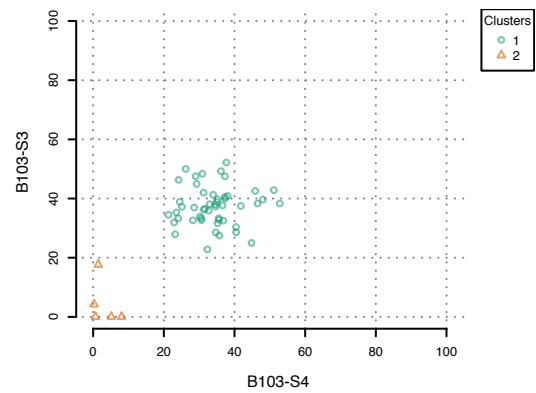

Figure S4

B103

Max (clone cross-sample  $p$ ) = 0

B103.S1.vaf

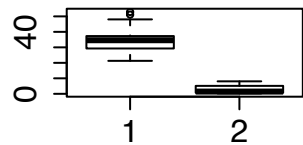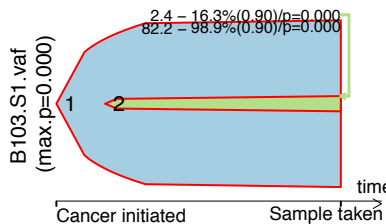

B103.S2.vaf

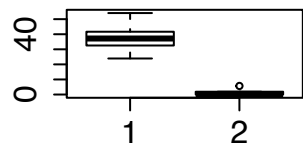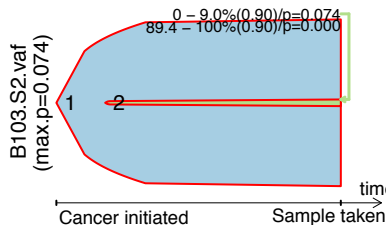

B103.S3.vaf

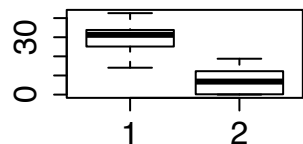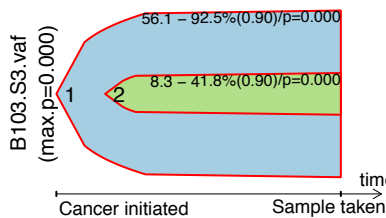

B103.S4.vaf

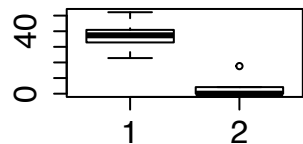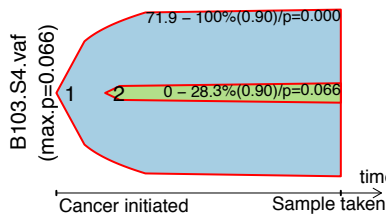

1  
\*H\_SU.B103.S1.vaf  
\*H\_SU.B103.S2.vaf  
\*H\_SU.B103.S3.vaf  
\*H\_SU.B103.S4.vaf

2  
H\_SU.B103.S1.vaf  
H\_SU.B103.S2.vaf  
H\_SU.B103.S3.vaf  
H\_SU.B103.S4.vaf

\* sample founding clone  
o zero cellular fraction  
o\* ancestor of sample founding clone

B42

Max (clone cross-sample p) = 0.004

Figure S4

○ group1

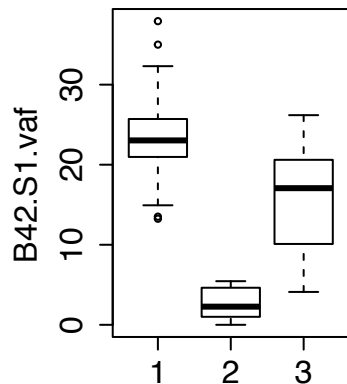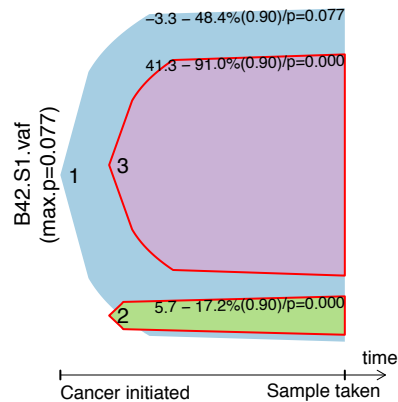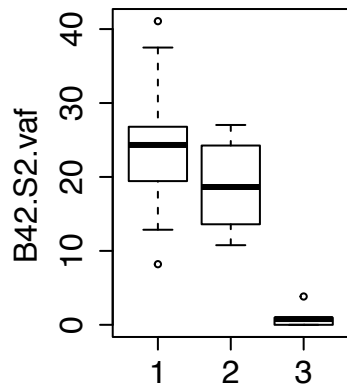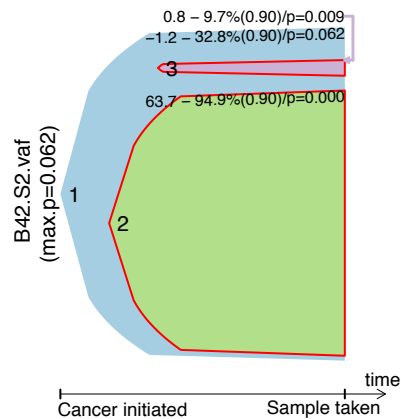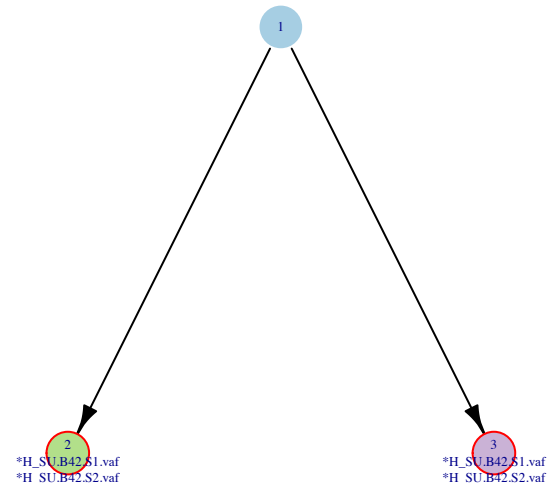

\* sample founding clone  
 ○ zero cellular fraction  
 ○\* ancestor of sample founding clone

B58

Max (clone cross-sample p) = 0

Figure S4

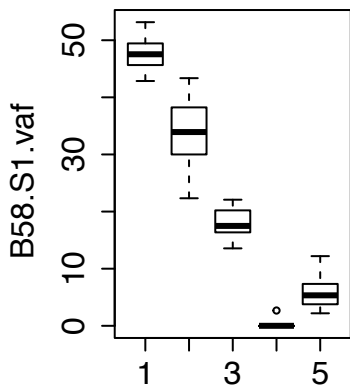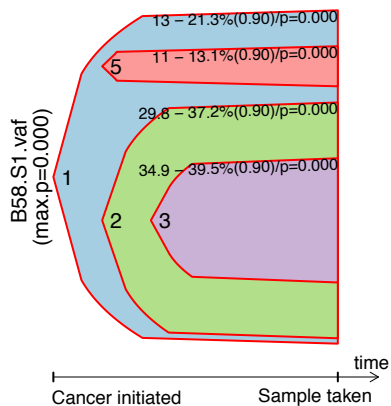

○ group1

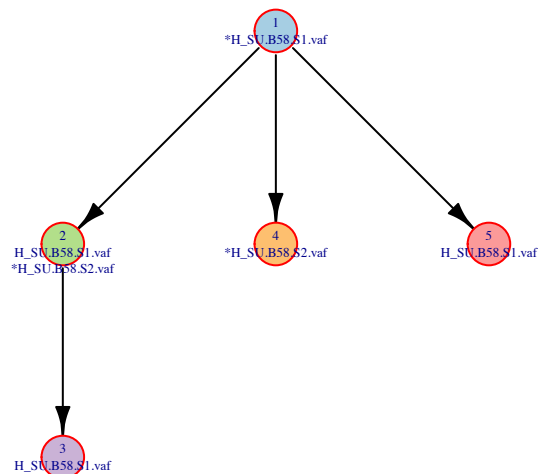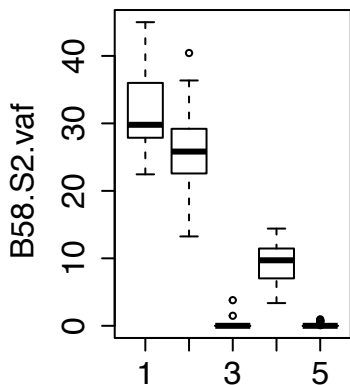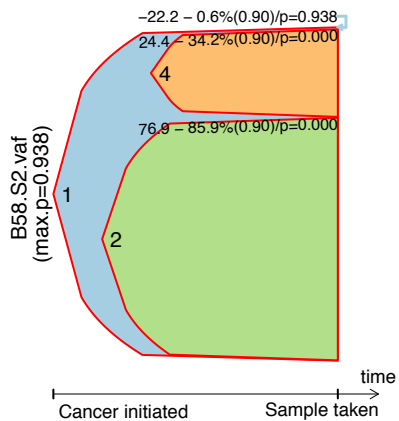

\* sample founding clone  
 ○ zero cellular fraction  
 ○\* ancestor of sample founding clone



B58

Max (clone cross-sample p) = 0

Figure S4

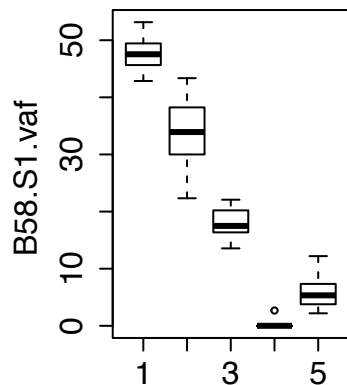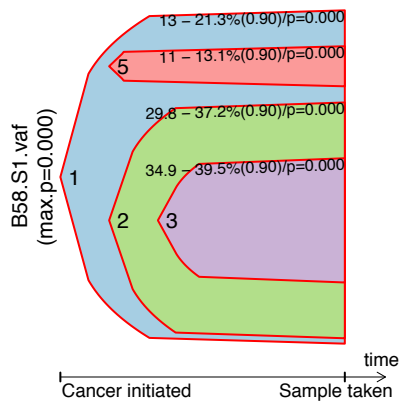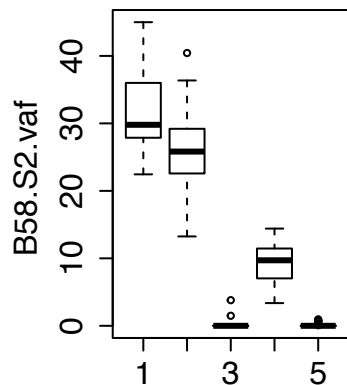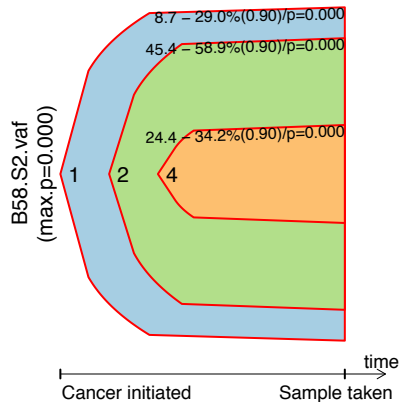

○ group1

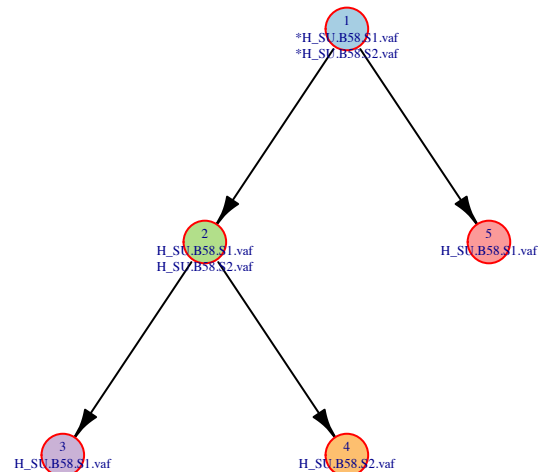

\* sample founding clone  
 ○ zero cellular fraction  
 ○\* ancestor of sample founding clone

B58

Max (clone cross-sample p) = 0

Figure S4

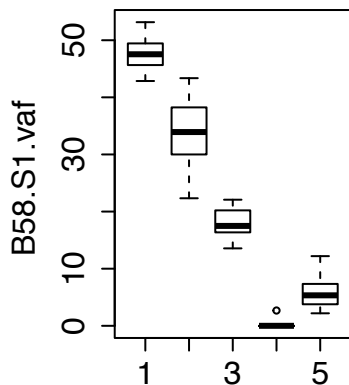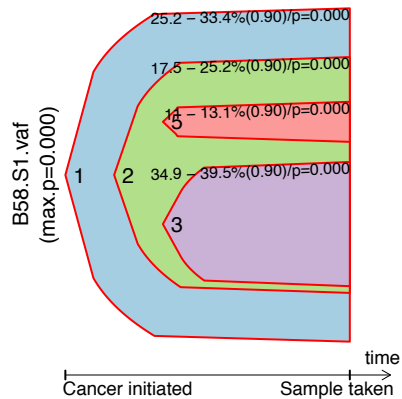

○ group1

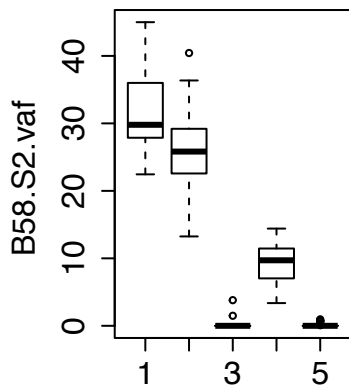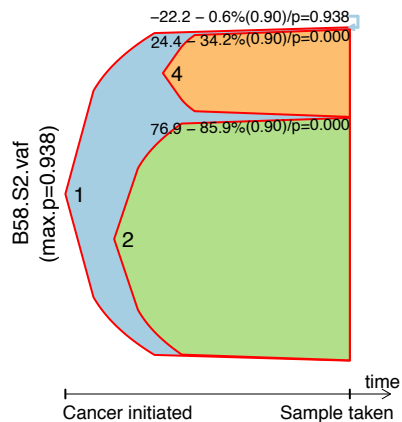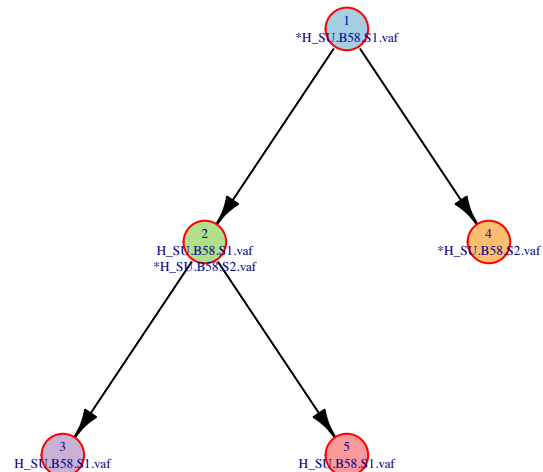

\* sample founding clone  
 ○ zero cellular fraction  
 ○\* ancestor of sample founding clone

B58

Max (clone cross-sample p) = 0

Figure S4

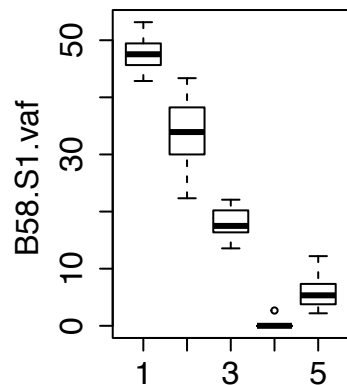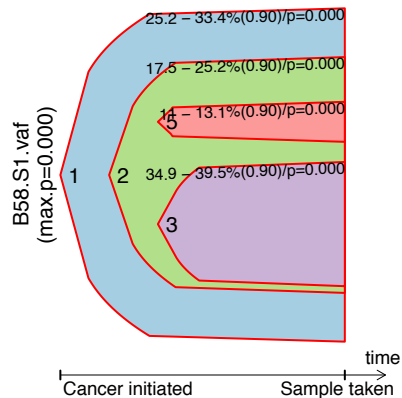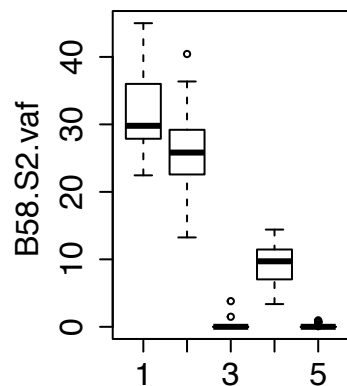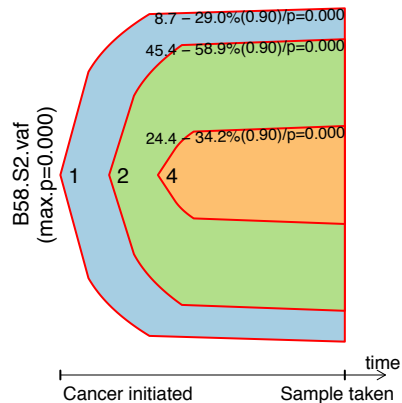

○ group1

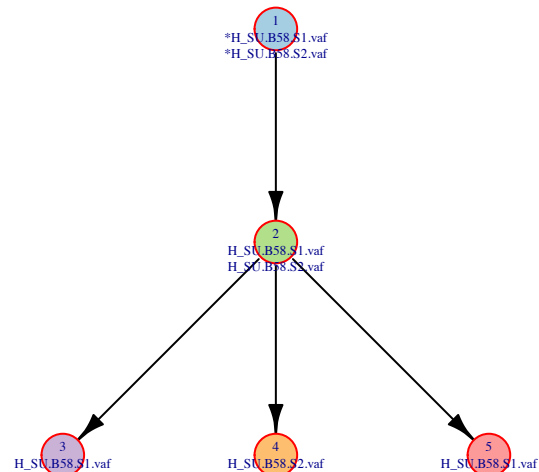

\* sample founding clone  
 ○ zero cellular fraction  
 ○\* ancestor of sample founding clone

B58

Max (clone cross-sample p) = 0

Figure S4

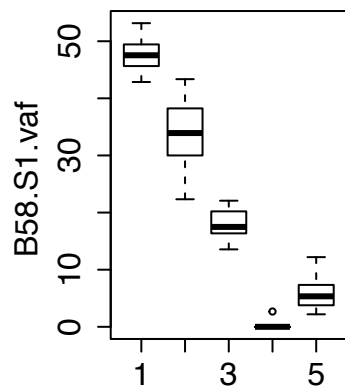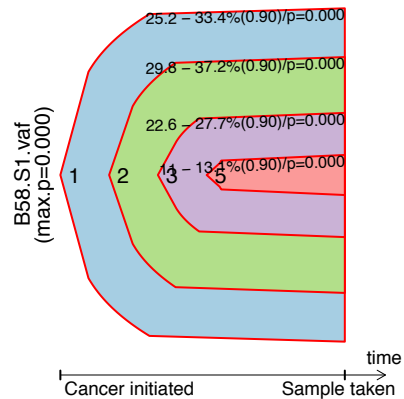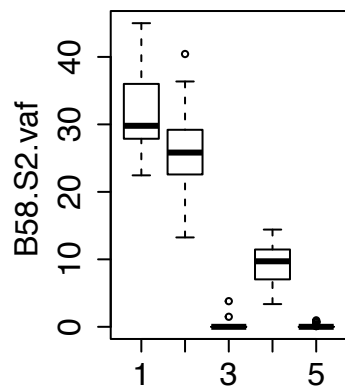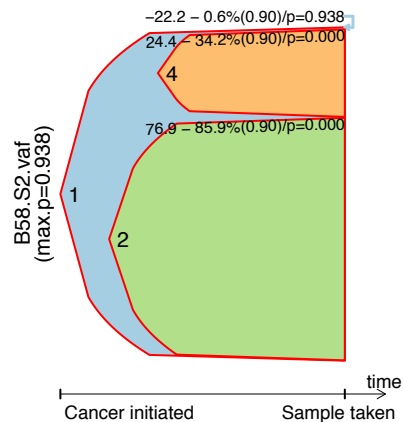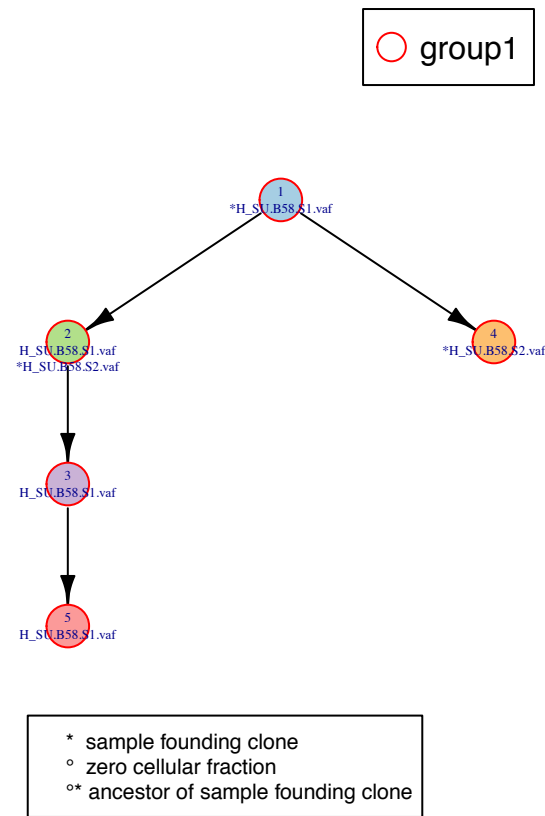

B58

Max (clone cross-sample p) = 0

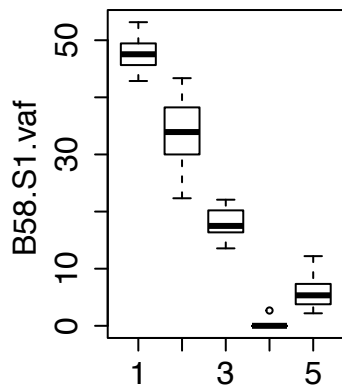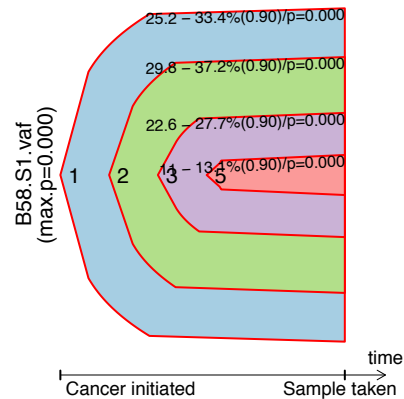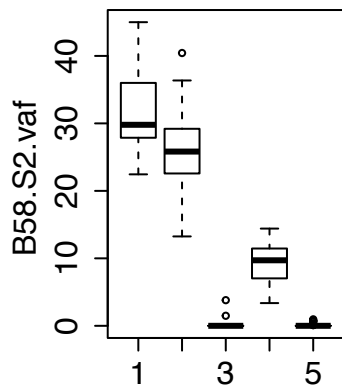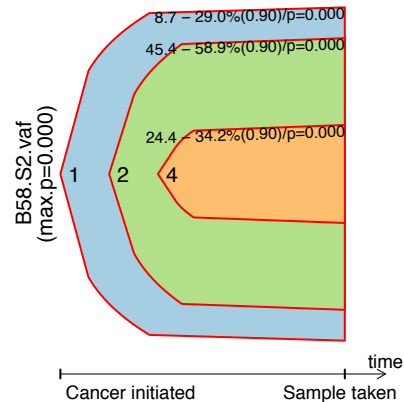

○ group1

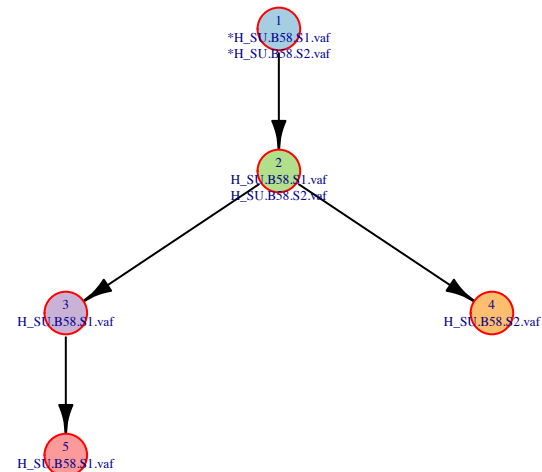

\* sample founding clone  
 ○ zero cellular fraction  
 ○\* ancestor of sample founding clone

B65

Max (clone cross-sample p) = 0

Figure S4

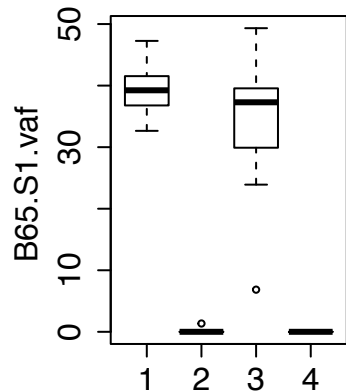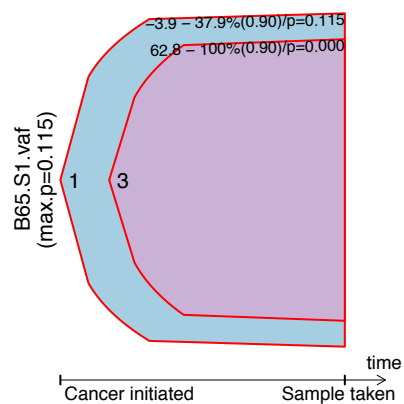

○ group1

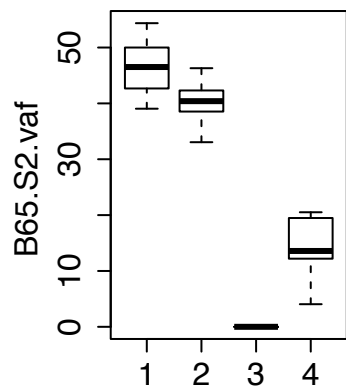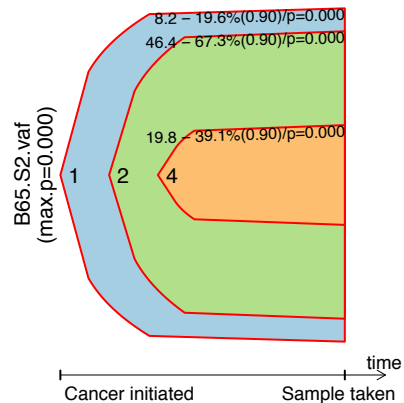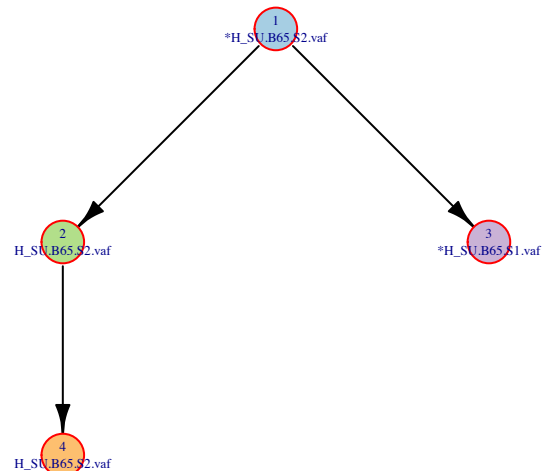

\* sample founding clone  
 ○ zero cellular fraction  
 ○\* ancestor of sample founding clone

B67

Max (clone cross-sample p) = 0

Figure S4

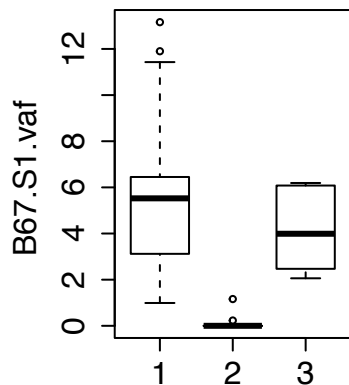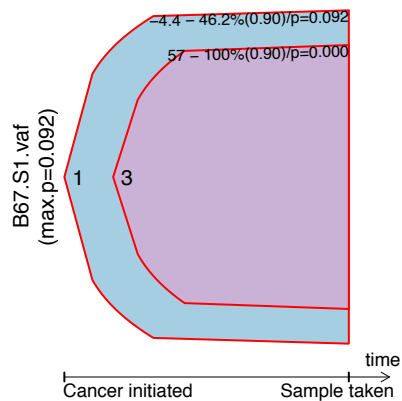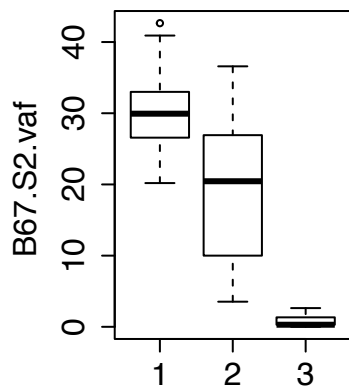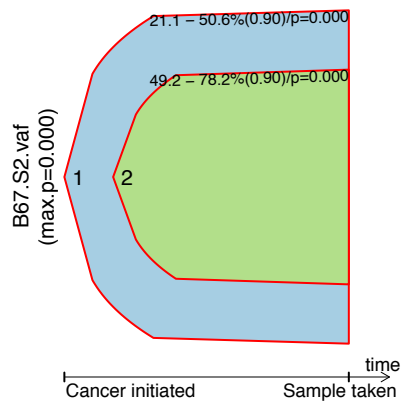

○ group1

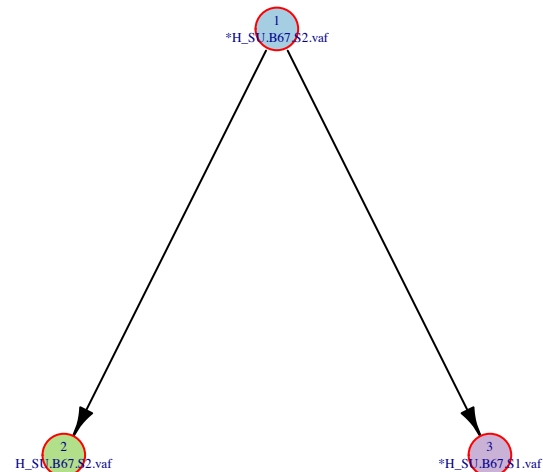

\* sample founding clone  
 ○ zero cellular fraction  
 ○\* ancestor of sample founding clone

B71

Max (clone cross-sample p) = 0

Figure S4

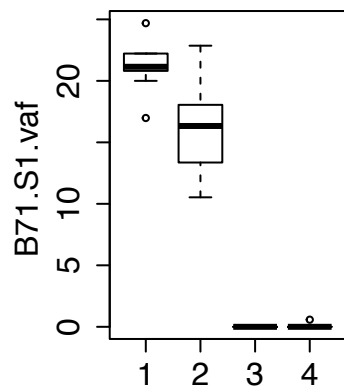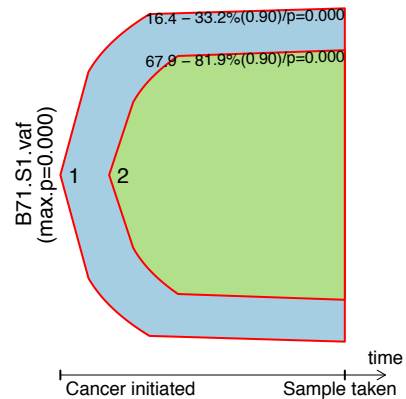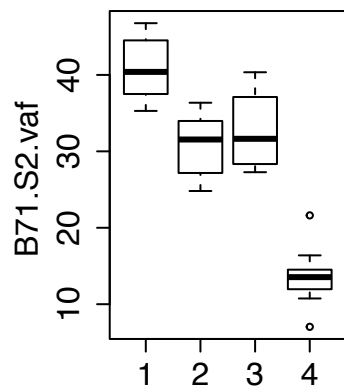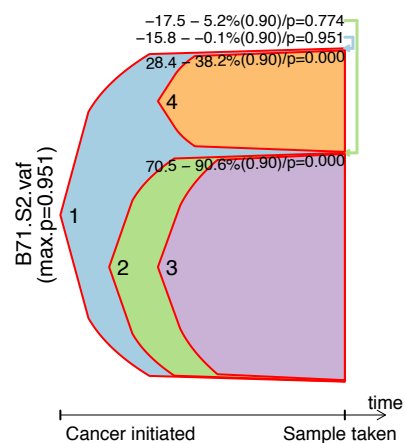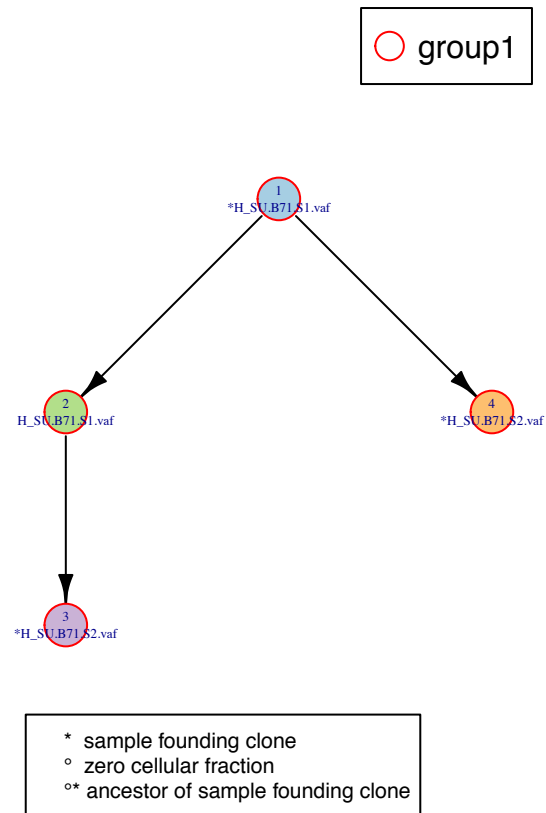



B71

Max (clone cross-sample p) = 0

Figure S4

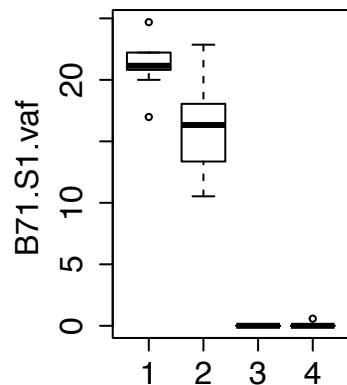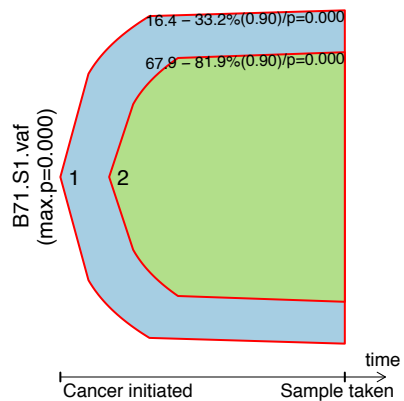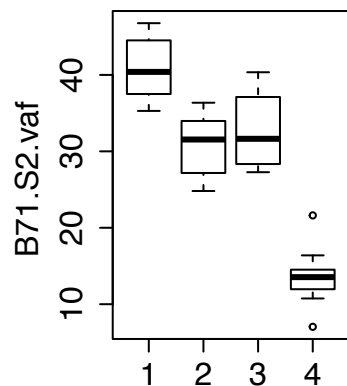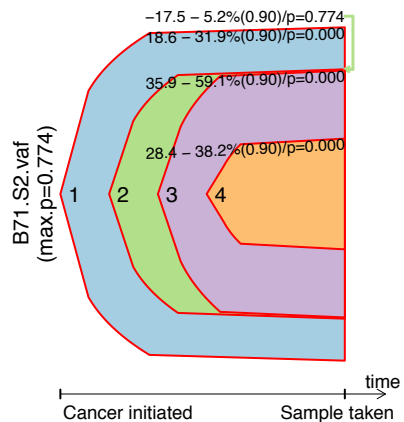

○ group1

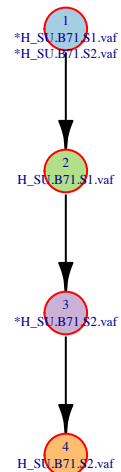

\* sample founding clone  
 ○ zero cellular fraction  
 ○\* ancestor of sample founding clone

Max (clone cross-sample p) = 0

○ group1

B72

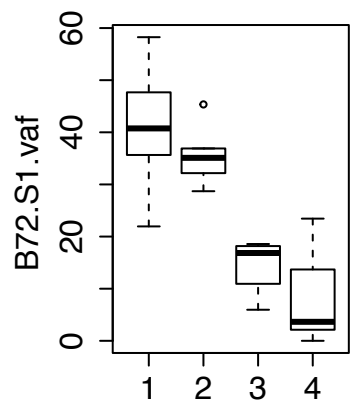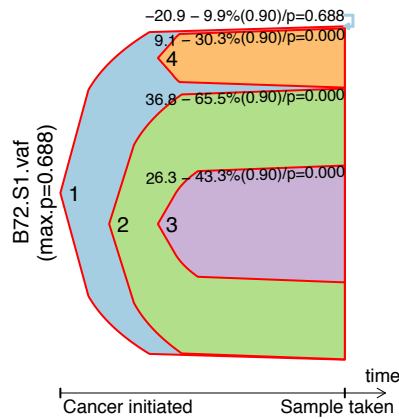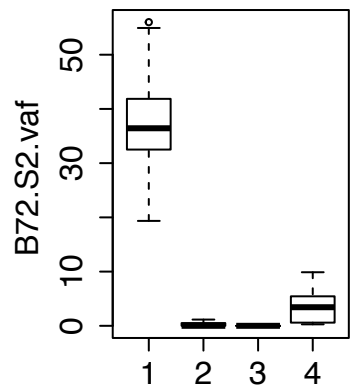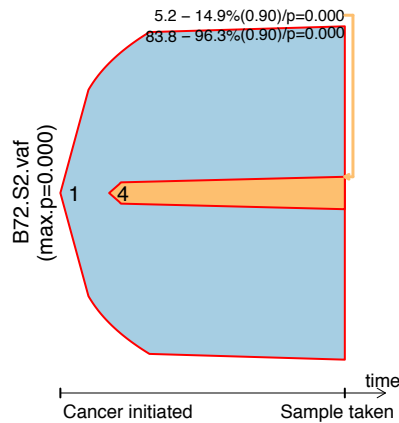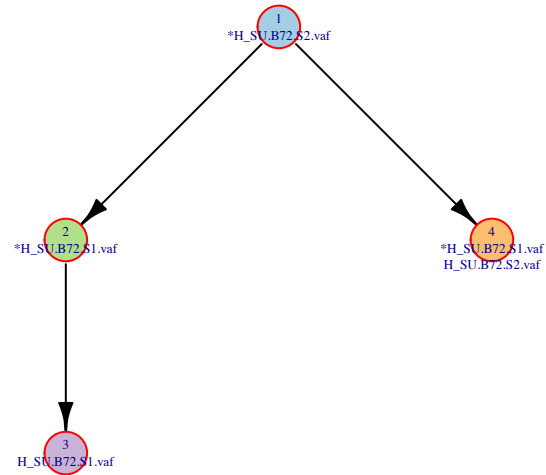

\* sample founding clone  
 ○ zero cellular fraction  
 ○\* ancestor of sample founding clone

B72

Figure S4

○ group1

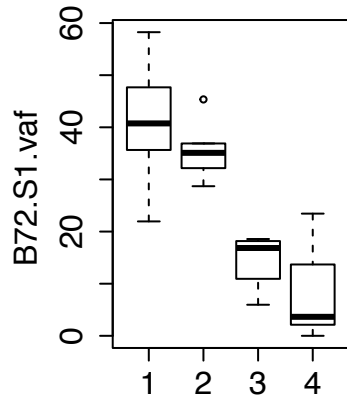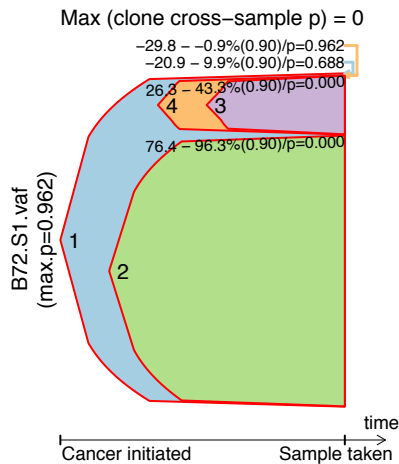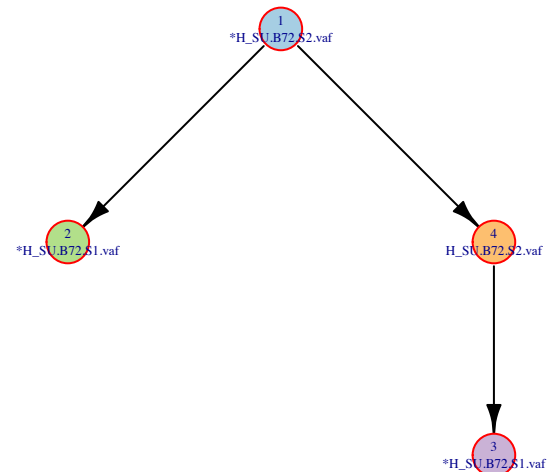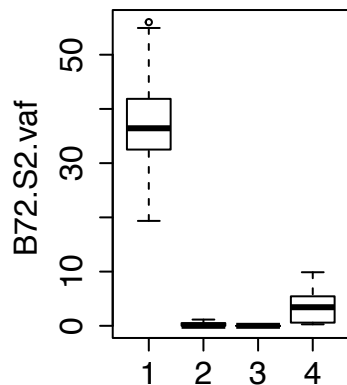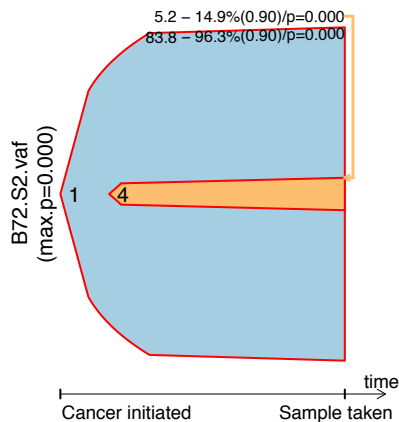

\* sample founding clone  
 ○ zero cellular fraction  
 ○\* ancestor of sample founding clone

○ group1

B74

Max (clone cross-sample p) = 0

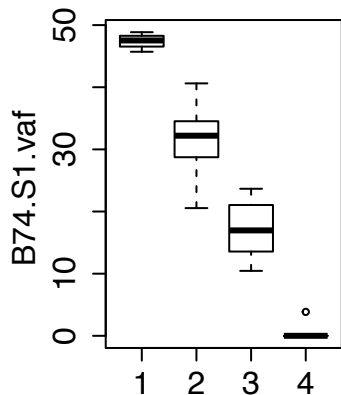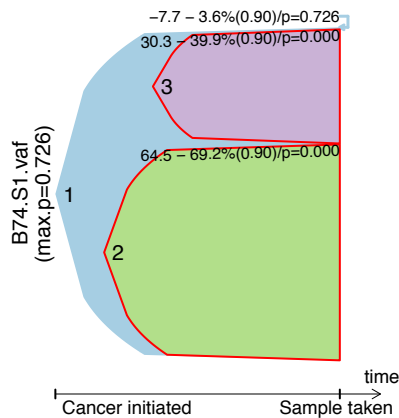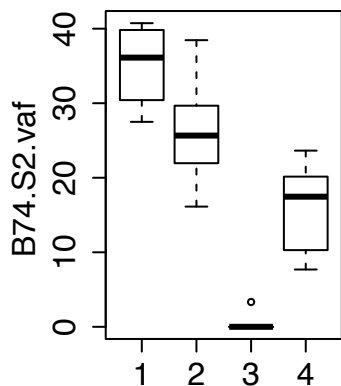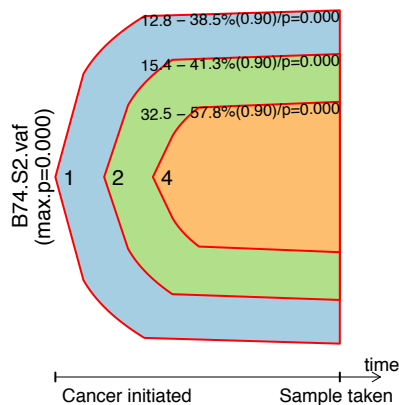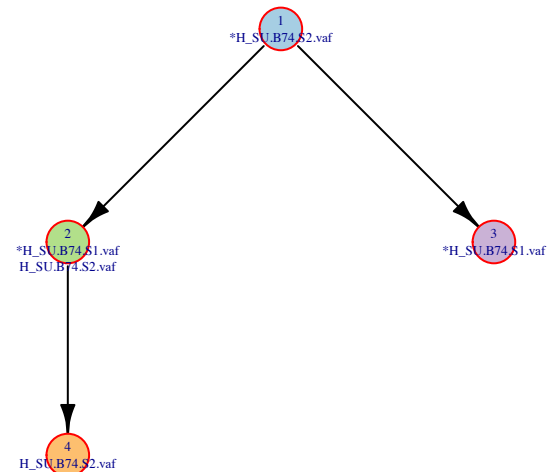

\* sample founding clone  
 ○ zero cellular fraction  
 ○\* ancestor of sample founding clone

B74

Max (clone cross-sample p) = 0

Figure S4

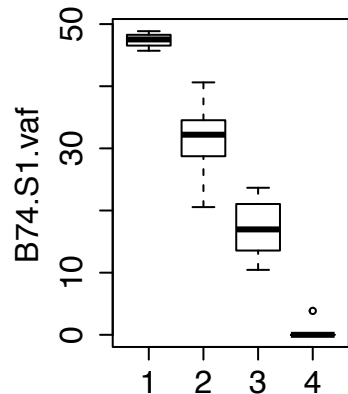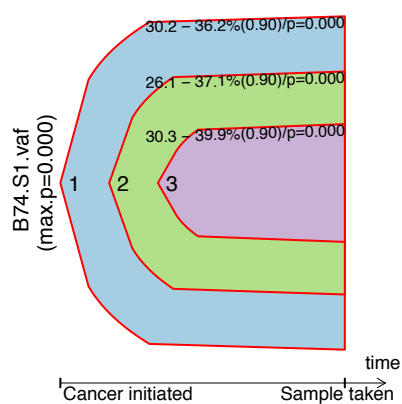

○ group1

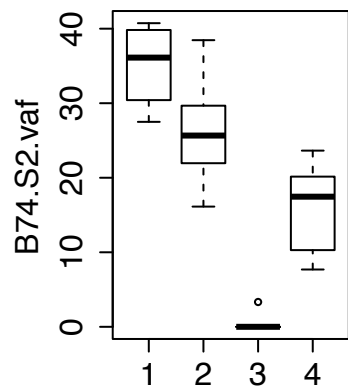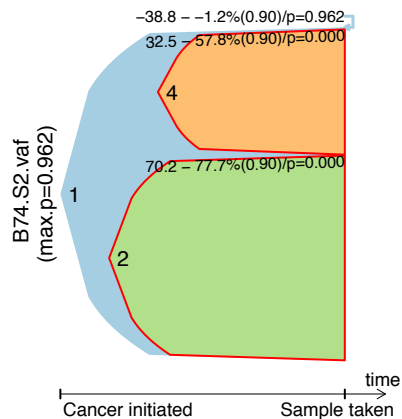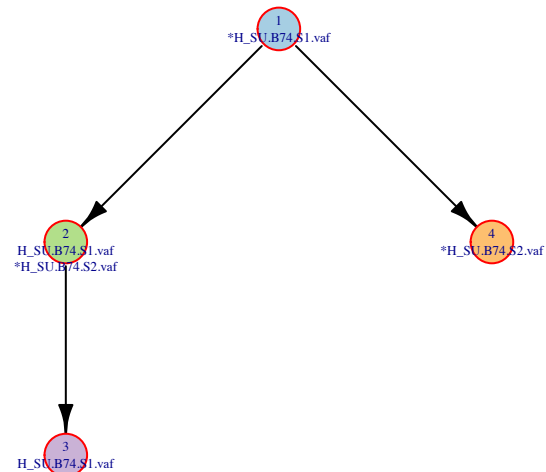

\* sample founding clone  
 ○ zero cellular fraction  
 ○\* ancestor of sample founding clone

B74

Max (clone cross-sample p) = 0

Figure S4

○ group1

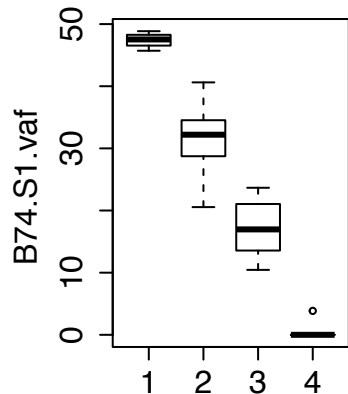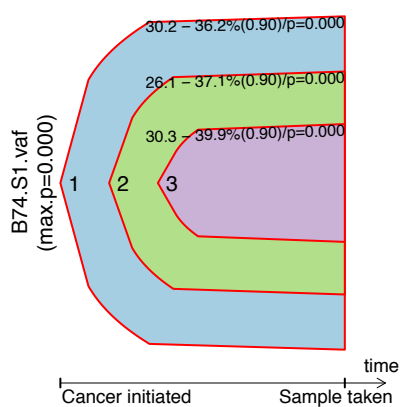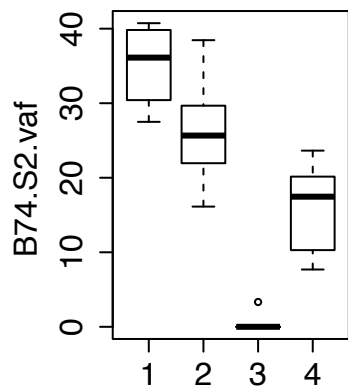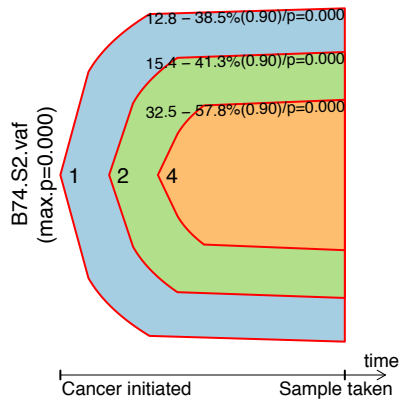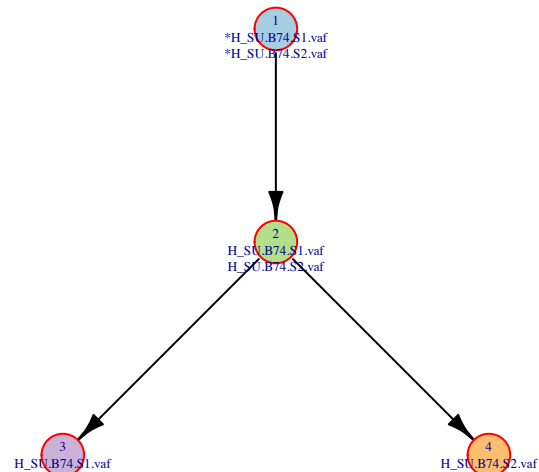

\* sample founding clone  
 ○ zero cellular fraction  
 ○\* ancestor of sample founding clone

B74

Max (clone cross-sample) = 0.69E

Figure S4

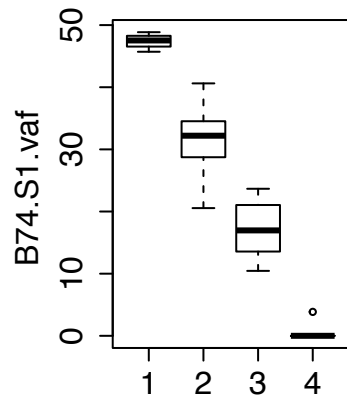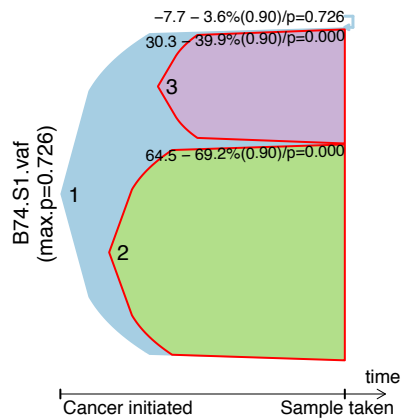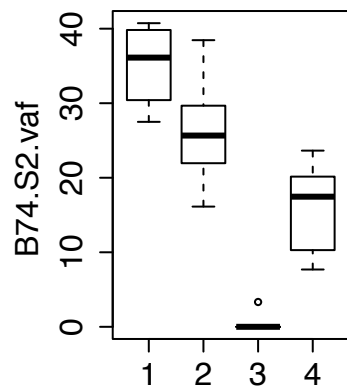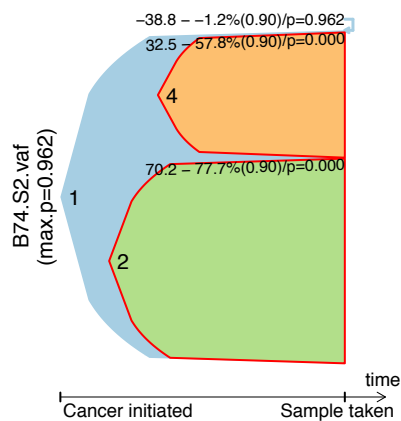

○ group1

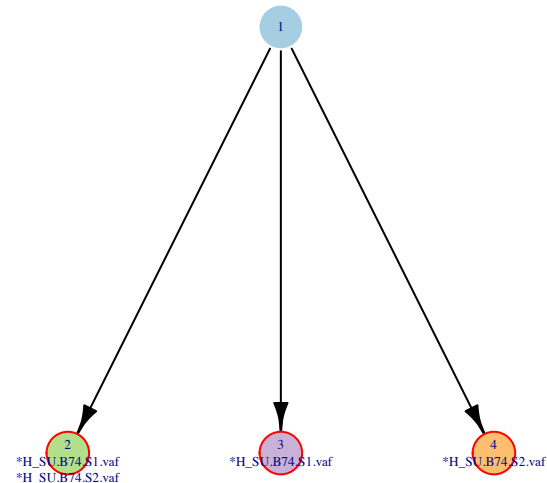

\* sample founding clone  
 ○ zero cellular fraction  
 ○\* ancestor of sample founding clone

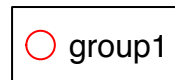

Max (clone cross-sample p) = 0

W016

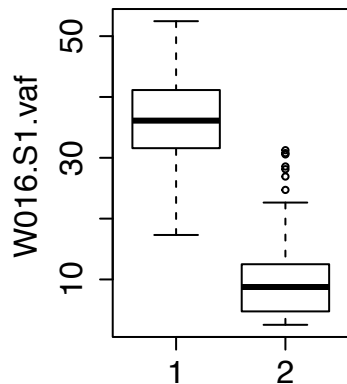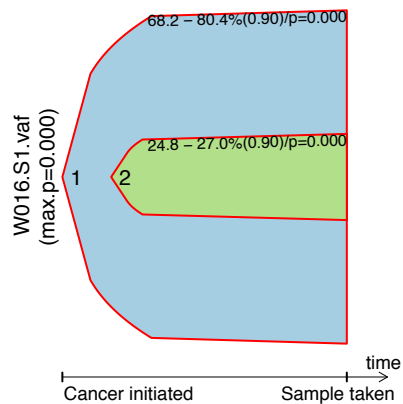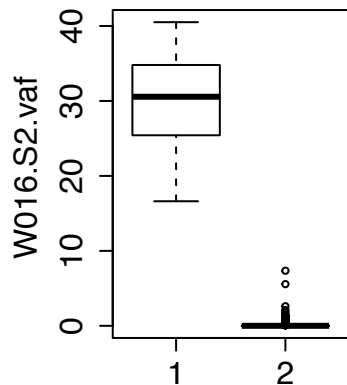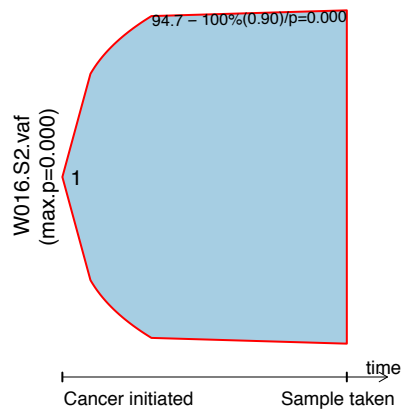

1  
\*H\_SU.W016.S1.vaf  
\*H\_SU.W016.S2.vaf

2  
H\_SU.W016.S1.vaf

- \* sample founding clone
- zero cellular fraction
- \* ancestor of sample founding clone



W059

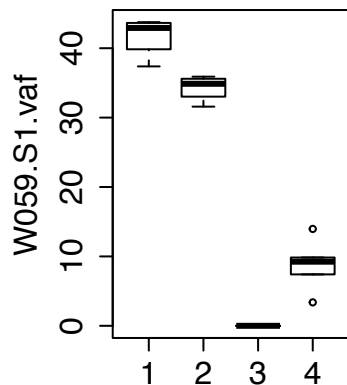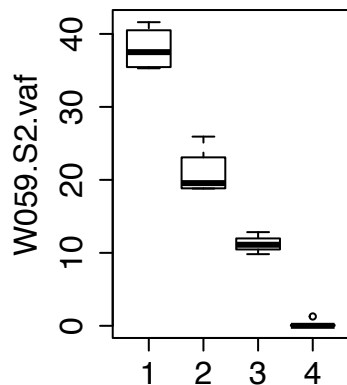

Max (clone cross-sample p) = 0

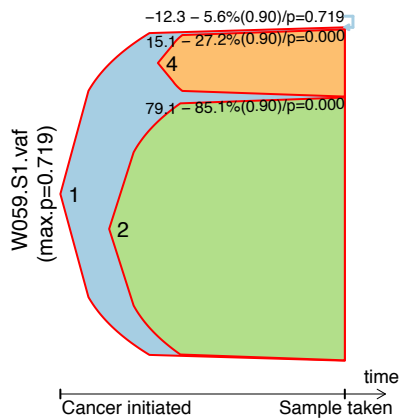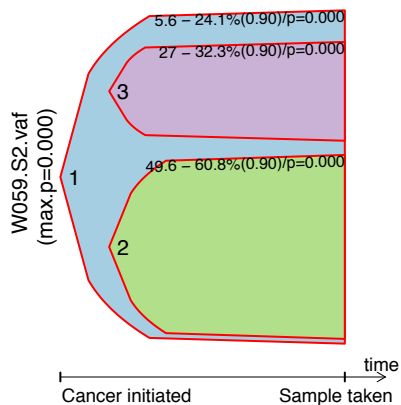

Figure S4

○ group1

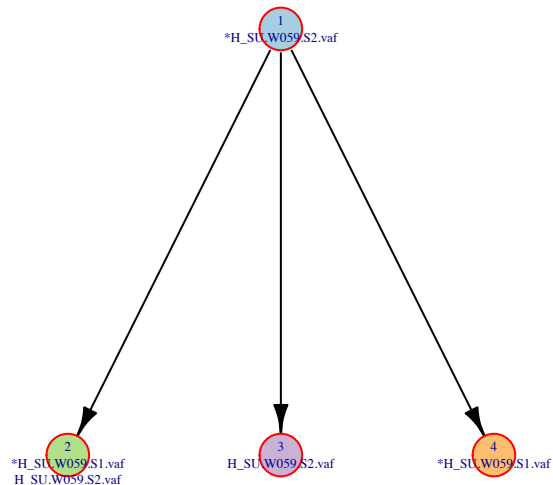

\* sample founding clone  
 ○ zero cellular fraction  
 ○\* ancestor of sample founding clone

W059

Max (clone cross-sample p) = 0

Figure S4

○ group1

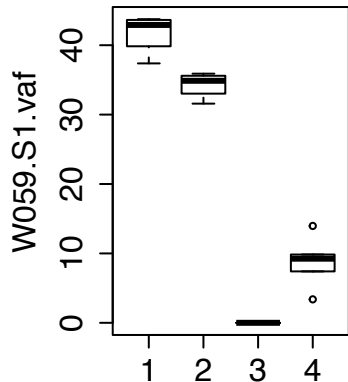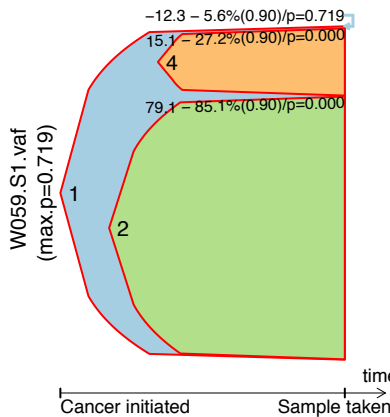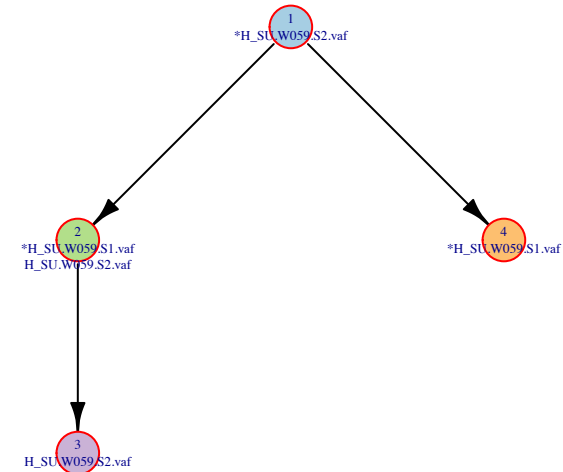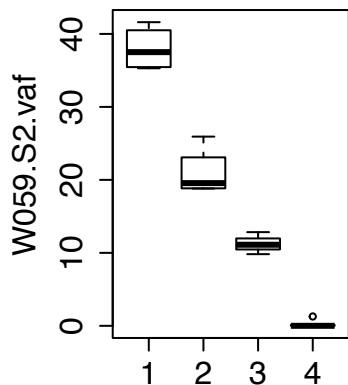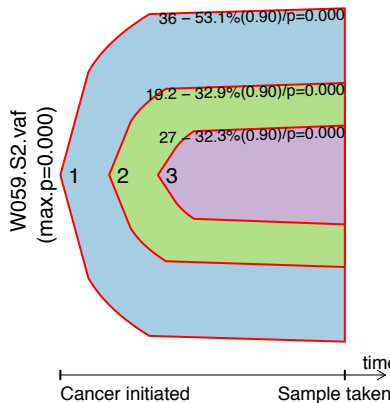

\* sample founding clone  
 ○ zero cellular fraction  
 ○\* ancestor of sample founding clone

W059

Max (clone-sample p) = 0

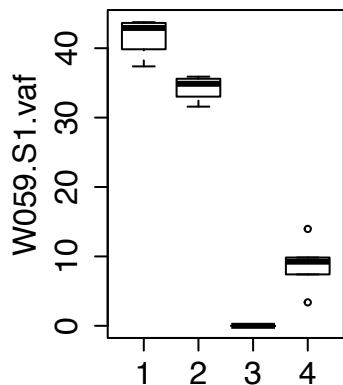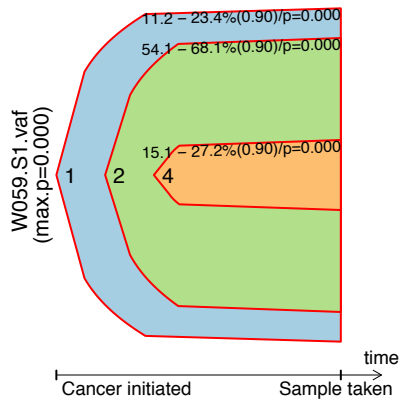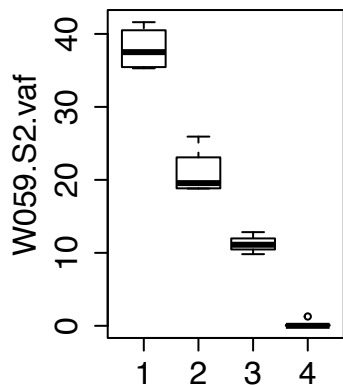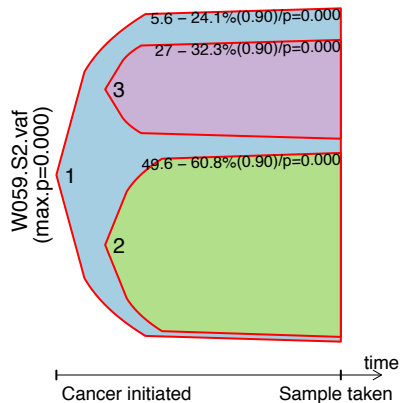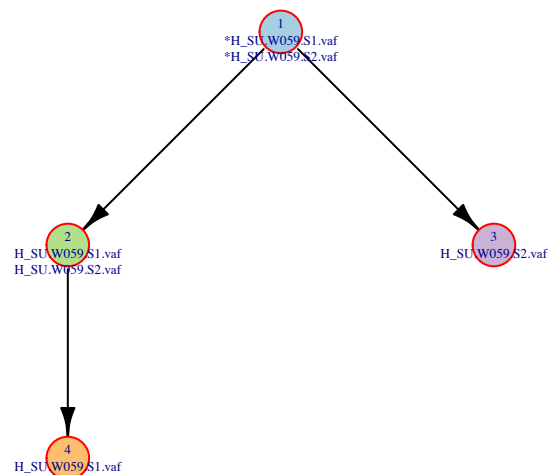

- \* sample founding clone
- o zero cellular fraction
- o\* ancestor of sample founding clone

W059

Max (clone cross-sample p) = 0

Figure S4

○ group1

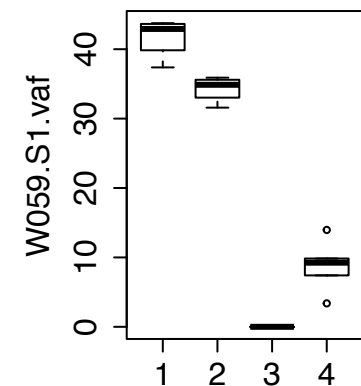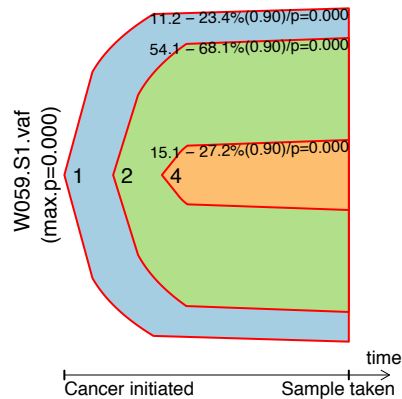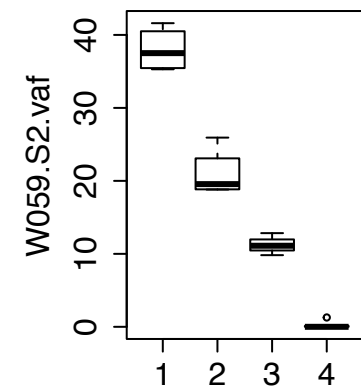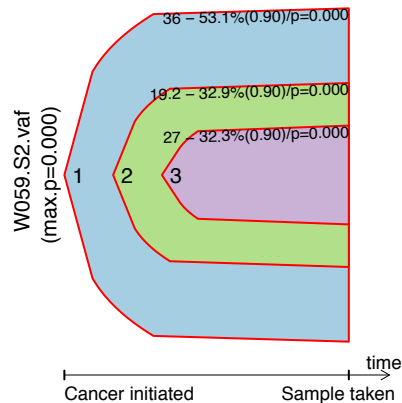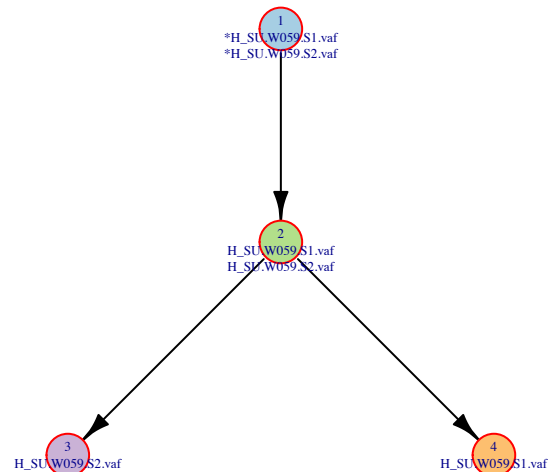

\* sample founding clone  
 ○ zero cellular fraction  
 ○\* ancestor of sample founding clone

Figure S5

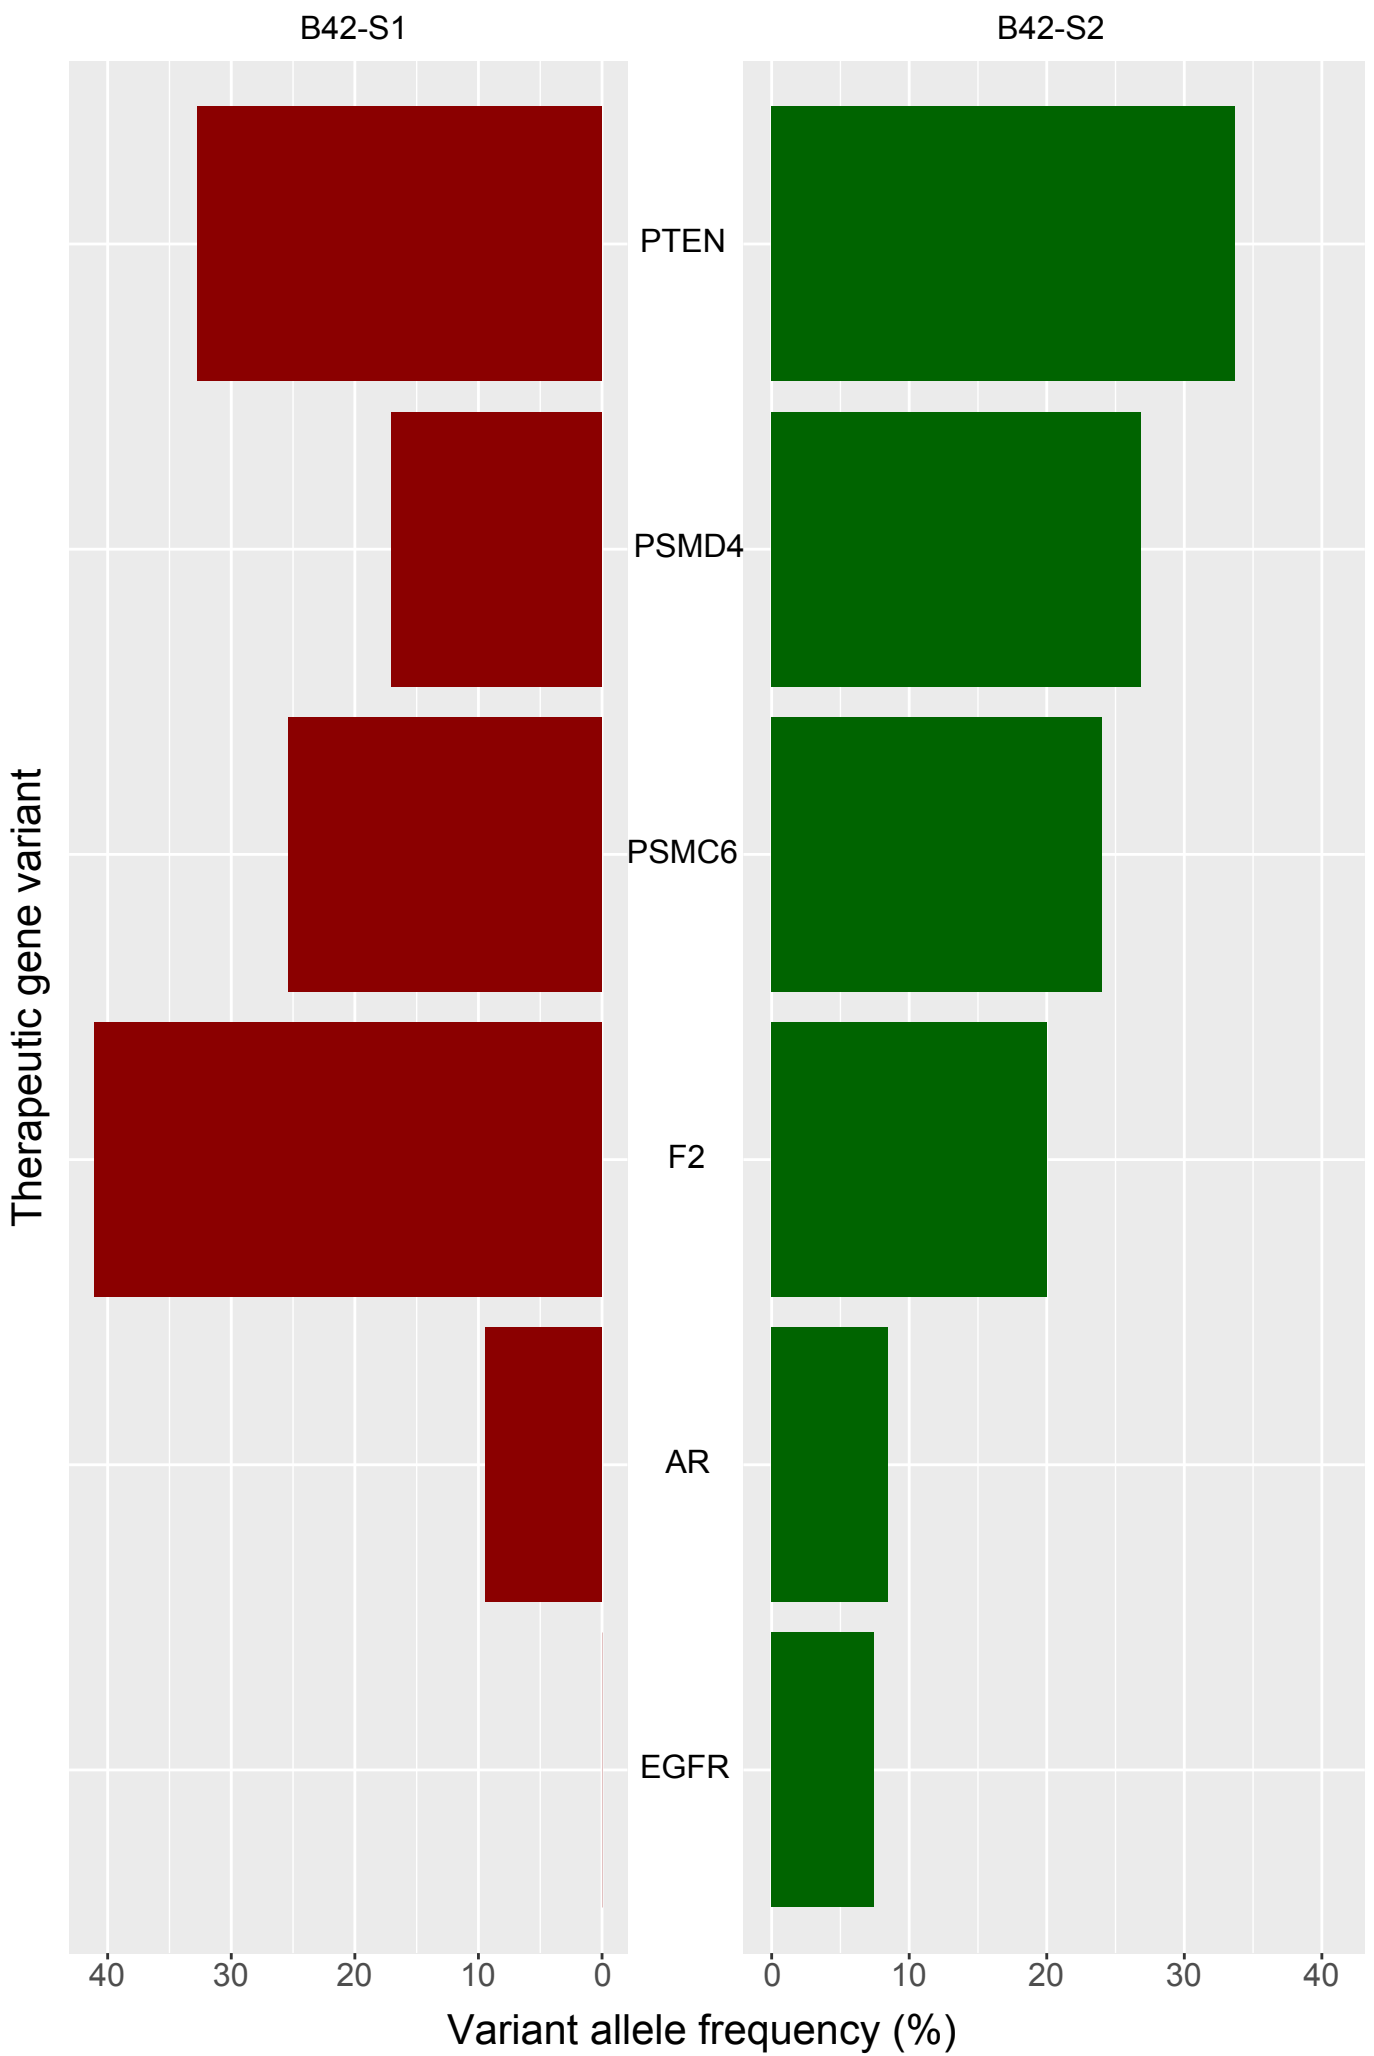

Supplement: nox232_suppl_supplementary_figures.pdf [file nox232_suppl_supplementary_figures.pdf]
