# Supplementary material for: Biological and therapeutic implications of multisector sequencing in newly diagnosed glioblastoma
Source: Oxford University Press journal article supplement (doi:10.1093/neuonc/nox232), 2017-12-13
Supplement: nox232_suppl_supplementary_table_s1.xlsx [file nox232_suppl_supplementary_table_s1.xlsx]

## Sheet: Sheet1
TABLE S1: Whole exome and targeted TERT-promoter sequencing mean target coverage
Sample	Whole-exome seq coverage	TERT promoter seq coverage
B42-S1	113.612	5463.79
B42-S2	112.382	3766.44
B58-S1	118.944	1169.73
B58-S2	97.326	3684.68
B65-S1	115.337	3797.61
B65-S2	134.455	4540.56
B67-S1	114.876	5139.29
B67-S2	118.632	4405.47
B71-S1	112.658	4950
B71-S2	104.445	5405.2
B72-S1	134.405	3670.21
B72-S2	109.986	3946.28
B74-S1	131.532	3303.4
B74-S2	134.536	3727.7
W016-S1	76.8235	2653.82
W016-S2	118.12	4113.48
W059-S1	96.6181	3216.81
W059-S2	114.718	5909.89
B103-S1	91.4906	10551.7
B103-S2	54.4016	6879.11
B103-S3	76.7099	6808.39
B103-S4	64.0762	5610.89
