# Supplementary material for: Biological and therapeutic implications of multisector sequencing in newly diagnosed glioblastoma
Source: Oxford University Press journal article supplement (doi:10.1093/neuonc/nox232), 2017-12-13
Supplement: nox232_suppl_supplementary_table_s2.xls [file nox232_suppl_supplementary_table_s2.xls]

## Sheet: Sheet1
Table S2: Comprehensive list of all copy number events for all samples in the study cohort
chr	start	stop	segment_mean	sample
1	112998582	113666794	1.57871	B103-S1
1	113934068	116570067	1.89421	B103-S1
1	116574228	117283485	2.13637	B103-S1
1	117297071	156918114	1.69716	B103-S1
1	13090	259259	2.66139	B103-S1
1	156918214	181206662	1.96576	B103-S1
1	15976353	16057865	1.14839	B103-S1
1	16058358	17685345	1.64769	B103-S1
1	17685445	17749195	1.23261	B103-S1
1	17749295	23918973	1.70325	B103-S1
1	181206762	181767523	2.5583	B103-S1
1	182354990	201852147	2.07077	B103-S1
1	201860468	205056910	1.74071	B103-S1
1	205057010	205131186	1.34976	B103-S1
1	205131229	207966899	1.93981	B103-S1
1	208041114	232162333	1.88909	B103-S1
1	232172487	232651040	2.55089	B103-S1
1	232940823	249231502	1.86451	B103-S1
1	23953642	24077825	1.11212	B103-S1
1	24077893	32887508	1.56819	B103-S1
1	266859	15976253	1.63343	B103-S1
1	33059032	33233720	1.20861	B103-S1
1	33330426	64515248	1.75022	B103-S1
1	64515348	65004021	3.1946	B103-S1
1	65016215	112997327	2.02276	B103-S1
10	106907575	107012689	1.4444	B103-S1
10	107012786	120070605	0.874934	B103-S1
10	120631604	135455035	0.848886	B103-S1
10	24508602	24821048	1.18144	B103-S1
10	24833940	30977011	0.74227	B103-S1
10	31137852	31810262	1.13768	B103-S1
10	31813070	34985368	0.832508	B103-S1
10	35003279	35495973	0.5117	B103-S1
10	35500156	49226558	0.793484	B103-S1
10	49236438	49319145	0.496335	B103-S1
10	49392571	50857800	1.03341	B103-S1
10	50902929	51974770	0.612424	B103-S1
10	52002961	69366910	0.972086	B103-S1
10	61648	23731361	0.811616	B103-S1
10	69407275	89622257	0.722531	B103-S1
10	89623257	93044137	1.03175	B103-S1
10	93184903	106907475	0.756726	B103-S1
11	101765544	102820753	1.94523	B103-S1
11	102820853	107463169	2.26442	B103-S1
11	107463269	108277729	1.52806	B103-S1
11	108277829	112119876	1.88349	B103-S1
11	112119976	113582856	2.2396	B103-S1
11	113582956	113957616	1.65428	B103-S1
11	114027071	116627823	2.25159	B103-S1
11	116627923	117009013	1.88284	B103-S1
11	117009113	117233385	1.51069	B103-S1
11	117234111	118239549	1.89286	B103-S1
11	118240222	119503553	1.60278	B103-S1
11	119508893	120352189	2.11231	B103-S1
11	120352286	120707650	1.57768	B103-S1
11	120732652	122484441	2.17221	B103-S1
11	122489589	123351611	1.63215	B103-S1
11	123362645	123624929	2.0371	B103-S1
11	123625029	124120693	2.42126	B103-S1
11	124120793	126319131	1.94131	B103-S1
11	126326394	128679128	2.48686	B103-S1
11	128680383	129312896	2.02758	B103-S1
11	129317505	130284735	1.73544	B103-S1
11	130286079	132813066	2.40958	B103-S1
11	132813166	134188655	1.99346	B103-S1
11	134188755	134606023	2.32001	B103-S1
11	15099001	16497986	2.61663	B103-S1
11	16505352	16836896	1.93895	B103-S1
11	16837702	17429970	1.59123	B103-S1
11	17430070	18134367	2.03852	B103-S1
11	18134625	18733666	1.5688	B103-S1
11	18733766	32126098	2.23158	B103-S1
11	2187310	2970542	2.1376	B103-S1
11	2972433	3143235	1.70397	B103-S1
11	3143335	3439675	2.03284	B103-S1
11	32126142	33376168	1.6339	B103-S1
11	33553696	34074257	2.03426	B103-S1
11	34093197	34226429	1.66365	B103-S1
11	34228193	34644144	1.98063	B103-S1
11	3439730	4229595	1.59657	B103-S1
11	34653167	35339016	2.49704	B103-S1
11	35456201	46401706	1.93836	B103-S1
11	372893	723384	1.55486	B103-S1
11	4229712	7079811	2.1235	B103-S1
11	46402007	48238874	1.50789	B103-S1
11	48328079	48601539	1.84637	B103-S1
11	48601607	48967096	1.34263	B103-S1
11	48967196	49141366	1.88611	B103-S1
11	49141976	50227689	2.23439	B103-S1
11	50227749	55111384	1.64256	B103-S1
11	55111484	56739412	2.23419	B103-S1
11	56756370	57193627	1.86426	B103-S1
11	57228451	57798429	1.50073	B103-S1
11	57798529	60899556	2.03284	B103-S1
11	60899656	65373488	1.65723	B103-S1
11	65381150	65684394	1.88734	B103-S1
11	65688865	78380936	1.69228	B103-S1
11	7081154	7489320	2.67669	B103-S1
11	724768	821730	1.88227	B103-S1
11	7489853	8122554	2.13215	B103-S1
11	78387136	78567001	2.11939	B103-S1
11	78567101	82516567	2.58686	B103-S1
11	8122990	9199859	1.8369	B103-S1
11	821830	2187210	1.58302	B103-S1
11	82516667	83165955	1.9952	B103-S1
11	83166055	84732689	2.36708	B103-S1
11	84732789	85347386	1.79229	B103-S1
11	85361236	85456842	2.2756	B103-S1
11	85459279	86267568	1.92194	B103-S1
11	86267668	86656876	2.51011	B103-S1
11	86656976	87032794	1.96496	B103-S1
11	86924	372784	1.85093	B103-S1
11	87032894	88911856	2.49952	B103-S1
11	88924346	94328602	1.97884	B103-S1
11	9199959	9829514	1.49213	B103-S1
11	94328694	101762406	2.28765	B103-S1
11	9829614	15098901	2.08115	B103-S1
12	109182223	114227508	1.54792	B103-S1
12	114261007	114841822	2.18221	B103-S1
12	114987641	115121190	1.4478	B103-S1
12	115121290	117487083	1.94288	B103-S1
12	117494615	123072526	1.50811	B103-S1
12	12232461	13228844	1.66365	B103-S1
12	123073106	123107188	1.04097	B103-S1
12	123109241	123789310	1.60123	B103-S1
12	123789410	123830018	1.1603	B103-S1
12	123830118	124358157	1.53898	B103-S1
12	124358257	125398017	1.87612	B103-S1
12	125398117	125621425	1.53142	B103-S1
12	125626578	130934876	2.0266	B103-S1
12	130935738	131475628	1.6339	B103-S1
12	131475670	132199529	2.09116	B103-S1
12	132199602	133795460	1.64923	B103-S1
12	13228944	14538381	2.33786	B103-S1
12	14576850	14836269	1.77413	B103-S1
12	14839098	19408209	2.2126	B103-S1
12	19408245	19987648	1.6071	B103-S1
12	20094323	31256932	2.10483	B103-S1
12	247885	2908230	1.8897	B103-S1
12	2908330	3149342	1.53041	B103-S1
12	31257972	33138938	1.51136	B103-S1
12	3149442	4830149	1.9916	B103-S1
12	33139038	34320037	2.27143	B103-S1
12	34376447	38595516	1.45689	B103-S1
12	38595781	40962982	2.12749	B103-S1
12	40963399	41946497	2.60934	B103-S1
12	41946597	42555668	1.9918	B103-S1
12	42599599	42863332	1.60762	B103-S1
12	42863432	45810721	2.31734	B103-S1
12	45810797	48866864	2.036	B103-S1
12	4835657	6032048	2.23983	B103-S1
12	48866964	51639331	1.57308	B103-S1
12	51639706	51749776	1.15179	B103-S1
12	51857485	53215783	1.96497	B103-S1
12	53215832	54062861	1.54133	B103-S1
12	54062961	54912937	1.71796	B103-S1
12	54913037	56090143	2.02616	B103-S1
12	56109941	57404934	1.55368	B103-S1
12	57406190	58722354	1.74982	B103-S1
12	59266249	59308076	2.57555	B103-S1
12	59308176	64588255	1.95764	B103-S1
12	6054250	7477140	1.69585	B103-S1
12	64588355	65224419	1.49638	B103-S1
12	65225879	68947645	2.02394	B103-S1
12	67845	247538	2.70499	B103-S1
12	69020588	69260952	1.51103	B103-S1
12	69263199	70938357	1.88875	B103-S1
12	70938457	71519261	2.43946	B103-S1
12	71523036	72318166	1.9998	B103-S1
12	72332718	76083000	2.38043	B103-S1
12	7477240	7559431	2.43045	B103-S1
12	7584997	7709854	1.90542	B103-S1
12	76083072	78590867	1.95883	B103-S1
12	7759593	8073804	1.26045	B103-S1
12	78590967	79952718	2.32959	B103-S1
12	79952801	80696487	1.92175	B103-S1
12	80696587	89743404	2.3258	B103-S1
12	8088647	9090408	1.67251	B103-S1
12	89744375	89917993	1.81151	B103-S1
12	89918093	91342986	2.29298	B103-S1
12	9090508	9524388	2.03304	B103-S1
12	91346013	91502271	2.85247	B103-S1
12	91502371	94818745	1.9898	B103-S1
12	94914983	95926920	1.51219	B103-S1
12	9550151	9728439	1.7063	B103-S1
12	96052714	109182123	1.89093	B103-S1
12	9747837	12232361	2.14253	B103-S1
13	101294498	103397404	2.21647	B103-S1
13	103397504	103436758	1.82653	B103-S1
13	103436858	113202237	2.17735	B103-S1
13	113202337	114203956	1.78269	B103-S1
13	114204056	114780749	2.19031	B103-S1
13	114781646	115010354	1.55317	B103-S1
13	115010454	115092819	2.02172	B103-S1
13	19041945	28578302	1.80459	B103-S1
13	28578402	28644458	1.2108	B103-S1
13	28644558	33350309	1.85734	B103-S1
13	33350392	41040765	2.22488	B103-S1
13	41040810	41948114	1.64161	B103-S1
13	41948871	45169406	2.03588	B103-S1
13	45169506	46115841	1.59295	B103-S1
13	46118893	50007746	2.02374	B103-S1
13	50008199	50623064	1.57922	B103-S1
13	50623164	52534332	2.22509	B103-S1
13	52534432	53313200	1.72443	B103-S1
13	53313756	61985333	2.20886	B103-S1
13	61985433	73277975	2.48892	B103-S1
13	73282557	74261290	1.85036	B103-S1
13	74261390	95363252	2.18561	B103-S1
13	95411239	96651677	1.87766	B103-S1
13	96665606	98116654	2.45726	B103-S1
13	98116754	101290310	1.91714	B103-S1
14	102285341	106391444	1.65266	B103-S1
14	106405480	107283323	2.32848	B103-S1
14	19110159	19377660	1.37521	B103-S1
14	19377760	20181462	1.76841	B103-S1
14	20181562	20296533	2.5871	B103-S1
14	20502835	22217551	1.72341	B103-S1
14	22217651	22997625	2.3016	B103-S1
14	22997694	23236037	1.92077	B103-S1
14	23236096	24900116	1.75136	B103-S1
14	24900161	31097587	2.25874	B103-S1
14	31099655	31549859	1.75774	B103-S1
14	31552540	31787501	1.40095	B103-S1
14	31787581	32626635	1.80459	B103-S1
14	32626735	34420076	2.33361	B103-S1
14	34817944	35182613	1.56659	B103-S1
14	35182870	35255220	1.16813	B103-S1
14	35255412	36350622	1.66559	B103-S1
14	36350722	39304872	2.21109	B103-S1
14	39501185	39901094	1.61192	B103-S1
14	39901392	45333229	2.3229	B103-S1
14	45333329	47120305	1.79229	B103-S1
14	47120405	47770740	2.53899	B103-S1
14	50065728	50791009	1.53579	B103-S1
14	50792218	51381655	1.82822	B103-S1
14	51382043	52978113	2.17604	B103-S1
14	52978213	56101482	1.77228	B103-S1
14	56103186	56119866	2.46632	B103-S1
14	56120220	57948312	1.89	B103-S1
14	58048003	58605185	2.21518	B103-S1
14	58605285	59465013	1.7063	B103-S1
14	59468136	63842003	2.13138	B103-S1
14	63842103	65182665	1.58917	B103-S1
14	65182764	67691973	2.01647	B103-S1
14	67736428	68244760	1.66311	B103-S1
14	68244860	69550722	2.02293	B103-S1
14	69818990	69993931	1.46194	B103-S1
14	69994031	71061646	1.98183	B103-S1
14	71061728	71216870	1.54337	B103-S1
14	71227718	73407015	2.00642	B103-S1
14	73407115	74845094	1.43438	B103-S1
14	74845135	77797465	1.76086	B103-S1
14	77797565	78183985	1.42185	B103-S1
14	78184438	78764200	1.71496	B103-S1
14	78764247	88701704	2.20503	B103-S1
14	88701748	91633650	1.7869	B103-S1
14	91633750	94046512	1.65696	B103-S1
14	94046612	102276377	1.96485	B103-S1
15	20083724	20776320	1.50421	B103-S1
15	20813683	21009445	2.07817	B103-S1
15	21009745	22151777	1.69159	B103-S1
15	22151877	22466604	2.24894	B103-S1
15	22657999	23608040	1.53531	B103-S1
15	23685012	28408273	2.02479	B103-S1
15	28408373	28607942	1.68962	B103-S1
15	28608001	28899295	1.26941	B103-S1
15	28899395	30696994	1.63828	B103-S1
15	30699668	30854039	1.226	B103-S1
15	30854384	32606205	1.85511	B103-S1
15	32606305	32916827	1.53865	B103-S1
15	32917211	33066542	1.94936	B103-S1
15	33191047	33939808	2.24219	B103-S1
15	33941252	37189004	1.85663	B103-S1
15	37196608	38229093	2.86312	B103-S1
15	38229193	40661278	2.0012	B103-S1
15	40661365	47534504	1.58953	B103-S1
15	47534604	49288874	2.29894	B103-S1
15	49292056	49531344	1.89073	B103-S1
15	49531444	50475033	2.3354	B103-S1
15	50521176	50751475	1.96713	B103-S1
15	50754421	51285488	1.36816	B103-S1
15	51285588	52098720	1.96773	B103-S1
15	52100513	53081560	1.75973	B103-S1
15	53081780	54920820	2.45031	B103-S1
15	55473644	57836064	1.7734	B103-S1
15	57836665	58834720	2.28175	B103-S1
15	58834820	78780695	1.74562	B103-S1
15	78780766	78882444	1.33444	B103-S1
15	78882544	79305057	1.65993	B103-S1
15	79307720	82564077	2.03365	B103-S1
15	82564177	83932352	1.68266	B103-S1
15	83932452	84795534	2.01365	B103-S1
15	84842712	86311449	1.6932	B103-S1
15	86311549	88690673	2.33384	B103-S1
15	88726579	91491961	1.65093	B103-S1
15	91492092	92432424	2.0118	B103-S1
15	92432507	93016182	2.35086	B103-S1
15	93016282	93974468	1.82559	B103-S1
15	94304180	98517011	2.37658	B103-S1
15	98517069	99500588	1.90078	B103-S1
15	99500688	99670604	1.59536	B103-S1
15	99670892	102514857	1.92116	B103-S1
16	14029144	14397937	2.06175	B103-S1
16	14697990	16524754	1.47403	B103-S1
16	160612	5649167	1.61491	B103-S1
16	17190003	18141973	1.86445	B103-S1
16	18407113	20043180	1.45215	B103-S1
16	20043280	20944651	1.93778	B103-S1
16	20944751	22448890	1.51316	B103-S1
16	22465888	22623146	1.17786	B103-S1
16	22623246	29438743	1.55641	B103-S1
16	29438843	29680380	1.08812	B103-S1
16	29680480	30129043	1.63233	B103-S1
16	30129143	30312402	1.11782	B103-S1
16	30312502	32266275	1.60686	B103-S1
16	32266375	32485534	1.26702	B103-S1
16	32486410	33327037	1.77246	B103-S1
16	33327137	33424752	1.30823	B103-S1
16	33424844	34441460	1.78282	B103-S1
16	34467321	34766121	2.35176	B103-S1
16	46388469	46507969	0.990118	B103-S1
16	46508266	47117457	1.54601	B103-S1
16	47117557	48201462	2.10773	B103-S1
16	48201562	50702061	1.72745	B103-S1
16	50702911	52480238	2.13626	B103-S1
16	52553300	53860377	1.78894	B103-S1
16	53860477	56718035	2.03693	B103-S1
16	56718140	59200927	1.60347	B103-S1
16	5810706	8622280	2.22682	B103-S1
16	59200973	66570994	2.20272	B103-S1
16	66575820	68598851	1.56693	B103-S1
16	68685005	69105862	1.23482	B103-S1
16	69105921	71054302	1.46961	B103-S1
16	71318204	71512327	1.85055	B103-S1
16	71512699	72094862	1.46863	B103-S1
16	72131659	74121667	2.09451	B103-S1
16	74121737	76311464	1.52022	B103-S1
16	76311564	80838310	2.0829	B103-S1
16	79801	150458	1.9126	B103-S1
16	81009985	81510051	1.49444	B103-S1
16	81529082	83817036	2.00479	B103-S1
16	83817064	85834995	1.65993	B103-S1
16	85838510	87160680	2.11731	B103-S1
16	8622370	14029044	1.64791	B103-S1
16	87160777	90291239	1.66807	B103-S1
17	10247251	15469046	1.85682	B103-S1
17	15469146	16365826	1.41801	B103-S1
17	16455044	28959844	1.63233	B103-S1
17	28959944	29335290	1.30382	B103-S1
17	29343903	31094865	1.60025	B103-S1
17	31355342	33445656	2.06023	B103-S1
17	33445726	34958478	1.59167	B103-S1
17	35307447	35614733	1.91105	B103-S1
17	35614833	37071412	1.52438	B103-S1
17	37071500	37331589	1.28366	B103-S1
17	37333479	37370575	1.73909	B103-S1
17	37371181	37721532	1.26478	B103-S1
17	37776144	38949646	1.61178	B103-S1
17	38950055	39646179	2.01849	B103-S1
17	39648529	43587798	1.52853	B103-S1
17	43587870	43627406	1.09788	B103-S1
17	43627506	49375434	1.63364	B103-S1
17	463696	656716	1.86846	B103-S1
17	49567737	54921642	2.1288	B103-S1
17	54923018	62796261	1.64311	B103-S1
17	62796470	62923685	1.27301	B103-S1
17	62923785	66551988	1.62921	B103-S1
17	656816	7211969	1.57994	B103-S1
17	66864079	67267529	2.15802	B103-S1
17	67267809	67703378	1.73617	B103-S1
17	67703478	70122641	2.12838	B103-S1
17	70122741	81188353	1.63198	B103-S1
17	7212920	7915771	0.685693	B103-S1
17	7915830	7980457	1.43358	B103-S1
17	7980557	8134876	1.89401	B103-S1
17	8134976	8358187	1.53915	B103-S1
17	8358287	8508234	1.8744	B103-S1
17	8508334	10247182	1.55619	B103-S1
18	11619408	15316898	1.77753	B103-S1
18	15322106	19120719	1.33753	B103-S1
18	19120819	21444809	1.71424	B103-S1
18	21444896	21759824	2.01164	B103-S1
18	21761102	22057590	1.5222	B103-S1
18	22642623	23714000	2.33183	B103-S1
18	23714100	24039979	1.62186	B103-S1
18	24056561	29102329	2.25351	B103-S1
18	29104405	30252561	1.72002	B103-S1
18	30252661	43221287	2.26727	B103-S1
18	43221366	43547342	1.69822	B103-S1
18	43565142	43667413	1.28233	B103-S1
18	43667513	43843027	1.63373	B103-S1
18	43843127	44497400	2.00963	B103-S1
18	44500007	44625798	1.44197	B103-S1
18	44626603	55035216	2.01994	B103-S1
18	55103667	55274932	1.71243	B103-S1
18	55276576	55685015	1.40715	B103-S1
18	55685430	57792441	1.89998	B103-S1
18	57792541	59916913	2.25504	B103-S1
18	59917013	60983422	1.82239	B103-S1
18	60985471	61582822	2.16331	B103-S1
18	61582922	67869313	2.37171	B103-S1
18	67871317	70416148	1.79117	B103-S1
18	70416213	74208443	2.24894	B103-S1
18	7232119	8371844	2.35514	B103-S1
18	74402169	77894038	1.89093	B103-S1
18	77894269	77960896	2.26311	B103-S1
18	8376007	11610614	1.94936	B103-S1
18	87114	7232019	1.81391	B103-S1
19	15880426	15990864	3.32753	B103-S1
19	15996717	24345973	2.4902	B103-S1
19	28246372	32844676	2.95902	B103-S1
19	32873902	36640484	2.46596	B103-S1
19	36641026	36940604	1.80515	B103-S1
19	36940704	43064756	2.49749	B103-S1
19	43087433	43716761	2.99844	B103-S1
19	43724165	48283381	2.56763	B103-S1
19	48283940	48626376	1.84637	B103-S1
19	48626538	52961500	2.49176	B103-S1
19	52961559	54072723	1.58177	B103-S1
19	54103649	54313438	2.11731	B103-S1
19	54327180	54485427	2.56667	B103-S1
19	54485527	55631200	1.59043	B103-S1
19	55644230	56896354	2.49225	B103-S1
19	56896573	57345283	3.09062	B103-S1
19	57639949	58145927	2.69031	B103-S1
19	58146027	58220489	1.61196	B103-S1
19	58231825	59023121	2.50112	B103-S1
19	59025638	59110742	3.40095	B103-S1
19	60747	15872263	2.40986	B103-S1
2	105472956	106781250	2.18465	B103-S1
2	106781350	107123631	1.5097	B103-S1
2	107313636	108453220	2.44961	B103-S1
2	108453320	131377735	1.81495	B103-S1
2	131377835	131414088	0.936801	B103-S1
2	131414166	179366587	2.05627	B103-S1
2	14393	33817142	1.81555	B103-S1
2	179368818	179467134	2.49315	B103-S1
2	179467234	179476561	3.24646	B103-S1
2	179476661	198245669	2.25299	B103-S1
2	198245769	207653504	1.80135	B103-S1
2	207824427	208420380	2.64592	B103-S1
2	208420480	209134590	1.58196	B103-S1
2	209136298	218874991	2.17702	B103-S1
2	218924888	222308447	1.76933	B103-S1
2	222310771	222827644	2.61663	B103-S1
2	222827744	242423767	1.85964	B103-S1
2	242429036	242441123	1.28037	B103-S1
2	242443507	243037303	1.67607	B103-S1
2	33817242	36970456	2.28703	B103-S1
2	36981954	39934243	1.74438	B103-S1
2	39934343	40636839	2.3952	B103-S1
2	42165721	49141840	1.80185	B103-S1
2	49189933	52302745	2.46609	B103-S1
2	52302823	66287391	1.82133	B103-S1
2	66287594	67626536	2.5583	B103-S1
2	67626636	87389584	1.87292	B103-S1
2	87389620	87618968	1.29804	B103-S1
2	87620096	105442718	1.86562	B103-S1
20	10621911	13269233	3.80786	B103-S1
20	13539635	14305190	2.71872	B103-S1
20	14305632	17928377	3.36749	B103-S1
20	18122908	18529528	2.71972	B103-S1
20	18535837	25060148	3.26397	B103-S1
20	2290988	3674143	2.58782	B103-S1
20	25060203	35507629	2.53971	B103-S1
20	35507697	35786450	2.17412	B103-S1
20	35787265	40086187	2.84726	B103-S1
20	3674243	3782943	3.03119	B103-S1
20	3783580	4164211	2.5054	B103-S1
20	40101961	41420173	3.41525	B103-S1
20	41514378	43150446	2.49131	B103-S1
20	4164311	4716871	2.97881	B103-S1
20	43150546	44333854	2.99709	B103-S1
20	44334455	44512740	2.47518	B103-S1
20	44512950	45654215	3.03854	B103-S1
20	45700492	48479586	2.61489	B103-S1
20	4768710	6025180	2.63973	B103-S1
20	48479686	48732103	2.18945	B103-S1
20	48732156	50292682	2.64347	B103-S1
20	50292776	50715007	1.98701	B103-S1
20	50715107	51873164	3.17455	B103-S1
20	51873264	52558241	2.3664	B103-S1
20	52561267	54978807	3.11831	B103-S1
20	54987549	55497245	2.25525	B103-S1
20	55497291	56533777	3.77153	B103-S1
20	56533877	60509413	3.22815	B103-S1
20	6025280	7875834	3.11942	B103-S1
20	60509467	62854593	2.73159	B103-S1
20	68358	947781	2.76986	B103-S1
20	7875934	8609204	4.00159	B103-S1
20	8626722	10621811	3.36957	B103-S1
20	947881	2290888	3.22615	B103-S1
21	10777743	15382072	1.66109	B103-S1
21	15382640	17912261	2.31024	B103-S1
21	17912354	19635322	1.73945	B103-S1
21	19638365	23807996	2.27538	B103-S1
21	23809062	27840823	1.94641	B103-S1
21	27840923	30248707	2.49225	B103-S1
21	30248807	30434958	1.74456	B103-S1
21	30435674	32434374	2.0847	B103-S1
21	32434472	35256065	1.70009	B103-S1
21	35257329	37093079	2.01245	B103-S1
21	37093175	37581203	1.67785	B103-S1
21	37583851	37759991	1.38371	B103-S1
21	37760091	38610890	1.69786	B103-S1
21	38610980	40194661	2.22509	B103-S1
21	40194761	47987850	1.79744	B103-S1
22	16084904	17071750	1.5179	B103-S1
22	17071850	17600172	1.88399	B103-S1
22	17600272	18669280	1.6193	B103-S1
22	18669380	18766925	1.16016	B103-S1
22	18767025	23029824	1.62642	B103-S1
22	23040460	23498325	2.11763	B103-S1
22	23500149	26317399	1.62064	B103-S1
22	26342179	26702039	2.32112	B103-S1
22	26706822	29025600	1.77335	B103-S1
22	29025700	29182951	1.29229	B103-S1
22	29183051	43930780	1.59738	B103-S1
22	43936136	44966376	1.92007	B103-S1
22	44966476	45996350	1.56539	B103-S1
22	46067923	46641091	2.08228	B103-S1
22	46641191	47188611	1.63548	B103-S1
22	47188711	49042604	2.13068	B103-S1
22	49089117	51133545	1.71962	B103-S1
22	51137106	51237655	2.15654	B103-S1
3	101369327	101578363	1.61317	B103-S1
3	101713362	108836929	2.25594	B103-S1
3	108837029	109634785	1.40954	B103-S1
3	109634948	141632679	1.96461	B103-S1
3	141670655	142548769	1.63076	B103-S1
3	142557601	152174179	2.17232	B103-S1
3	152554707	152885110	1.6594	B103-S1
3	152886110	169492133	2.16855	B103-S1
3	169492233	170198307	1.70738	B103-S1
3	170201093	172607550	2.01788	B103-S1
3	172631341	173997475	2.77113	B103-S1
3	173998313	186761153	1.75151	B103-S1
3	18580572	19930120	2.37137	B103-S1
3	186769032	190434207	2.28747	B103-S1
3	190552395	195346040	1.95587	B103-S1
3	195346641	197880241	1.57563	B103-S1
3	19930220	20027295	1.43438	B103-S1
3	20027434	30885717	2.12873	B103-S1
3	239424	9471637	2.17221	B103-S1
3	31498066	33896922	1.66559	B103-S1
3	33905588	36422381	2.63442	B103-S1
3	36484921	44700272	1.90925	B103-S1
3	44749888	52817407	1.61928	B103-S1
3	52818294	52840400	2.02798	B103-S1
3	52842599	53321627	1.6993	B103-S1
3	53529034	55726753	2.10337	B103-S1
3	55768841	58097621	1.69324	B103-S1
3	58104535	101312827	2.10638	B103-S1
3	9471737	18457781	1.80659	B103-S1
4	100009879	113486441	2.11134	B103-S1
4	113486541	113748444	1.51419	B103-S1
4	113748488	119203237	2.32892	B103-S1
4	119203337	119399981	2.002	B103-S1
4	119400081	119606824	1.63776	B103-S1
4	119609098	124323025	2.12963	B103-S1
4	125383969	126428645	2.45865	B103-S1
4	128554209	128734383	2.06954	B103-S1
4	128736890	129077156	1.54488	B103-S1
4	129077256	133885684	2.02333	B103-S1
4	133885784	139544650	2.48639	B103-S1
4	139544750	140624741	1.59588	B103-S1
4	140624787	147861152	2.1631	B103-S1
4	147861186	149073871	1.84258	B103-S1
4	149075773	151023703	2.54899	B103-S1
4	151023803	151771960	2.0008	B103-S1
4	151772060	152487334	1.56659	B103-S1
4	152487434	153456484	2.17901	B103-S1
4	153456584	154506162	1.79006	B103-S1
4	154506607	159560588	2.29563	B103-S1
4	159566076	160262844	1.84713	B103-S1
4	160262944	165722346	2.23678	B103-S1
4	165722446	166024340	1.44262	B103-S1
4	166131234	166220731	0.824526	B103-S1
4	166220831	183549873	2.04848	B103-S1
4	183549973	186425861	1.65358	B103-S1
4	186427639	186536297	2.10607	B103-S1
4	186536397	187539343	1.76105	B103-S1
4	187539419	191040528	1.92138	B103-S1
4	23054	9241057	1.76738	B103-S1
4	25404625	25664529	1.30701	B103-S1
4	25665763	26744346	1.77764	B103-S1
4	26749947	37440759	2.34189	B103-S1
4	37440859	39515788	1.69836	B103-S1
4	39515888	40123025	1.29244	B103-S1
4	40123125	41270310	1.64337	B103-S1
4	41495152	48835589	2.1311	B103-S1
4	48835669	49553450	1.56676	B103-S1
4	52780055	54969905	1.97249	B103-S1
4	55087363	55161197	1.60537	B103-S1
4	55161297	55963804	1.95764	B103-S1
4	55963904	55991378	2.48335	B103-S1
4	55991478	57906941	1.74491	B103-S1
4	57907041	66509324	2.37542	B103-S1
4	66509354	68370843	1.75023	B103-S1
4	68441081	71388615	2.21307	B103-S1
4	71389526	71892624	1.62988	B103-S1
4	71895001	75974185	2.20635	B103-S1
4	75974959	77036601	1.65969	B103-S1
4	77036701	82932424	2.09033	B103-S1
4	82932489	84526988	1.69688	B103-S1
4	85165376	85765612	2.05032	B103-S1
4	85765712	87653984	2.47891	B103-S1
4	87655434	89442979	1.90988	B103-S1
4	89443079	99579283	2.25572	B103-S1
4	9370539	9483629	1.14839	B103-S1
4	9485454	9785520	1.65287	B103-S1
4	9785620	25404525	2.11316	B103-S1
4	99579383	100009779	1.76712	B103-S1
5	125882050	126172268	1.43922	B103-S1
5	126187186	133909605	1.97407	B103-S1
5	133914760	134367285	1.48451	B103-S1
5	134670388	137089381	2.21948	B103-S1
5	137089481	140167861	1.66666	B103-S1
5	140175888	156375596	1.98719	B103-S1
5	156378564	156531876	1.57324	B103-S1
5	156535868	169413000	2.01547	B103-S1
5	169435734	169720489	2.34682	B103-S1
5	169724529	180754137	1.67497	B103-S1
5	37085433	37697888	1.51069	B103-S1
5	37697965	68364776	2.01603	B103-S1
5	42767	37085298	2.00111	B103-S1
5	68364876	70671554	1.35838	B103-S1
5	70671654	79473880	1.92877	B103-S1
5	79473980	79655846	1.17585	B103-S1
5	79655917	125881950	2.16334	B103-S1
6	100368924	104582465	2.22241	B103-S1
6	10419848	11194099	1.59674	B103-S1
6	105176807	107040237	1.76509	B103-S1
6	107361419	107595347	1.16884	B103-S1
6	107595447	111211651	1.70487	B103-S1
6	111211694	111494158	1.22263	B103-S1
6	111498401	111793458	1.63793	B103-S1
6	11200400	13295662	2.08723	B103-S1
6	112388136	149700573	1.967	B103-S1
6	13365040	22147108	1.79303	B103-S1
6	145688	5771551	1.92995	B103-S1
6	149700933	151686961	1.55833	B103-S1
6	151766539	155606268	1.81371	B103-S1
6	155606337	157517497	2.15443	B103-S1
6	157517549	160525639	1.67676	B103-S1
6	160525739	160952958	2.07858	B103-S1
6	160953058	162372616	1.62032	B103-S1
6	162372699	165990030	0.921918	B103-S1
6	166074177	171049067	1.88804	B103-S1
6	22147263	24146183	2.50399	B103-S1
6	24146357	24598616	1.59743	B103-S1
6	24600867	25670443	1.91221	B103-S1
6	25682109	25862259	2.42356	B103-S1
6	25862477	28097197	1.96436	B103-S1
6	28121544	28542696	2.13702	B103-S1
6	28872213	29070024	1.83672	B103-S1
6	29079714	29599430	2.15739	B103-S1
6	29599512	31236908	1.75829	B103-S1
6	31237008	31371372	2.21216	B103-S1
6	31371472	32336722	1.69912	B103-S1
6	32337626	33028804	2.16572	B103-S1
6	33036345	38562038	1.70194	B103-S1
6	38562078	41470387	2.09012	B103-S1
6	41470533	44394016	1.62622	B103-S1
6	44394258	55441878	2.11783	B103-S1
6	55441957	56380517	2.53685	B103-S1
6	56380578	65510756	2.08117	B103-S1
6	5771651	7177110	2.45364	B103-S1
6	65523338	66011878	2.70026	B103-S1
6	66011978	69795240	2.23253	B103-S1
6	69943144	70099419	2.70274	B103-S1
6	70386024	71212558	2.04991	B103-S1
6	71232204	71547475	1.62622	B103-S1
6	71547575	73110420	2.15106	B103-S1
6	7182091	7518488	1.57409	B103-S1
6	73332465	73905078	1.65693	B103-S1
6	74001863	74348083	1.19657	B103-S1
6	74348183	75795211	1.7431	B103-S1
6	7518543	10419800	1.9956	B103-S1
6	75795311	75975189	2.22315	B103-S1
6	75975250	79671625	1.86577	B103-S1
6	79672735	82462456	2.20143	B103-S1
6	82462556	84895311	1.81488	B103-S1
6	84896041	85997053	2.22574	B103-S1
6	85997153	86321637	1.54624	B103-S1
6	86322594	88058638	1.86885	B103-S1
6	88060053	88410692	1.49328	B103-S1
6	88410792	89563555	2.11585	B103-S1
6	89563634	90572193	1.62849	B103-S1
6	90572838	90586793	1.18273	B103-S1
6	90596642	91226346	1.59519	B103-S1
6	91226446	93969027	2.08146	B103-S1
6	93969127	96054215	2.554	B103-S1
6	96495021	96985553	1.91085	B103-S1
6	96986595	97247060	2.45378	B103-S1
6	97247160	99622884	2.00056	B103-S1
6	99622984	100368824	1.71045	B103-S1
7	102389130	124482947	3.20765	B103-S1
7	124483047	126698279	4.07091	B103-S1
7	126716262	131625844	2.7615	B103-S1
7	131625900	132720799	3.53691	B103-S1
7	132990826	138363291	3.18329	B103-S1
7	138363687	138447051	2.07755	B103-S1
7	138447097	141170428	2.54303	B103-S1
7	141170528	141765357	3.3141	B103-S1
7	141765457	141791683	4.44545	B103-S1
7	141791783	156743106	2.98346	B103-S1
7	156743206	156798510	2.3725	B103-S1
7	156801673	159026181	2.77189	B103-S1
7	2279267	2405992	2.09488	B103-S1
7	23180438	23871977	2.61833	B103-S1
7	23943873	24932059	3.53629	B103-S1
7	2406092	4823424	2.81081	B103-S1
7	25175998	33304126	3.13223	B103-S1
7	31104	2279108	2.69677	B103-S1
7	33313536	34977773	3.54797	B103-S1
7	34978932	37924061	3.07795	B103-S1
7	37988419	39446412	3.49507	B103-S1
7	39472737	40900136	2.64886	B103-S1
7	42000380	54827072	3.00181	B103-S1
7	4825922	5939919	2.34413	B103-S1
7	55001138	55177789	17.6947	B103-S1
7	55221643	55279403	17.1939	B103-S1
7	55326716	56356570	2.46563	B103-S1
7	56356672	56635750	1.57409	B103-S1
7	56636210	56878935	2.55066	B103-S1
7	56878971	57063789	1.7473	B103-S1
7	57068950	57669998	2.79455	B103-S1
7	57887819	63370769	2.05582	B103-S1
7	5940019	5984657	1.53175	B103-S1
7	6018284	7119906	2.30055	B103-S1
7	63370808	63539573	2.73853	B103-S1
7	63573435	76684800	2.30516	B103-S1
7	7273968	23165535	3.39857	B103-S1
7	76744878	77648296	2.81375	B103-S1
7	77648396	87076622	3.61492	B103-S1
7	87080937	97784110	3.26317	B103-S1
7	97788591	97868059	2.53258	B103-S1
7	97874041	98506445	2.19972	B103-S1
7	98506481	98543344	2.84573	B103-S1
7	98545777	102344067	2.44368	B103-S1
8	101642683	101908398	1.47076	B103-S1
8	101931069	103358656	2.01184	B103-S1
8	103359152	104075209	1.62849	B103-S1
8	104075309	109248560	2.10254	B103-S1
8	109252106	110352801	2.51554	B103-S1
8	110352901	110457857	2.01708	B103-S1
8	110457957	117658876	2.47984	B103-S1
8	117658935	120639034	2.11252	B103-S1
8	120650724	124664380	1.76693	B103-S1
8	124664456	125131987	2.15317	B103-S1
8	125132087	131128871	1.80739	B103-S1
8	131128971	134274453	2.22574	B103-S1
8	134276840	146279524	1.79003	B103-S1
8	22009288	22424012	1.4946	B103-S1
8	22424123	22900695	2.01372	B103-S1
8	22900795	23160992	1.58384	B103-S1
8	23167114	24774995	2.15993	B103-S1
8	24775095	35382030	1.81519	B103-S1
8	3253845	6266841	2.42057	B103-S1
8	327861	3253745	1.95962	B103-S1
8	35382093	36793461	2.15486	B103-S1
8	36952842	37734864	1.61282	B103-S1
8	37734893	37986394	1.19325	B103-S1
8	37986472	39080780	1.71459	B103-S1
8	39089496	39695753	2.25678	B103-S1
8	39717814	41845175	1.83672	B103-S1
8	41905855	43147664	1.49295	B103-S1
8	43147743	48767869	1.86843	B103-S1
8	48767969	49297329	1.54792	B103-S1
8	49297429	54669298	2.19736	B103-S1
8	54682163	55612006	1.63669	B103-S1
8	55612106	56273303	2.33562	B103-S1
8	56651400	57092178	1.72431	B103-S1
8	57123611	62491375	2.14201	B103-S1
8	62491475	63492322	2.56643	B103-S1
8	6266941	7308525	1.80589	B103-S1
8	63502274	66534581	2.04522	B103-S1
8	66539448	66636745	1.39382	B103-S1
8	66636994	67425896	2.07529	B103-S1
8	67428117	68695369	1.74092	B103-S1
8	68989863	70570939	2.19009	B103-S1
8	70571039	72111247	1.80683	B103-S1
8	72111347	73481438	2.5257	B103-S1
8	7308625	8042666	1.33244	B103-S1
8	73531532	74525980	1.98402	B103-S1
8	74704485	74893458	1.3935	B103-S1
8	75156804	81083688	2.328	B103-S1
8	8049776	22009188	1.93601	B103-S1
8	81177843	81727644	1.77912	B103-S1
8	81727744	90997017	2.06362	B103-S1
8	91013690	94241866	2.42516	B103-S1
8	94241966	95518766	1.91824	B103-S1
8	95518866	96053672	1.50704	B103-S1
8	96053772	96599328	1.81094	B103-S1
8	96691042	97797352	2.22877	B103-S1
8	98289628	99076731	1.57815	B103-S1
8	99076831	101642589	1.92897	B103-S1
9	101778280	104032263	2.03434	B103-S1
9	104032363	106903082	2.35896	B103-S1
9	107037803	109625475	1.89266	B103-S1
9	109625575	109879237	2.71497	B103-S1
9	109879337	113206111	1.88246	B103-S1
9	113208241	114128671	2.23244	B103-S1
9	114128771	117568192	1.73146	B103-S1
9	117568240	123301426	2.22229	B103-S1
9	118800	1057668	1.75444	B103-S1
9	123301526	125873661	1.81488	B103-S1
9	125873857	125946508	2.29496	B103-S1
9	126028325	128001162	1.68057	B103-S1
9	12769	118700	2.43806	B103-S1
9	128001262	128100015	1.14854	B103-S1
9	128268582	129458777	1.97844	B103-S1
9	1290425	4299645	2.28395	B103-S1
9	129516752	129648143	1.37786	B103-S1
9	129714517	130210240	1.95626	B103-S1
9	130210576	140218253	1.68147	B103-S1
9	140218465	140328620	1.27676	B103-S1
9	140328720	141016169	1.65693	B103-S1
9	141016269	141109984	2.26705	B103-S1
9	14994603	15564088	1.77893	B103-S1
9	15564188	18952584	2.14453	B103-S1
9	19026952	19597206	1.57939	B103-S1
9	19597306	21026717	2.24894	B103-S1
9	21026817	21865946	0.975189	B103-S1
9	22748042	26841260	1.22512	B103-S1
9	26841360	26962154	1.93268	B103-S1
9	26978106	27455393	0.83765	B103-S1
9	27455493	27949461	1.27526	B103-S1
9	28889021	32333568	2.52357	B103-S1
9	32333864	32787116	2.00883	B103-S1
9	32787216	33536820	1.62447	B103-S1
9	33536920	33799254	1.96812	B103-S1
9	33817769	34379249	1.41625	B103-S1
9	34379620	72114529	1.73525	B103-S1
9	4299694	6253704	2.02195	B103-S1
9	6254451	6834763	1.54539	B103-S1
9	6834863	14981486	2.36437	B103-S1
9	72435745	72758791	2.19244	B103-S1
9	72772524	73225645	1.79322	B103-S1
9	73225745	74299761	2.35064	B103-S1
9	74299983	75420301	1.79675	B103-S1
9	75420401	77425861	2.1837	B103-S1
9	77425903	77681825	1.56931	B103-S1
9	77683926	79014244	2.08723	B103-S1
9	79014344	79938067	1.74821	B103-S1
9	79952170	80430769	2.14348	B103-S1
9	80430808	80866858	1.52354	B103-S1
9	80866958	81652399	1.9906	B103-S1
9	82006272	83349338	2.48125	B103-S1
9	83349433	84703786	1.84941	B103-S1
9	84746188	86275322	2.19522	B103-S1
9	86275422	86955656	1.72201	B103-S1
9	87284269	88201876	2.41897	B103-S1
9	88284582	89561074	1.68573	B103-S1
9	89561174	90502429	2.0201	B103-S1
9	90502529	90589079	1.59967	B103-S1
9	90589284	91041649	1.22688	B103-S1
9	91063827	96800511	1.86464	B103-S1
9	96800611	97563332	1.54033	B103-S1
9	97565026	97912417	2.15253	B103-S1
9	97933298	98244517	1.69858	B103-S1
9	98244555	98909733	2.25395	B103-S1
9	98909833	101765965	1.77599	B103-S1
X	100104851	100486634	1.30884	B103-S1
X	100486734	100794103	1.65762	B103-S1
X	100807924	103498857	1.96733	B103-S1
X	103498957	106411042	2.24897	B103-S1
X	106418244	107084499	1.74314	B103-S1
X	107084668	114524481	2.19821	B103-S1
X	114536548	115303644	1.59106	B103-S1
X	115303721	117054407	2.15085	B103-S1
X	117079349	119246813	1.55237	B103-S1
X	119246896	119603086	2.01003	B103-S1
X	119658531	120466646	1.59536	B103-S1
X	121605430	122658248	2.37363	B103-S1
X	122658348	123499670	1.66309	B103-S1
X	123499740	128580890	2.28461	B103-S1
X	128580924	128977386	1.90213	B103-S1
X	128993642	129273805	1.47978	B103-S1
X	129274544	129813744	1.8534	B103-S1
X	129822930	131760167	2.29011	B103-S1
X	131760267	134095312	1.65534	B103-S1
X	134125112	134807451	2.20873	B103-S1
X	134807521	135443883	1.69481	B103-S1
X	135445670	135829798	2.10628	B103-S1
X	135861581	137713949	1.50272	B103-S1
X	137714151	147546564	2.12148	B103-S1
X	147546656	148564685	2.71022	B103-S1
X	148586614	152514941	2.10103	B103-S1
X	152614968	153941655	1.67678	B103-S1
X	153941728	155171434	1.96793	B103-S1
X	155171534	155257139	2.76251	B103-S1
X	15706835	17166420	1.70973	B103-S1
X	17167065	17879463	2.30913	B103-S1
X	18189214	20195302	1.71531	B103-S1
X	200856	3202089	1.37757	B103-S1
X	20204466	21761986	2.39019	B103-S1
X	21772335	23722824	1.93405	B103-S1
X	23802069	24330045	1.37192	B103-S1
X	24330145	24806694	1.69445	B103-S1
X	24806794	39520480	2.12623	B103-S1
X	3202189	6452378	1.77708	B103-S1
X	39646915	42637294	1.51203	B103-S1
X	43137546	44107788	2.28043	B103-S1
X	44107997	49646502	1.55182	B103-S1
X	49646603	50112012	1.98123	B103-S1
X	50113387	50213513	2.59627	B103-S1
X	50213613	51079202	2.0438	B103-S1
X	51486929	64959837	1.68616	B103-S1
X	65176720	67412877	2.22466	B103-S1
X	67413710	69715387	1.8016	B103-S1
X	6967510	15682966	2.09736	B103-S1
X	69717023	70824631	1.41977	B103-S1
X	70825523	77394478	1.70361	B103-S1
X	77528842	99926017	2.1728	B103-S1
X	99930233	100104751	1.77819	B103-S1
Y	15026462	28661877	1.95824	B103-S1
Y	2655350	2847935	1.51553	B103-S1
Y	2848035	9160050	2.01084	B103-S1
Y	28661977	59002606	1.37804	B103-S1
Y	9160146	15025788	1.62151	B103-S1
1	13090	259278	2.71677	B103-S2
1	64475139	64732965	3.14547	B103-S2
1	64936653	249231502	1.91845	B103-S2
1	743879	64475091	1.87796	B103-S2
10	135291509	135491156	1.19135	B103-S2
10	39079522	42528142	1.76191	B103-S2
10	42680658	135270020	0.874868	B103-S2
10	93088	39076506	0.883249	B103-S2
11	111865751	111934887	1.61203	B103-S2
11	111934979	118661728	1.91485	B103-S2
11	118661777	118773983	1.53192	B103-S2
11	118774083	134606023	1.91982	B103-S2
11	15243185	16424345	2.26694	B103-S2
11	16424445	67938967	1.89054	B103-S2
11	404128	15222578	1.89594	B103-S2
11	68131133	68204482	1.38069	B103-S2
11	68205983	111796495	1.9082	B103-S2
11	86924	400005	1.96481	B103-S2
12	124163720	124210888	1.52454	B103-S2
12	124228813	133780910	1.88093	B103-S2
12	247499	49217032	1.90067	B103-S2
12	49217132	49239548	2.37801	B103-S2
12	49251025	80423217	1.90052	B103-S2
12	67845	208426	2.3583	B103-S2
12	80423317	80729675	1.62275	B103-S2
12	80729775	124158412	1.90211	B103-S2
13	113819425	113873434	2.36528	B103-S2
13	113873491	115092819	1.87758	B103-S2
13	19041945	113795275	1.94093	B103-S2
14	104473382	104638906	1.58712	B103-S2
14	104639006	105268322	1.85523	B103-S2
14	105268422	105351720	1.37782	B103-S2
14	105351820	107283323	1.87651	B103-S2
14	19110159	23902023	1.92217	B103-S2
14	23902287	24113968	1.64029	B103-S2
14	24114068	34269234	1.91986	B103-S2
14	34931371	35181742	2.2873	B103-S2
14	35181913	91633650	1.93066	B103-S2
14	91633750	91924474	1.58097	B103-S2
14	91924690	104473282	1.89821	B103-S2
15	20083724	42372038	1.86606	B103-S2
15	42373197	42438289	1.41425	B103-S2
15	42455503	72543145	1.90557	B103-S2
15	72543245	72608333	2.29577	B103-S2
15	72612070	72690829	1.4871	B103-S2
15	72691147	102516822	1.88114	B103-S2
16	18407313	18488499	1.47581	B103-S2
16	18562627	89628785	1.86716	B103-S2
16	313706	18407213	1.83363	B103-S2
16	61923	312564	2.09795	B103-S2
16	89629274	89755822	1.48318	B103-S2
16	89757029	90291239	1.91179	B103-S2
17	33749595	33819863	1.54072	B103-S2
17	33820146	41347179	1.85878	B103-S2
17	41365069	41553948	1.39466	B103-S2
17	41568573	44845822	1.86494	B103-S2
17	44845922	45110895	1.48499	B103-S2
17	45110933	48542344	1.8806	B103-S2
17	48542444	48598660	1.50012	B103-S2
17	48598840	67125017	1.8894	B103-S2
17	6088	7211969	1.8445	B103-S2
17	67125766	67183832	2.42667	B103-S2
17	67183932	72351528	1.88253	B103-S2
17	7212920	7909911	0.869515	B103-S2
17	72351563	72462776	1.40538	B103-S2
17	72462876	76181304	1.83732	B103-S2
17	76182877	76227996	2.39721	B103-S2
17	76230034	81188353	1.84223	B103-S2
17	7950950	33738584	1.86693	B103-S2
18	12936	59713327	1.92447	B103-S2
18	59739873	59806388	2.41739	B103-S2
18	59807678	78005320	1.9736	B103-S2
19	52994591	54072723	1.92674	B103-S2
19	54074814	54466506	2.97051	B103-S2
19	54481359	54606204	1.95837	B103-S2
19	54649468	54677975	2.32447	B103-S2
19	54678075	55631200	1.78874	B103-S2
19	55644230	58132637	2.9917	B103-S2
19	58132737	58231825	1.94227	B103-S2
19	58231925	58288167	3.18341	B103-S2
19	58290153	58904901	2.80915	B103-S2
19	58905909	59110742	3.37194	B103-S2
19	60747	52961559	2.87576	B103-S2
2	14393	65540999	1.92153	B103-S2
2	160826651	160901666	2.41502	B103-S2
2	160918698	231193588	1.96439	B103-S2
2	231193662	231265085	1.04257	B103-S2
2	231265604	243081300	1.86834	B103-S2
2	65544038	66670680	2.34649	B103-S2
2	66689334	160826022	1.91767	B103-S2
20	10621825	12362133	3.48884	B103-S2
20	12362233	29614510	2.99226	B103-S2
20	29614608	29862315	2.28256	B103-S2
20	29873023	50287828	2.91745	B103-S2
20	50290726	50705142	2.37525	B103-S2
20	50769584	54987683	2.98408	B103-S2
20	55012184	55206820	2.52898	B103-S2
20	55206920	55803416	3.06654	B103-S2
20	55803476	56098734	3.91054	B103-S2
20	56099158	60790449	3.03688	B103-S2
20	60790549	62958934	2.80982	B103-S2
20	68358	10621725	2.94682	B103-S2
21	27253998	28213313	2.27947	B103-S2
21	28213413	47539136	1.88207	B103-S2
21	47539583	47588337	1.48665	B103-S2
21	47588437	47987491	1.84844	B103-S2
21	9459944	27253831	1.90976	B103-S2
22	16084904	51237655	1.84533	B103-S2
3	100082317	100378817	1.639	B103-S2
3	100380374	133105394	1.93983	B103-S2
3	133302823	172607369	1.97041	B103-S2
3	172607469	173999939	2.26284	B103-S2
3	174000039	196509450	1.91476	B103-S2
3	196612631	196678788	2.26059	B103-S2
3	196678888	197913330	1.88748	B103-S2
3	239424	53263274	1.88875	B103-S2
3	53264416	53508957	1.55997	B103-S2
3	53529034	100074266	1.94869	B103-S2
4	166024051	166220631	0.90639	B103-S2
4	166220731	191040528	1.93939	B103-S2
4	23054	533174	2.04122	B103-S2
4	619405	731320	1.60677	B103-S2
4	6998043	7382144	2.27063	B103-S2
4	737269	6883385	1.86338	B103-S2
4	7382244	166022144	1.95648	B103-S2
5	154197274	154278009	1.56622	B103-S2
5	154278130	169672924	1.9471	B103-S2
5	169673024	169715147	2.36592	B103-S2
5	169720199	180754137	1.88111	B103-S2
5	42767	55246029	1.92442	B103-S2
5	55246106	55800902	1.58854	B103-S2
5	55807605	80639679	1.93157	B103-S2
5	80639779	80742802	1.54521	B103-S2
5	80742871	154197174	1.95326	B103-S2
6	109585916	109662744	1.52439	B103-S2
6	109663735	162208466	1.94813	B103-S2
6	145688	31774633	1.92296	B103-S2
6	162372616	165990030	0.958272	B103-S2
6	166074177	171049067	1.92898	B103-S2
6	31777778	31827160	2.5932	B103-S2
6	31827608	109583293	1.93092	B103-S2
7	141762537	141794466	3.81398	B103-S2
7	141794566	143095601	2.98795	B103-S2
7	143095701	143573746	2.54957	B103-S2
7	143632354	159026181	2.93553	B103-S2
7	19761	5939919	2.8755	B103-S2
7	55001138	55268328	16.5626	B103-S2
7	55270117	55279513	17.2138	B103-S2
7	55326716	56357919	2.9793	B103-S2
7	56358019	56636508	2.2455	B103-S2
7	56665174	56878971	3.02227	B103-S2
7	57068950	57194570	3.57369	B103-S2
7	57199822	141762437	2.96931	B103-S2
7	5940019	6017484	2.17038	B103-S2
7	6018284	54827072	3.02481	B103-S2
8	10177470	10512350	1.57437	B103-S2
8	10512450	22064536	1.90002	B103-S2
8	146106897	146203779	2.284	B103-S2
8	22064642	22267659	1.53038	B103-S2
8	22267728	146067880	1.93091	B103-S2
8	327961	7308425	1.90621	B103-S2
8	7308525	7438306	1.54691	B103-S2
8	7442471	10177370	1.88606	B103-S2
9	100075587	100190855	1.61203	B103-S2
9	100190955	115216480	1.92875	B103-S2
9	115216572	115421565	1.41688	B103-S2
9	115421665	140204199	1.86386	B103-S2
9	12769	21015877	1.95982	B103-S2
9	140218153	140328520	1.28892	B103-S2
9	140328620	141109984	1.83889	B103-S2
9	21239638	21368956	1.07726	B103-S2
9	21368993	26114516	0.868296	B103-S2
9	26116040	26962152	1.99014	B103-S2
9	26978106	27525006	0.866365	B103-S2
9	29824782	35028139	1.87708	B103-S2
9	35028239	35076993	2.25059	B103-S2
9	35077193	90584878	1.90449	B103-S2
9	90585510	91026003	1.58317	B103-S2
9	91041423	100074542	1.88631	B103-S2
X	118894062	119209962	1.5126	B103-S2
X	119211095	155127691	1.87396	B103-S2
X	155127791	155257139	2.29992	B103-S2
X	16888258	17166420	1.51245	B103-S2
X	17167065	19431651	1.92971	B103-S2
X	19433263	19983316	1.65357	B103-S2
X	19983416	24226570	2.01852	B103-S2
X	200856	16887712	1.89771	B103-S2
X	24226952	24806794	1.71779	B103-S2
X	24806894	32364133	1.96426	B103-S2
X	32364233	32503062	2.43294	B103-S2
X	32503162	53449668	1.86132	B103-S2
X	53449768	53611350	1.55841	B103-S2
X	53612126	118893962	1.8834	B103-S2
Y	2655350	9214625	1.84117	B103-S2
Y	9216538	9388252	1.47641	B103-S2
Y	9388352	59002563	1.86391	B103-S2
1	113213283	113467096	1.31106	B103-S3
1	113470042	142621390	2.00977	B103-S3
1	13090	663176	2.34928	B103-S3
1	142667193	143393988	1.30846	B103-S3
1	143394088	146553971	1.60884	B103-S3
1	146554623	146716035	2.15788	B103-S3
1	146716107	173835206	1.75977	B103-S3
1	173835306	173915829	1.3985	B103-S3
1	173915929	202849737	2.01723	B103-S3
1	202880192	232561342	1.87416	B103-S3
1	232564375	232650890	2.63492	B103-S3
1	232650990	249231502	1.84197	B103-S3
1	36028067	64515281	1.71464	B103-S3
1	64515381	65016483	3.21051	B103-S3
1	65047797	66038301	1.98805	B103-S3
1	66062080	70700532	2.19483	B103-S3
1	664521	35944694	1.5916	B103-S3
1	70701129	70742378	1.46063	B103-S3
1	70742478	113212958	2.03009	B103-S3
10	49291786	50701278	1.16908	B103-S3
10	50701378	51826512	0.665335	B103-S3
10	51877502	51978346	0.267456	B103-S3
10	52002961	135455035	0.834687	B103-S3
10	61648	49226558	0.820152	B103-S3
11	101637214	102737240	1.9854	B103-S3
11	102745552	107299819	2.35938	B103-S3
11	107299919	107677489	1.95552	B103-S3
11	107677589	108345703	1.4551	B103-S3
11	108348314	111845742	1.93699	B103-S3
11	10876092	14276201	2.23555	B103-S3
11	111848420	111959543	1.512	B103-S3
11	111959643	113604665	2.08174	B103-S3
11	113607272	113934306	1.66002	B103-S3
11	113934526	115822279	2.17117	B103-S3
11	116618970	119503553	1.5951	B103-S3
11	119508893	122484441	2.08197	B103-S3
11	122667583	123477398	1.63339	B103-S3
11	123480883	124252448	2.3752	B103-S3
11	124252548	130318977	1.96981	B103-S3
11	130715927	134606023	2.16364	B103-S3
11	14276301	14541093	1.7804	B103-S3
11	14541796	15267610	2.17514	B103-S3
11	15267866	16424445	3.02532	B103-S3
11	16805498	17428907	1.61734	B103-S3
11	17429007	18134367	2.02046	B103-S3
11	18134625	18993352	1.6234	B103-S3
11	18993890	20674152	2.10204	B103-S3
11	20676213	27016961	2.47645	B103-S3
11	2398842	2924755	2.25297	B103-S3
11	27017061	27828154	1.99889	B103-S3
11	27828194	31812384	2.38686	B103-S3
11	2924801	4389254	1.6897	B103-S3
11	31812484	33563790	1.62722	B103-S3
11	33563890	34122646	1.97834	B103-S3
11	34122746	34378325	1.54014	B103-S3
11	34378425	34546436	2.1041	B103-S3
11	34643918	35338916	2.47823	B103-S3
11	35461108	46391667	1.94221	B103-S3
11	4389354	5269748	2.48706	B103-S3
11	46392865	48238374	1.4621	B103-S3
11	48328594	49092168	1.86692	B103-S3
11	49092268	50149670	2.27289	B103-S3
11	50205708	55135490	1.67765	B103-S3
11	5269820	7083857	2.11592	B103-S3
11	55135590	56955583	2.31501	B103-S3
11	57003351	57876425	1.52556	B103-S3
11	57876454	60899556	2.04218	B103-S3
11	60899656	78399378	1.61854	B103-S3
11	7091477	7488465	2.95505	B103-S3
11	7488565	7652127	2.14233	B103-S3
11	7720315	10875992	1.81258	B103-S3
11	78412703	82561557	2.42585	B103-S3
11	82564207	83191596	1.91382	B103-S3
11	83191696	84732786	2.44398	B103-S3
11	84732857	86267718	2.02225	B103-S3
11	86270768	86656876	2.58345	B103-S3
11	86656976	87030305	1.84934	B103-S3
11	86942	2357019	1.56671	B103-S3
11	87030405	89177399	2.51769	B103-S3
11	89177489	94501592	1.95465	B103-S3
11	94501692	101574241	2.32961	B103-S3
12	100403428	101011747	1.69158	B103-S3
12	101012152	101562010	2.33186	B103-S3
12	101596060	101728310	1.97834	B103-S3
12	101728335	102455029	1.62607	B103-S3
12	102455129	104133338	2.20002	B103-S3
12	104133378	113711134	1.65209	B103-S3
12	113711437	113735471	1.19932	B103-S3
12	113737735	115026340	1.89653	B103-S3
12	115026486	115120410	1.26179	B103-S3
12	115120510	117905548	1.87358	B103-S3
12	117969561	124338032	1.44731	B103-S3
12	12131595	13095264	1.56133	B103-S3
12	124341562	125453064	1.78865	B103-S3
12	125453196	125603419	1.30377	B103-S3
12	125609247	132398427	1.86756	B103-S3
12	13228944	13716508	2.0913	B103-S3
12	132398873	133810941	1.51783	B103-S3
12	13716933	14538381	2.67257	B103-S3
12	14576850	15091205	1.84955	B103-S3
12	15091305	15622600	2.53008	B103-S3
12	15636918	16342873	2.07833	B103-S3
12	16347214	19408009	2.47543	B103-S3
12	1909514	2742964	2.1665	B103-S3
12	19408109	20094958	1.67592	B103-S3
12	20095152	25147265	2.28977	B103-S3
12	247499	549928	1.78474	B103-S3
12	25173780	27844943	1.99767	B103-S3
12	2743499	3678657	1.57895	B103-S3
12	27845528	27944608	1.45657	B103-S3
12	27944708	31253775	2.12155	B103-S3
12	31253883	31291407	1.46026	B103-S3
12	31291944	31448328	1.78143	B103-S3
12	31450940	33022048	1.41838	B103-S3
12	33559801	42604400	2.20255	B103-S3
12	3678757	5860039	2.07334	B103-S3
12	42611005	42863332	1.58165	B103-S3
12	42863432	44148415	2.5766	B103-S3
12	44148515	44402723	1.96911	B103-S3
12	44513919	45795885	2.46424	B103-S3
12	45796859	48866757	2.01556	B103-S3
12	48866857	49522181	1.53445	B103-S3
12	49522281	49906829	1.19816	B103-S3
12	49908309	50571013	1.5263	B103-S3
12	50571113	50744927	1.09987	B103-S3
12	50749734	51797220	1.51745	B103-S3
12	51834443	52200641	2.01734	B103-S3
12	52200741	52623155	1.61489	B103-S3
12	52652009	53216997	2.03904	B103-S3
12	53217604	54058926	1.50599	B103-S3
12	54059026	54383470	2.14256	B103-S3
12	54383629	55038711	1.60604	B103-S3
12	550028	668423	1.22893	B103-S3
12	55038811	56109983	2.0722	B103-S3
12	56110683	58378439	1.58639	B103-S3
12	58378511	62783361	2.33162	B103-S3
12	5860139	7286086	1.61422	B103-S3
12	62783461	64522030	1.90197	B103-S3
12	64536144	65224419	1.52606	B103-S3
12	65225879	69044317	2.03187	B103-S3
12	668523	1909392	1.77378	B103-S3
12	67845	208426	2.4739	B103-S3
12	69044417	70078435	1.65804	B103-S3
12	70087454	72355595	2.12754	B103-S3
12	72366235	76082800	2.52237	B103-S3
12	7286186	7760088	2.02034	B103-S3
12	76082900	78392011	1.86437	B103-S3
12	7760137	9083582	1.54507	B103-S3
12	78392111	79894460	2.29922	B103-S3
12	79952718	80648864	1.8287	B103-S3
12	80648964	89565707	2.36777	B103-S3
12	89565807	89917593	1.85653	B103-S3
12	89917693	91346013	2.35322	B103-S3
12	9085200	12123978	2.0688	B103-S3
12	91346111	91449650	3.22428	B103-S3
12	91449750	93236398	2.11557	B103-S3
12	93244879	94243856	1.58454	B103-S3
12	94243956	95365574	2.00777	B103-S3
12	95388008	95922862	1.4795	B103-S3
12	95926620	97159114	1.80029	B103-S3
12	97178523	98389246	2.34486	B103-S3
12	98711761	99226085	1.6006	B103-S3
12	99239641	100042424	2.47492	B103-S3
13	101707796	103303790	1.97636	B103-S3
13	103307293	113526120	1.7185	B103-S3
13	113526220	113824580	1.32362	B103-S3
13	113824680	113897526	1.67991	B103-S3
13	113898684	114115471	1.09192	B103-S3
13	114117144	115092819	1.48377	B103-S3
13	19041945	22096874	1.37825	B103-S3
13	23270051	28592827	1.84598	B103-S3
13	28592927	28644555	1.16106	B103-S3
13	28644655	33350940	1.85737	B103-S3
13	33351040	36241539	2.35273	B103-S3
13	36241639	40792949	1.83689	B103-S3
13	40793007	46287746	1.55938	B103-S3
13	46287846	46700214	1.9865	B103-S3
13	46700285	49056286	1.52953	B103-S3
13	49064243	49619919	2.05096	B103-S3
13	49649415	50065117	1.58011	B103-S3
13	50065798	50623164	1.21868	B103-S3
13	50623264	53422541	1.60188	B103-S3
13	53422641	60499136	2.15044	B103-S3
13	60499191	61211432	1.65349	B103-S3
13	61984790	72440998	2.13678	B103-S3
13	73277931	95055498	1.77702	B103-S3
13	95055598	96293610	1.38217	B103-S3
13	96415927	98120162	1.83139	B103-S3
13	98120222	101707696	1.48047	B103-S3
14	102309579	104583676	1.5182	B103-S3
14	104583776	105169877	1.9757	B103-S3
14	105170176	105946084	1.59789	B103-S3
14	105952839	106414755	1.72611	B103-S3
14	106436075	107283323	2.37693	B103-S3
14	19110159	19192825	1.39742	B103-S3
14	19377977	20097360	1.79385	B103-S3
14	20098205	20819297	2.12362	B103-S3
14	20820371	22218051	1.65784	B103-S3
14	22219752	23240255	2.14511	B103-S3
14	23240355	23548280	1.43202	B103-S3
14	23548768	24912105	1.75306	B103-S3
14	24974764	31204103	2.18119	B103-S3
14	31204743	31539181	1.81488	B103-S3
14	31583482	31819213	1.33554	B103-S3
14	31819309	32296026	1.77875	B103-S3
14	32315615	34820254	2.22628	B103-S3
14	34820354	36337035	1.58124	B103-S3
14	36337135	39501785	2.18779	B103-S3
14	39501885	39769028	1.4483	B103-S3
14	39769128	41818583	1.78371	B103-S3
14	42077594	45332443	2.50586	B103-S3
14	45332543	47120305	1.79754	B103-S3
14	47120405	48129694	2.6723	B103-S3
14	49289057	50792418	1.49458	B103-S3
14	50792518	55251352	1.96428	B103-S3
14	55251431	55903677	1.615	B103-S3
14	55903771	57052678	2.14627	B103-S3
14	57052734	57670612	1.69471	B103-S3
14	57670712	58471939	2.19484	B103-S3
14	58472035	59464790	1.74652	B103-S3
14	59465013	63758601	2.1856	B103-S3
14	63758629	65213654	1.6006	B103-S3
14	65213754	66191018	1.93482	B103-S3
14	66758208	67382899	2.41356	B103-S3
14	67388973	70263727	1.77043	B103-S3
14	70347265	70714152	2.33602	B103-S3
14	70714252	73360894	1.94471	B103-S3
14	73360959	78399832	1.56851	B103-S3
14	78709484	81574969	2.35667	B103-S3
14	81606002	82000220	1.76741	B103-S3
14	82127854	88658798	2.36283	B103-S3
14	88693677	92466302	1.73877	B103-S3
14	92466402	92555352	1.30342	B103-S3
14	92559657	93485261	1.8044	B103-S3
14	93534100	93706159	1.328	B103-S3
14	93706213	102309314	1.92073	B103-S3
15	20083724	20209277	1.69532	B103-S3
15	20210279	20363672	1.08462	B103-S3
15	20364327	22151777	1.58019	B103-S3
15	22151877	22647225	2.25177	B103-S3
15	22657999	23684812	1.45547	B103-S3
15	23684912	28408273	2.04581	B103-S3
15	28408373	28771060	1.59911	B103-S3
15	28771160	28899295	1.19733	B103-S3
15	28899395	31667226	1.67035	B103-S3
15	31793867	32676706	2.02448	B103-S3
15	32677106	32890687	1.52047	B103-S3
15	32895324	34103224	2.07152	B103-S3
15	34105045	37184299	1.82541	B103-S3
15	37184399	38229193	2.74024	B103-S3
15	38229293	40066931	2.1651	B103-S3
15	40067479	43901641	1.58481	B103-S3
15	43901707	45431602	1.49607	B103-S3
15	45431702	45777510	1.85251	B103-S3
15	45777574	47873688	1.49308	B103-S3
15	48022389	50489731	2.32438	B103-S3
15	50489831	50751475	1.75142	B103-S3
15	50754421	51285488	1.38056	B103-S3
15	51285588	52098720	2.02002	B103-S3
15	52100513	53050085	1.6849	B103-S3
15	53081002	55475681	2.54432	B103-S3
15	55477479	56130484	1.55175	B103-S3
15	56130669	59080212	2.00858	B103-S3
15	59080312	60648175	1.65498	B103-S3
15	60649374	64966969	1.8928	B103-S3
15	64967069	64981313	1.14022	B103-S3
15	64981381	79350848	1.69456	B103-S3
15	79356776	82302878	2.05501	B103-S3
15	82334035	85664051	1.70701	B103-S3
15	85664151	85958465	1.38629	B103-S3
15	85958543	86600465	1.95006	B103-S3
15	86623205	88690673	2.41005	B103-S3
15	88726579	91486414	1.62019	B103-S3
15	91488076	91548405	2.04623	B103-S3
15	91548505	91577501	1.49757	B103-S3
15	91577601	93173586	2.28154	B103-S3
15	93198593	93595840	1.84511	B103-S3
15	93974216	98932895	2.36012	B103-S3
15	99029079	102516822	1.86544	B103-S3
16	10524413	14397937	1.63988	B103-S3
16	14702036	16492401	1.38772	B103-S3
16	16492501	18415143	1.71909	B103-S3
16	18475508	18484970	1.00027	B103-S3
16	18487001	20335518	1.49626	B103-S3
16	20422866	20975043	1.88654	B103-S3
16	20975117	29127675	1.48219	B103-S3
16	29127719	29398032	1.96867	B103-S3
16	29398132	29680669	1.11345	B103-S3
16	29825888	34956874	1.59762	B103-S3
16	35037203	46482544	1.26828	B103-S3
16	46491107	47117357	1.65586	B103-S3
16	47117457	48180274	2.08857	B103-S3
16	48180374	56389016	1.89672	B103-S3
16	5145787	5340152	1.03933	B103-S3
16	56390043	56468486	1.54375	B103-S3
16	56468586	56832496	1.93308	B103-S3
16	56839303	58757731	1.583	B103-S3
16	5810706	7949398	2.34953	B103-S3
16	58757793	66471640	2.33946	B103-S3
16	66503593	71100882	1.46741	B103-S3
16	67990	5145687	1.53597	B103-S3
16	71100982	71318104	2.2365	B103-S3
16	71482827	71660378	1.82744	B103-S3
16	71663202	71987059	1.39508	B103-S3
16	71988069	74334087	1.8966	B103-S3
16	74334187	74950266	1.32765	B103-S3
16	74951841	75742987	1.66375	B103-S3
16	76269039	81015596	2.14756	B103-S3
16	7949498	9857823	1.62125	B103-S3
16	81030887	81655362	1.50824	B103-S3
16	81685821	81971381	1.88333	B103-S3
16	82034369	83158959	2.46602	B103-S3
16	83159059	85942577	1.59905	B103-S3
16	85942677	87350916	2.0091	B103-S3
16	87351006	90291239	1.60712	B103-S3
16	9857923	10275804	2.16953	B103-S3
17	15469146	16827476	1.47282	B103-S3
17	16827576	17070438	1.96669	B103-S3
17	17119749	30965972	1.57899	B103-S3
17	30980864	31618781	1.95465	B103-S3
17	31618881	32964527	2.37991	B103-S3
17	32964592	35692549	1.68908	B103-S3
17	35692649	38792518	1.46641	B103-S3
17	38792634	39616594	1.99247	B103-S3
17	39619149	49371253	1.49916	B103-S3
17	49371353	54446740	2.26288	B103-S3
17	54446840	60304508	1.64721	B103-S3
17	60307360	60751644	1.29062	B103-S3
17	60753106	62080114	1.65092	B103-S3
17	6088	7211969	1.48363	B103-S3
17	62080214	62230262	2.10112	B103-S3
17	62230362	66551092	1.5265	B103-S3
17	66551734	67270143	2.12454	B103-S3
17	67270243	67517264	1.61032	B103-S3
17	67944925	70118091	2.20301	B103-S3
17	70118165	76399678	1.54558	B103-S3
17	7212920	7852917	0.634885	B103-S3
17	76399784	76446165	0.879045	B103-S3
17	76446466	78449527	1.59248	B103-S3
17	78519560	79005291	1.96494	B103-S3
17	79005369	80858484	1.53293	B103-S3
17	7907286	7948786	1.26282	B103-S3
17	7948886	8814860	1.70214	B103-S3
17	80858584	81052410	1.90111	B103-S3
17	8927322	9546745	1.31891	B103-S3
17	9549267	15469046	1.82244	B103-S3
18	11619893	12999412	1.55327	B103-S3
18	12999512	15316898	1.99225	B103-S3
18	18540144	19153641	1.37752	B103-S3
18	19153741	22057590	1.74493	B103-S3
18	22642623	23714128	2.22628	B103-S3
18	23720031	24436170	1.72556	B103-S3
18	24436270	29115354	2.30577	B103-S3
18	29115453	30252561	1.69331	B103-S3
18	30252661	32457855	2.54354	B103-S3
18	32459511	43214776	2.19508	B103-S3
18	3870752	6837306	2.23984	B103-S3
18	43214876	43844677	1.64436	B103-S3
18	43844990	44526841	2.07424	B103-S3
18	44526941	44626603	1.38342	B103-S3
18	44626703	48611559	1.93012	B103-S3
18	48701827	51053135	2.46907	B103-S3
18	51056689	52610135	1.92376	B103-S3
18	52896205	53017688	2.75913	B103-S3
18	53017751	54591233	2.0071	B103-S3
18	54591333	55035216	2.41406	B103-S3
18	55103667	55274932	1.78598	B103-S3
18	55276576	55711939	1.41657	B103-S3
18	55711996	57792219	1.81969	B103-S3
18	57792341	59925393	2.19955	B103-S3
18	59925669	61011820	1.86331	B103-S3
18	61018096	70526352	2.27963	B103-S3
18	6837406	7232019	1.71403	B103-S3
18	70526444	74207681	1.84638	B103-S3
18	7232119	8248017	2.56827	B103-S3
18	74207781	77894038	1.50674	B103-S3
18	77894269	78005320	1.9645	B103-S3
18	80029	3870652	1.72409	B103-S3
18	8248117	11619808	1.94286	B103-S3
19	13184269	13323587	2.79247	B103-S3
19	13323664	14963434	2.16044	B103-S3
19	14963534	15133812	2.73888	B103-S3
19	15133837	15508585	2.27385	B103-S3
19	15508685	16060813	2.64849	B103-S3
19	16060867	19843752	2.24341	B103-S3
19	19843850	24345391	2.67096	B103-S3
19	28246372	30165139	3.18187	B103-S3
19	30165584	30315242	2.22841	B103-S3
19	30412348	30936035	2.74161	B103-S3
19	30936135	31770724	3.33259	B103-S3
19	31770824	33370127	2.4546	B103-S3
19	33370227	33600707	1.96275	B103-S3
19	33600871	41762348	2.3734	B103-S3
19	41763422	45153166	2.73459	B103-S3
19	45153401	48339669	2.31632	B103-S3
19	48339728	48517546	1.60818	B103-S3
19	48517642	52961559	2.36135	B103-S3
19	52994591	54006994	1.5301	B103-S3
19	54072623	54481559	2.23174	B103-S3
19	54481589	55283035	1.6276	B103-S3
19	55283135	55631200	1.27616	B103-S3
19	55644230	56180627	2.52053	B103-S3
19	56244211	56600116	2.18146	B103-S3
19	56600216	58288088	2.65502	B103-S3
19	58288167	58870779	2.2149	B103-S3
19	58870879	59010999	2.66506	B103-S3
19	59060661	59110742	3.18947	B103-S3
19	60747	13184020	2.28012	B103-S3
2	113955499	114035993	2.4098	B103-S3
2	114036093	131379335	1.79344	B103-S3
2	131379435	131414166	0.935394	B103-S3
2	131414266	171192039	2.13523	B103-S3
2	14393	50106574	1.79921	B103-S3
2	171225755	174047611	1.81425	B103-S3
2	174097047	242291655	1.98671	B103-S3
2	242344092	243081300	1.55537	B103-S3
2	50147571	53927673	2.55654	B103-S3
2	53941547	54482407	1.67712	B103-S3
2	54608941	55098798	2.54899	B103-S3
2	55106545	56210398	1.76351	B103-S3
2	56215999	59504848	2.68278	B103-S3
2	60679693	65541333	1.70094	B103-S3
2	65543838	67640320	2.49279	B103-S3
2	68270099	92119701	1.82911	B103-S3
2	92119801	92325327	1.27428	B103-S3
2	95334429	113820267	1.82416	B103-S3
20	13567856	14067027	2.52336	B103-S3
20	14069714	17823444	3.34391	B103-S3
20	17823541	18038171	2.56018	B103-S3
20	18038271	18162718	1.96647	B103-S3
20	18163942	18529339	2.68009	B103-S3
20	18529439	25062228	3.17156	B103-S3
20	2378642	4778697	2.57637	B103-S3
20	251825	944458	2.40088	B103-S3
20	25195636	25755974	2.77094	B103-S3
20	25840648	36032901	2.42233	B103-S3
20	36032966	36769740	2.99381	B103-S3
20	36769840	40102053	2.68232	B103-S3
20	40102153	42086865	3.35274	B103-S3
20	42087676	43247090	2.35913	B103-S3
20	43247626	44333762	2.91294	B103-S3
20	44333854	44674750	2.49791	B103-S3
20	44675040	45169881	2.94671	B103-S3
20	45169961	45250198	3.64137	B103-S3
20	45315361	47258708	2.45055	B103-S3
20	47258808	47538461	3.15252	B103-S3
20	47538561	51588822	2.45816	B103-S3
20	4778797	4866600	1.81383	B103-S3
20	5099384	5939506	2.57873	B103-S3
20	51589969	51873064	3.04704	B103-S3
20	51873164	52611604	2.43188	B103-S3
20	52611700	54958172	3.09677	B103-S3
20	54958272	55099947	2.47823	B103-S3
20	55100047	55497245	1.88333	B103-S3
20	55497291	56227102	3.54998	B103-S3
20	56227202	57769330	2.96025	B103-S3
20	57769430	60148401	3.50673	B103-S3
20	5943935	13561705	3.33919	B103-S3
20	60509467	60866937	2.5555	B103-S3
20	60868857	60927215	2.03904	B103-S3
20	60927315	62958934	2.58581	B103-S3
20	944571	2378542	3.2532	B103-S3
21	14470198	15382072	1.82534	B103-S3
21	15382640	15985317	2.49663	B103-S3
21	15985374	16340458	1.96055	B103-S3
21	16340558	17764028	2.48231	B103-S3
21	17911422	19169154	1.74631	B103-S3
21	19169254	27608231	2.16801	B103-S3
21	28296811	29645998	2.65891	B103-S3
21	30248707	30426588	1.6835	B103-S3
21	30428790	32253770	2.17949	B103-S3
21	32253870	38567991	1.68102	B103-S3
21	38568091	45795945	1.78039	B103-S3
21	45795979	45842280	0.737334	B103-S3
21	45855054	45951069	1.70859	B103-S3
21	45994650	46086698	2.26207	B103-S3
21	46086867	47692596	1.76167	B103-S3
21	47692696	47965356	1.37203	B103-S3
21	47965805	48101014	1.96055	B103-S3
21	9459944	14470098	1.45373	B103-S3
22	16084904	23029824	1.63161	B103-S3
22	23040460	23468482	2.12385	B103-S3
22	23473815	32880202	1.5837	B103-S3
22	32880974	33257712	2.0575	B103-S3
22	33257812	40064405	1.57787	B103-S3
22	40064438	40283762	2.15207	B103-S3
22	40283849	44287774	1.498	B103-S3
22	44371993	44564670	1.97526	B103-S3
22	44677679	46067923	1.55499	B103-S3
22	46067978	46641244	2.02292	B103-S3
22	46642670	47083098	1.51519	B103-S3
22	47085870	50957262	1.69438	B103-S3
22	50957604	50968172	1.32257	B103-S3
22	50968862	51237655	1.83361	B103-S3
3	108557730	109635621	1.65883	B103-S3
3	110401118	111357073	2.67902	B103-S3
3	111366346	143214407	1.92472	B103-S3
3	143271167	179051530	2.11462	B103-S3
3	179052383	190322205	1.75715	B103-S3
3	18055262	19551820	2.77067	B103-S3
3	190322293	190433197	3.08251	B103-S3
3	190434207	195300823	1.98871	B103-S3
3	195389665	197913330	1.55214	B103-S3
3	19551920	20195950	1.813	B103-S3
3	20212228	31774974	2.1366	B103-S3
3	239424	4872763	2.23341	B103-S3
3	31789411	33896922	1.64224	B103-S3
3	33905588	36422381	2.71439	B103-S3
3	36524422	47038136	1.89153	B103-S3
3	47038891	57132294	1.58362	B103-S3
3	5021756	5246922	1.71605	B103-S3
3	5247012	8955537	2.351	B103-S3
3	57232251	75518196	1.97288	B103-S3
3	75832447	78646679	2.59763	B103-S3
3	78649353	108541926	2.19388	B103-S3
3	8990227	18055162	1.77912	B103-S3
4	113507527	114028289	1.56302	B103-S3
4	114034921	115767205	2.35494	B103-S3
4	115769296	117520537	3.00487	B103-S3
4	117520571	125357713	2.11856	B103-S3
4	125383969	126412966	2.54406	B103-S3
4	126413006	128734383	2.09016	B103-S3
4	128736890	129192637	1.56302	B103-S3
4	129776947	129964989	1.94461	B103-S3
4	129965089	139544900	2.43793	B103-S3
4	139545457	140640432	1.728	B103-S3
4	140640532	148465629	2.20004	B103-S3
4	148465721	152487314	1.82276	B103-S3
4	152487414	153410694	2.26303	B103-S3
4	153455985	154669805	1.87906	B103-S3
4	154669905	159567620	2.40855	B103-S3
4	159567670	160262944	1.7924	B103-S3
4	160263044	165722246	2.22699	B103-S3
4	165722346	166231660	1.18887	B103-S3
4	166231760	183594284	2.16977	B103-S3
4	183594384	184932916	1.71524	B103-S3
4	184938348	185552995	2.2012	B103-S3
4	185553095	188140909	1.87189	B103-S3
4	188891609	189068564	1.20581	B103-S3
4	189192062	191040528	1.78329	B103-S3
4	23054	9241048	1.69723	B103-S3
4	25265420	26491085	1.71868	B103-S3
4	26491802	37445271	2.31088	B103-S3
4	37445326	39825442	1.6833	B103-S3
4	39825487	40123696	1.25379	B103-S3
4	40245724	41266309	1.58493	B103-S3
4	41269981	41937568	2.27794	B103-S3
4	41937668	42545999	1.80292	B103-S3
4	42546099	42643905	2.1458	B103-S3
4	42643996	47514798	2.5275	B103-S3
4	47517358	48833654	2.0913	B103-S3
4	48834587	49554596	1.54299	B103-S3
4	52777163	54968083	1.93438	B103-S3
4	54969625	55153514	1.43768	B103-S3
4	55153614	55968433	1.91403	B103-S3
4	55968533	56138476	2.61213	B103-S3
4	56225604	57357736	1.84553	B103-S3
4	57357836	57898611	1.43147	B103-S3
4	57898711	66509224	2.52244	B103-S3
4	66509324	68370843	1.76372	B103-S3
4	68370943	68489055	2.60105	B103-S3
4	68489734	69578276	2.06744	B103-S3
4	69650372	71384677	2.39981	B103-S3
4	71384712	71892624	1.60896	B103-S3
4	71895001	76501849	2.28132	B103-S3
4	76501949	77026901	1.62047	B103-S3
4	77028772	83051434	2.09108	B103-S3
4	83051534	84519695	1.63457	B103-S3
4	84519795	85762528	2.07061	B103-S3
4	85765612	87643632	2.53525	B103-S3
4	87653507	113506888	2.09568	B103-S3
4	9241148	9431219	0.871855	B103-S3
4	9431319	9741417	1.57741	B103-S3
4	9741446	25265320	2.13215	B103-S3
5	10236525	10625076	1.8153	B103-S3
5	10638167	13769156	2.44221	B103-S3
5	111780550	112363298	1.79406	B103-S3
5	112364641	115346682	2.37669	B103-S3
5	115348039	115553851	1.8966	B103-S3
5	115598482	116052382	2.56436	B103-S3
5	116052482	118814802	1.85039	B103-S3
5	118824905	122012019	2.49381	B103-S3
5	122012119	122359771	2.02806	B103-S3
5	122361463	122930895	2.65624	B103-S3
5	122940316	125807849	2.20639	B103-S3
5	125807949	126172268	1.56627	B103-S3
5	126187186	130067695	2.3478	B103-S3
5	130325947	132212984	1.89146	B103-S3
5	132213107	132535153	1.49122	B103-S3
5	132535253	132763483	2.68817	B103-S3
5	133316714	133909605	1.63222	B103-S3
5	133912448	134056932	1.21533	B103-S3
5	134059226	134367285	1.74449	B103-S3
5	134670388	136983326	2.20828	B103-S3
5	136983426	138208636	1.55026	B103-S3
5	13769256	16673021	1.99287	B103-S3
5	138208736	138386730	2.01244	B103-S3
5	138386782	141973607	1.85599	B103-S3
5	141974818	145442291	2.30504	B103-S3
5	145442316	145969001	1.7207	B103-S3
5	145969101	148441834	2.37693	B103-S3
5	148441934	151771742	1.8951	B103-S3
5	151771842	153429556	2.39931	B103-S3
5	153432428	154194666	1.79904	B103-S3
5	154194766	154299532	1.38342	B103-S3
5	154299632	157358539	1.82786	B103-S3
5	158143617	158712049	2.24795	B103-S3
5	158712148	160097685	1.89333	B103-S3
5	160111904	161524949	2.68144	B103-S3
5	161528168	167576488	2.25034	B103-S3
5	16673786	17276841	1.38812	B103-S3
5	167576588	168149209	1.6891	B103-S3
5	168149309	169446051	2.02002	B103-S3
5	169446151	169931648	2.38314	B103-S3
5	169931748	173371976	1.72371	B103-S3
5	17276941	18049922	1.79572	B103-S3
5	173372076	174156128	2.04713	B103-S3
5	174156228	180754137	1.59053	B103-S3
5	18049998	31485222	2.24246	B103-S3
5	1879904	10235431	2.33469	B103-S3
5	31486585	32711869	1.65349	B103-S3
5	32711969	34033659	2.18662	B103-S3
5	34182642	35013303	1.78681	B103-S3
5	35014034	36996774	2.20026	B103-S3
5	37000436	37209582	1.80092	B103-S3
5	37209682	37516811	1.4211	B103-S3
5	37605305	40681109	2.10364	B103-S3
5	40681209	40955453	1.57838	B103-S3
5	40955553	43039989	2.21395	B103-S3
5	42767	1879804	1.71625	B103-S3
5	43040089	43547888	1.65705	B103-S3
5	43547988	52779465	2.31745	B103-S3
5	52779565	56777129	1.82744	B103-S3
5	56777229	59754934	2.36604	B103-S3
5	59755302	62072560	1.7606	B103-S3
5	62072660	64511239	2.28422	B103-S3
5	64511339	65029616	1.86934	B103-S3
5	65053494	65108361	1.40282	B103-S3
5	65118600	65475568	2.00733	B103-S3
5	65475668	68364776	2.38016	B103-S3
5	68364876	70671536	1.37647	B103-S3
5	70671636	71492499	1.84976	B103-S3
5	71492565	72157820	2.4108	B103-S3
5	72157919	76587403	1.90793	B103-S3
5	76640616	78181576	2.24055	B103-S3
5	78260458	78825710	1.615	B103-S3
5	78825801	79473057	1.94395	B103-S3
5	79473157	79733431	1.3266	B103-S3
5	79733531	80932417	1.87224	B103-S3
5	80932517	111755616	2.27867	B103-S3
6	100369024	104474128	2.49586	B103-S3
6	10419600	11104377	1.56187	B103-S3
6	104474636	107387182	1.84807	B103-S3
6	107387638	107595353	1.20948	B103-S3
6	107595453	111806138	1.83479	B103-S3
6	11104477	13381749	2.12431	B103-S3
6	111824481	133318784	2.21623	B103-S3
6	133318884	133827336	2.72063	B103-S3
6	13381849	17283210	1.80237	B103-S3
6	133827436	135540225	1.85865	B103-S3
6	135540325	136560967	2.26736	B103-S3
6	136562575	144904922	1.99005	B103-S3
6	144981325	146920295	2.47288	B103-S3
6	145688	5765162	1.8682	B103-S3
6	146920360	147049745	1.95902	B103-S3
6	147049845	147728617	2.41506	B103-S3
6	147728668	151757720	1.66116	B103-S3
6	151766439	155600586	1.98041	B103-S3
6	155606268	157256797	2.41531	B103-S3
6	157454176	157530391	2.09153	B103-S3
6	157530491	159342895	1.63909	B103-S3
6	159343179	160961286	2.00155	B103-S3
6	160961386	161134301	1.59595	B103-S3
6	161134733	162208466	2.03478	B103-S3
6	162372616	165792905	1.03391	B103-S3
6	166074177	171049067	2.06994	B103-S3
6	17283261	17608641	1.41983	B103-S3
6	17611568	22147108	1.7804	B103-S3
6	22147263	24146183	2.48793	B103-S3
6	24146357	25488572	1.72938	B103-S3
6	25488672	26017810	2.31965	B103-S3
6	26017910	28094622	1.87245	B103-S3
6	28094722	28329119	2.29316	B103-S3
6	28329219	31138011	1.77144	B103-S3
6	31138111	31477757	2.10685	B103-S3
6	31477803	32336722	1.62944	B103-S3
6	32337626	33054139	2.09199	B103-S3
6	33054239	33368438	1.67532	B103-S3
6	33371100	35442821	1.60887	B103-S3
6	35442921	35543837	1.22472	B103-S3
6	35544743	39268388	1.7704	B103-S3
6	39290193	41470387	2.17982	B103-S3
6	41470533	44796770	1.59866	B103-S3
6	44797370	52051319	2.27457	B103-S3
6	52051405	53764456	1.8648	B103-S3
6	53764556	65301749	2.25786	B103-S3
6	5771551	6321079	2.55862	B103-S3
6	6321179	7518488	1.55881	B103-S3
6	65301849	70098989	2.74653	B103-S3
6	70099089	71011856	2.32795	B103-S3
6	71012512	71570111	1.8506	B103-S3
6	71570211	73108157	2.46576	B103-S3
6	73111369	73904778	2.05908	B103-S3
6	73904878	74150065	1.54508	B103-S3
6	74155260	74328127	1.16499	B103-S3
6	74328227	74476559	1.67652	B103-S3
6	74476655	76124696	2.22248	B103-S3
6	7518536	10415741	1.96209	B103-S3
6	76156290	76604985	1.78702	B103-S3
6	76605085	82462456	2.28398	B103-S3
6	82882109	83080516	1.85251	B103-S3
6	83602700	83832876	2.48946	B103-S3
6	83834340	90642035	1.86026	B103-S3
6	90642135	99365638	2.3886	B103-S3
6	99374287	100368924	1.89532	B103-S3
7	102194861	110526889	2.93552	B103-S3
7	110568162	111032946	4.1524	B103-S3
7	111366236	141765357	3.02086	B103-S3
7	141765457	141794466	4.57598	B103-S3
7	141794566	147675006	3.20344	B103-S3
7	147675106	148920962	2.40955	B103-S3
7	148922109	159026181	2.78307	B103-S3
7	19761	6976471	2.33891	B103-S3
7	23561701	23768741	2.19226	B103-S3
7	23768841	32336747	3.11677	B103-S3
7	32336844	32609722	2.32331	B103-S3
7	32609822	43688099	3.12172	B103-S3
7	43688199	44000047	2.42233	B103-S3
7	44001505	54827072	2.95851	B103-S3
7	55001138	55268328	17.5561	B103-S3
7	55270117	55279353	18.5022	B103-S3
7	55326716	56231263	2.41331	B103-S3
7	56231294	56635750	1.71262	B103-S3
7	56636210	57669998	2.69277	B103-S3
7	57887819	63370563	1.96581	B103-S3
7	63370769	64559273	2.76709	B103-S3
7	64560521	68105953	2.1887	B103-S3
7	69064892	70255575	3.01596	B103-S3
7	6977335	23561573	3.35558	B103-S3
7	70255662	76641266	2.15164	B103-S3
7	76647325	77830697	2.67794	B103-S3
7	77885272	91504156	3.52617	B103-S3
7	91509278	92195417	2.74207	B103-S3
7	92195497	97361955	3.57639	B103-S3
7	97500940	102115013	2.34495	B103-S3
8	101642683	101908398	1.41403	B103-S3
8	101931069	103357836	2.03366	B103-S3
8	103358426	104061267	1.48507	B103-S3
8	104063273	113562808	2.28137	B103-S3
8	113562908	117149281	2.72199	B103-S3
8	116684	7320405	1.96406	B103-S3
8	117657211	120795698	2.03926	B103-S3
8	120795798	121160259	1.40156	B103-S3
8	121170357	124027748	2.05253	B103-S3
8	124031442	124515806	1.53786	B103-S3
8	124516760	131226992	1.9186	B103-S3
8	131249152	134421249	2.29147	B103-S3
8	13133871	17043971	2.35543	B103-S3
8	134421349	146279524	1.76064	B103-S3
8	17045672	21823357	1.95749	B103-S3
8	21823765	23712469	1.63567	B103-S3
8	23748152	24773299	2.37173	B103-S3
8	24774495	33084374	1.82744	B103-S3
8	33084474	33717399	1.44189	B103-S3
8	33717499	37612294	1.96581	B103-S3
8	37614008	38995558	1.57838	B103-S3
8	38995658	39775671	2.24317	B103-S3
8	39775744	42019945	1.83374	B103-S3
8	42020045	43047531	1.47264	B103-S3
8	43047631	48749073	1.90402	B103-S3
8	48749173	49503277	1.50131	B103-S3
8	49504001	52387759	2.3896	B103-S3
8	52396160	54656217	2.02024	B103-S3
8	54669098	55592190	1.6436	B103-S3
8	55592290	56270470	2.37446	B103-S3
8	56273203	57125551	1.69191	B103-S3
8	57127127	66517744	2.18592	B103-S3
8	66517844	66636994	1.45473	B103-S3
8	66637094	67406075	2.16767	B103-S3
8	67408671	68695322	1.673	B103-S3
8	68942678	69069866	2.46145	B103-S3
8	69552539	71646294	1.83521	B103-S3
8	71646394	73951414	2.43994	B103-S3
8	7320505	7878444	1.33976	B103-S3
8	73951488	74922539	1.69853	B103-S3
8	74939009	80577262	2.41131	B103-S3
8	8042115	13115422	1.88789	B103-S3
8	80677487	95399515	2.09816	B103-S3
8	95403835	95993304	1.55327	B103-S3
8	96042897	97605337	2.00266	B103-S3
8	97605416	98155291	2.67284	B103-S3
8	98725784	99142469	1.44665	B103-S3
8	99142562	101642589	1.90176	B103-S3
9	109625575	109879437	2.71303	B103-S3
9	109879537	116822554	1.77342	B103-S3
9	116823669	121929311	2.12293	B103-S3
9	122122294	141109984	1.65393	B103-S3
9	12769	6241813	2.00936	B103-S3
9	19200909	19378419	1.59363	B103-S3
9	19380189	21015977	2.22604	B103-S3
9	21016074	21865946	1.14557	B103-S3
9	22748042	23766900	1.29096	B103-S3
9	26841460	26910517	2.03612	B103-S3
9	26978106	28889021	1.09573	B103-S3
9	29824782	32407322	2.61107	B103-S3
9	32407389	70732751	1.7222	B103-S3
9	6251214	6688737	1.66975	B103-S3
9	6834863	18952584	2.23011	B103-S3
9	70734226	70918880	1.29044	B103-S3
9	70918980	90589440	1.93383	B103-S3
9	90631266	91041649	1.21115	B103-S3
9	91063827	109625475	1.90325	B103-S3
X	100871144	114524481	2.15413	B103-S3
X	114536548	114879433	1.61929	B103-S3
X	115303721	117031973	2.28422	B103-S3
X	117032292	118219569	1.72293	B103-S3
X	118374281	119209962	1.34875	B103-S3
X	119211095	120466601	1.75081	B103-S3
X	121605430	122648684	2.26399	B103-S3
X	122648784	123487242	1.58532	B103-S3
X	123499570	128580890	2.37124	B103-S3
X	128580924	129042119	1.84891	B103-S3
X	129042618	129518976	1.49906	B103-S3
X	129519076	129762117	1.86352	B103-S3
X	129765461	131573728	2.34338	B103-S3
X	131659099	134294573	1.70395	B103-S3
X	134303565	134715146	2.26016	B103-S3
X	134715201	135441480	1.64638	B103-S3
X	135441580	135861708	2.15695	B103-S3
X	135862811	137713749	1.5248	B103-S3
X	137713849	138808899	2.44499	B103-S3
X	138809386	147733262	2.03702	B103-S3
X	147733362	148436467	2.66721	B103-S3
X	148564398	152614328	2.03702	B103-S3
X	152614428	154227933	1.63143	B103-S3
X	154250805	154448680	2.51203	B103-S3
X	154455457	155171534	1.79983	B103-S3
X	155171634	155257139	2.2664	B103-S3
X	15706835	17092361	1.62262	B103-S3
X	17095384	18195680	2.18577	B103-S3
X	18195780	20195302	1.66047	B103-S3
X	20204466	21761986	2.52182	B103-S3
X	215692	2947338	1.18213	B103-S3
X	21772335	23851723	1.95159	B103-S3
X	23855052	24813774	1.54531	B103-S3
X	24828051	34962278	2.14487	B103-S3
X	2951102	7252082	1.65848	B103-S3
X	35821481	38080707	2.48589	B103-S3
X	38080775	39520480	1.96779	B103-S3
X	39646915	41554949	1.4929	B103-S3
X	41586812	44101597	2.07878	B103-S3
X	44101653	49646502	1.52227	B103-S3
X	49646603	50121258	2.00888	B103-S3
X	50121640	50213513	2.70599	B103-S3
X	50213613	51665349	2.04961	B103-S3
X	51935071	54698901	1.52594	B103-S3
X	54776335	63410458	1.97856	B103-S3
X	63411039	65242232	1.64796	B103-S3
X	65242622	67494739	2.22035	B103-S3
X	67494766	70320714	1.6897	B103-S3
X	70321639	70887924	1.33413	B103-S3
X	70888882	77369297	1.72212	B103-S3
X	7267964	15682966	2.11121	B103-S3
X	77369397	99905905	2.21167	B103-S3
X	99917281	100852751	1.54413	B103-S3
Y	2712075	2848069	1.3711	B103-S3
Y	28703168	59001458	1.02264	B103-S3
Y	3447282	9154922	1.99557	B103-S3
Y	9156503	9386632	1.28476	B103-S3
Y	9386732	28689311	1.79946	B103-S3
1	100797466	108766534	2.34003	B103-S4
1	108784015	151196875	1.83795	B103-S4
1	13090	267437	3.30385	B103-S4
1	151204739	162560344	1.72403	B103-S4
1	162569070	179019669	2.00109	B103-S4
1	179033095	183774389	1.83239	B103-S4
1	183775686	202154846	2.04914	B103-S4
1	202156147	249231502	1.83297	B103-S4
1	55331002	62444975	2.05508	B103-S4
[truncated: 9,825 more rows]
