# Supplementary material for: Biological and therapeutic implications of multisector sequencing in newly diagnosed glioblastoma
Source: Oxford University Press journal article supplement (doi:10.1093/neuonc/nox232), 2017-12-13
Supplement: nox232_suppl_supplementary_table_s4.xlsx [file nox232_suppl_supplementary_table_s4.xlsx]

## Sheet: Sheet1
Table S4: List of Recurrently Mutated Cancer-Related Genes
SYMBOL	BIOTYPE	CHR	BAND	ENSEMBL	ENTREZ	DESCRIPTION	SOURCE
ABI1	protein_coding	10	10p11.2	ENSG00000136754	10006	abl-interactor 1	COSMIC
ABL1	protein_coding	9	9q34.1	ENSG00000097007	25	c-abl oncogene 1, non-receptor tyrosine kinase	COSMIC
ABL2	protein_coding	1	1q25.2	ENSG00000143322	27	c-abl oncogene 2, non-receptor tyrosine kinase	COSMIC
ACKR3	protein_coding	2	2q37.3	ENSG00000144476	57007	atypical chemokine receptor 3	COSMIC
ACO1	protein_coding	9	9p21.1	ENSG00000122729	48	aconitase 1, soluble	Lawrence
ACSL3	protein_coding	2	2q34-q35	ENSG00000123983	2181	acyl-CoA synthetase long-chain family member 3	COSMIC
ACSL6	protein_coding	5	5q31.1	ENSG00000164398	23305	acyl-CoA synthetase long-chain family member 6	COSMIC
ACVR1B	protein_coding	12	12q13	ENSG00000135503	91	activin A receptor, type IB	PanCancer,Lawrence
ACVR2A	protein_coding	2	2q22.3	ENSG00000121989	92	activin A receptor, type IIA	PanCancer
ACVR2B	protein_coding	3	3p22	ENSG00000114739	93	activin A receptor, type IIB	Lawrence
ADNP	protein_coding	20	20q13.13	ENSG00000101126	23394	activity-dependent neuroprotector homeobox	Lawrence
AFF1	protein_coding	4	4q21	ENSG00000172493	4299	AF4/FMR2 family, member 1	COSMIC
AFF3	protein_coding	2	2q11.2-q12	ENSG00000144218	3899	AF4/FMR2 family, member 3	COSMIC
AFF4	protein_coding	5	5q31	ENSG00000072364	27125	AF4/FMR2 family, member 4	COSMIC
AJUBA	protein_coding	14	14q11.2	ENSG00000129474	84962	ajuba LIM protein	PanCancer,Lawrence
AKAP9	protein_coding	7	7q21-q22	ENSG00000127914	10142	A kinase (PRKA) anchor protein 9	COSMIC
AKT1	protein_coding	14	14q32.32	ENSG00000142208	207	v-akt murine thymoma viral oncogene homolog 1	PanCancer,Lawrence,COSMIC
AKT2	protein_coding	19	19q13.1-q13.2	ENSG00000105221	208	v-akt murine thymoma viral oncogene homolog 2	COSMIC
ALDH2	protein_coding	12	12q24.2	ENSG00000111275	217	aldehyde dehydrogenase 2 family (mitochondrial)	COSMIC
ALK	protein_coding	2	2p23	ENSG00000171094	238	anaplastic lymphoma receptor tyrosine kinase	Lawrence,COSMIC
ALKBH6	protein_coding	19	19q13.12	ENSG00000239382	84964	alkB, alkylation repair homolog 6 (E. coli)	Lawrence
ALPK2	protein_coding	18	18q21.31	ENSG00000198796	115701	alpha-kinase 2	Lawrence
AMER1	protein_coding	X	Xq11.2	ENSG00000184675	139285	APC membrane recruitment protein 1	COSMIC
ANK3	protein_coding	10	10q21	ENSG00000151150	288	ankyrin 3, node of Ranvier (ankyrin G)	Lawrence
APC	protein_coding	5	5q21-q22	ENSG00000134982	324	adenomatous polyposis coli	PanCancer,Lawrence,COSMIC
APOL2	protein_coding	22	22q12	ENSG00000128335	23780	apolipoprotein L, 2	Lawrence
AR	protein_coding	X	Xq12	ENSG00000169083	367	androgen receptor	PanCancer
ARHGAP26	protein_coding	5	5q31	ENSG00000145819	23092	Rho GTPase activating protein 26	COSMIC
ARHGAP35	protein_coding	19	19q13.3	ENSG00000160007	2909	Rho GTPase activating protein 35	PanCancer,Lawrence
ARHGEF12	protein_coding	11	11q23.3	ENSG00000196914	23365	Rho guanine nucleotide exchange factor (GEF) 12	COSMIC
ARID1A	protein_coding	1	1p35.3	ENSG00000117713	8289	AT rich interactive domain 1A (SWI-like)	PanCancer,Lawrence,COSMIC
ARID2	protein_coding	12	12q12	ENSG00000189079	196528	AT rich interactive domain 2 (ARID, RFX-like)	Lawrence,COSMIC
ARID5B	protein_coding	10	10q21.2	ENSG00000150347	84159	AT rich interactive domain 5B (MRF1-like)	PanCancer,Lawrence
ARNT	protein_coding	1	1q21	ENSG00000143437	405	aryl hydrocarbon receptor nuclear translocator	COSMIC
ASPSCR1	protein_coding	17	17q25.3	ENSG00000169696	79058	alveolar soft part sarcoma chromosome region, candidate 1	COSMIC
ASXL1	protein_coding	20	20q11	ENSG00000171456	171023	additional sex combs like 1 (Drosophila)	PanCancer,Lawrence,COSMIC
ASXL2	protein_coding	2	2p24.1	ENSG00000143970	55252	additional sex combs like 2 (Drosophila)	Lawrence
ATF1	protein_coding	12	12q13	ENSG00000123268	466	activating transcription factor 1	COSMIC
ATIC	protein_coding	2	2q35	ENSG00000138363	471	5-aminoimidazole-4-carboxamide ribonucleotide formyltransferase/IMP cyclohydrolase	COSMIC
ATM	protein_coding	11	11q22-q23	ENSG00000149311	472	ataxia telangiectasia mutated	PanCancer,Lawrence,COSMIC
ATP5B	protein_coding	12	12q13.13	ENSG00000110955	506	ATP synthase, H+ transporting, mitochondrial F1 complex, beta polypeptide	Lawrence
ATR	protein_coding	3	3q23	ENSG00000175054	545	ataxia telangiectasia and Rad3 related	PanCancer
ATRX	protein_coding	X	Xq21.1	ENSG00000085224	546	alpha thalassemia/mental retardation syndrome X-linked	PanCancer,COSMIC
AXIN1	protein_coding	16	16p13.3	ENSG00000103126	8312	axin 1	COSMIC
AXIN2	protein_coding	17	17q23-q24	ENSG00000168646	8313	axin 2	PanCancer,Lawrence
AZGP1	protein_coding	7	7q22.1	ENSG00000160862	563	alpha-2-glycoprotein 1, zinc-binding	Lawrence
B2M	protein_coding	15	15q21-q22.2	ENSG00000166710	567	beta-2-microglobulin	Lawrence
B4GALT3	protein_coding	1	1q21-q23	ENSG00000158850	8703	UDP-Gal:betaGlcNAc beta 1,4- galactosyltransferase, polypeptide 3	PanCancer
BAP1	protein_coding	3	3p21.31-p21.2	ENSG00000163930	8314	BRCA1 associated protein-1 (ubiquitin carboxy-terminal hydrolase)	PanCancer,Lawrence,COSMIC
BCL10	protein_coding	1	1p22	ENSG00000142867	8915	B-cell CLL/lymphoma 10	COSMIC
BCL11A	protein_coding	2	2p16.1	ENSG00000119866	53335	B-cell CLL/lymphoma 11A (zinc finger protein)	COSMIC
BCL11B	protein_coding	14	14q32.2	ENSG00000127152	64919	B-cell CLL/lymphoma 11B (zinc finger protein)	COSMIC
BCL2	protein_coding	18	18q21.3	ENSG00000171791	596	B-cell CLL/lymphoma 2	COSMIC
BCL3	protein_coding	19	19q13.1-q13.2	ENSG00000069399	602	B-cell CLL/lymphoma 3	COSMIC
BCL6	protein_coding	3	3q27	ENSG00000113916	604	B-cell CLL/lymphoma 6	COSMIC
SYMBOL	BIOTYPE	CHR	BAND	ENSEMBL	ENTREZ	DESCRIPTION	SOURCE
BCL7A	protein_coding	12	12q24.13	ENSG00000110987	605	B-cell CLL/lymphoma 7A	COSMIC
BCL9	protein_coding	1	1q21	ENSG00000116128	607	B-cell CLL/lymphoma 9	COSMIC
BCLAF1	protein_coding	6	6q22-q23	ENSG00000029363	9774	BCL2-associated transcription factor 1	Lawrence
BCOR	protein_coding	X	Xp11.4	ENSG00000183337	54880	BCL6 corepressor	Lawrence,COSMIC
BCR	protein_coding	22	22q11.23	ENSG00000186716	613	breakpoint cluster region	COSMIC
BHMT2	protein_coding	5	5q13	ENSG00000132840	23743	betaine--homocysteine S-methyltransferase 2	Lawrence
BIRC3	protein_coding	11	11q22	ENSG00000023445	330	baculoviral IAP repeat containing 3	COSMIC
BLM	protein_coding	15	15q26.1	ENSG00000197299	641	Bloom syndrome, RecQ helicase-like	COSMIC
BMPR1A	protein_coding	10	10q22.3	ENSG00000107779	657	bone morphogenetic protein receptor, type IA	COSMIC
BRAF	protein_coding	7	7q34	ENSG00000157764	673	v-raf murine sarcoma viral oncogene homolog B	PanCancer,Lawrence,COSMIC
BRCA1	protein_coding	17	17q21	ENSG00000012048	672	breast cancer 1, early onset	PanCancer,Lawrence,COSMIC
BRCA2	protein_coding	13	13q12.3	ENSG00000139618	675	breast cancer 2, early onset	PanCancer,COSMIC
BRD3	protein_coding	9	9q34	ENSG00000169925	8019	bromodomain containing 3	COSMIC
BRD4	protein_coding	19	19p13.1	ENSG00000141867	23476	bromodomain containing 4	COSMIC
BRE	protein_coding	2	2p23.2	ENSG00000158019	9577	brain and reproductive organ-expressed (TNFRSF1A modulator)	Lawrence
BRIP1	protein_coding	17	17q22.2	ENSG00000136492	83990	BRCA1 interacting protein C-terminal helicase 1	COSMIC
BTG1	protein_coding	12	12q22	ENSG00000133639	694	B-cell translocation gene 1, anti-proliferative	COSMIC
BUB1B	protein_coding	15	15q15	ENSG00000156970	701	BUB1 mitotic checkpoint serine/threonine kinase B	COSMIC
C15orf65	protein_coding	15	15q21.3	ENSG00000261652	145788	chromosome 15 open reading frame 65	COSMIC
C2orf44	protein_coding	2	2p23.3	ENSG00000163026	80304	chromosome 2 open reading frame 44	COSMIC
C3orf70	protein_coding	3	3q27.2	ENSG00000187068	285382	chromosome 3 open reading frame 70	Lawrence
CAMTA1	protein_coding	1	1p36.31-p36.23	ENSG00000171735	23261	calmodulin binding transcription activator 1	COSMIC
CANT1	protein_coding	17	17q25.3	ENSG00000171302	124583	calcium activated nucleotidase 1	COSMIC
CAP2	protein_coding	6	6p22.3	ENSG00000112186	10486	CAP, adenylate cyclase-associated protein, 2 (yeast)	Lawrence
CARD11	protein_coding	7	7p22	ENSG00000198286	84433	caspase recruitment domain family, member 11	Lawrence,COSMIC
CARS	protein_coding	11	11p15.5	ENSG00000110619	833	cysteinyl-tRNA synthetase	COSMIC
CASC5	protein_coding	15	15q14	ENSG00000137812	57082	cancer susceptibility candidate 5	COSMIC
CASP8	protein_coding	2	2q33-q34	ENSG00000064012	841	caspase 8, apoptosis-related cysteine peptidase	Lawrence
CBFA2T3	protein_coding	16	16q24	ENSG00000129993	863	core-binding factor, runt domain, alpha subunit 2; translocated to, 3	COSMIC
CBFB	protein_coding	16	16q22.1	ENSG00000067955	865	core-binding factor, beta subunit	PanCancer,Lawrence,COSMIC
CBL	protein_coding	11	11q23.3	ENSG00000110395	867	Cbl proto-oncogene, E3 ubiquitin protein ligase	COSMIC
CBLB	protein_coding	3	3q13.11	ENSG00000114423	868	Cbl proto-oncogene B, E3 ubiquitin protein ligase	COSMIC
CBLC	protein_coding	19	19q13.2	ENSG00000142273	23624	Cbl proto-oncogene C, E3 ubiquitin protein ligase	COSMIC
CCDC120	protein_coding	X	Xp11.23	ENSG00000147144	90060	coiled-coil domain containing 120	Lawrence
CCDC6	protein_coding	10	10q21	ENSG00000108091	8030	coiled-coil domain containing 6	Lawrence,COSMIC
CCNB1IP1	protein_coding	14	14q11.2	ENSG00000100814	57820	cyclin B1 interacting protein 1, E3 ubiquitin protein ligase	COSMIC
CCND1	protein_coding	11	11q13	ENSG00000110092	595	cyclin D1	PanCancer,Lawrence,COSMIC
CCND2	protein_coding	12	12p13	ENSG00000118971	894	cyclin D2	COSMIC
CCND3	protein_coding	6	6p21	ENSG00000112576	896	cyclin D3	COSMIC
CCNE1	protein_coding	19	19q12	ENSG00000105173	898	cyclin E1	COSMIC
CD1D	protein_coding	1	1q22-q23	ENSG00000158473	912	CD1d molecule	Lawrence
CD274	protein_coding	9	9p24	ENSG00000120217	29126	CD274 molecule	COSMIC
CD70	protein_coding	19	19p13	ENSG00000125726	970	CD70 molecule	Lawrence
CD74	protein_coding	5	5q32	ENSG00000019582	972	CD74 molecule, major histocompatibility complex, class II invariant chain	COSMIC
CD79A	protein_coding	19	19q13.2	ENSG00000105369	973	CD79a molecule, immunoglobulin-associated alpha	COSMIC
CD79B	protein_coding	17	17q23	ENSG00000007312	974	CD79b molecule, immunoglobulin-associated beta	Lawrence,COSMIC
CDC27	protein_coding	17	17q21.32	ENSG00000004897	996	cell division cycle 27	Lawrence
CDC73	protein_coding	1	1q25	ENSG00000134371	79577	cell division cycle 73	COSMIC
CDH1	protein_coding	16	16q22.1	ENSG00000039068	999	cadherin 1, type 1, E-cadherin (epithelial)	PanCancer,Lawrence,COSMIC
CDH11	protein_coding	16	16q21	ENSG00000140937	1009	cadherin 11, type 2, OB-cadherin (osteoblast)	COSMIC
CDK12	protein_coding	17	17q12	ENSG00000167258	51755	cyclin-dependent kinase 12	PanCancer,Lawrence,COSMIC
CDK4	protein_coding	12	12q14	ENSG00000135446	1019	cyclin-dependent kinase 4	Lawrence,COSMIC
CDK6	protein_coding	7	7q21-q22	ENSG00000105810	1021	cyclin-dependent kinase 6	COSMIC
CDKN1A	protein_coding	6	6p21.2	ENSG00000124762	1026	cyclin-dependent kinase inhibitor 1A (p21, Cip1)	PanCancer,Lawrence
CDKN1B	protein_coding	12	12p13.1-p12	ENSG00000111276	1027	cyclin-dependent kinase inhibitor 1B (p27, Kip1)	PanCancer,Lawrence
SYMBOL	BIOTYPE	CHR	BAND	ENSEMBL	ENTREZ	DESCRIPTION	SOURCE
CDKN2A	protein_coding	9	9p21	ENSG00000147889	1029	cyclin-dependent kinase inhibitor 2A	PanCancer,Lawrence,COSMIC
CDKN2C	protein_coding	1	1p32	ENSG00000123080	1031	cyclin-dependent kinase inhibitor 2C (p18, inhibits CDK4)	PanCancer,COSMIC
CDX2	protein_coding	13	13q12.3	ENSG00000165556	1045	caudal type homeobox 2	COSMIC
CEBPA	protein_coding	19	19q13.1	ENSG00000245848	1050	CCAAT/enhancer binding protein (C/EBP), alpha	PanCancer,Lawrence,COSMIC
CEP76	protein_coding	18	18p11.21	ENSG00000101624	79959	centrosomal protein 76kDa	Lawrence
CHCHD7	protein_coding	8	8q12.1	ENSG00000170791	79145	coiled-coil-helix-coiled-coil-helix domain containing 7	COSMIC
CHD4	protein_coding	12	12p13	ENSG00000111642	1108	chromodomain helicase DNA binding protein 4	Lawrence
CHD8	protein_coding	14	14q11.2	ENSG00000100888	57680	chromodomain helicase DNA binding protein 8	Lawrence
CHEK2	protein_coding	22	22q12.1	ENSG00000183765	11200	checkpoint kinase 2	PanCancer,COSMIC
CHIC2	protein_coding	4	4q11	ENSG00000109220	26511	cysteine-rich hydrophobic domain 2	COSMIC
CHN1	protein_coding	2	2q31.1	ENSG00000128656	1123	chimerin 1	COSMIC
CIC	protein_coding	19	19q13.2	ENSG00000079432	23152	capicua transcriptional repressor	COSMIC
CIITA	protein_coding	16	16p13	ENSG00000179583	4261	class II, major histocompatibility complex, transactivator	COSMIC
CLP1	protein_coding	11	11q12	ENSG00000172409	10978	cleavage and polyadenylation factor I subunit 1	COSMIC
CLTC	protein_coding	17	17q23.1	ENSG00000141367	1213	clathrin, heavy chain (Hc)	COSMIC
CLTCL1	protein_coding	22	22q11.21	ENSG00000070371	8218	clathrin, heavy chain-like 1	COSMIC
CNBD1	protein_coding	8	8q21.3	ENSG00000176571	168975	cyclic nucleotide binding domain containing 1	Lawrence
CNBP	protein_coding	3	3q21	ENSG00000169714	7555	CCHC-type zinc finger, nucleic acid binding protein	COSMIC
CNKSR1	protein_coding	1	1p36.11	ENSG00000142675	10256	connector enhancer of kinase suppressor of Ras 1	Lawrence
CNOT3	protein_coding	19	19q13.4	ENSG00000088038	4849	CCR4-NOT transcription complex, subunit 3	COSMIC
CNTRL	protein_coding	9	9q33.2	ENSG00000119397	11064	centriolin	COSMIC
COL1A1	protein_coding	17	17q21.33	ENSG00000108821	1277	collagen, type I, alpha 1	COSMIC
COL5A1	protein_coding	9	9q34.2-q34.3	ENSG00000130635	1289	collagen, type V, alpha 1	Lawrence
COL5A3	protein_coding	19	19p13.2	ENSG00000080573	50509	collagen, type V, alpha 3	Lawrence
COX6C	protein_coding	8	8q22.2	ENSG00000164919	1345	cytochrome c oxidase subunit VIc	COSMIC
CREB1	protein_coding	2	2q34	ENSG00000118260	1385	cAMP responsive element binding protein 1	COSMIC
CREB3L1	protein_coding	11	11p11.2	ENSG00000157613	90993	cAMP responsive element binding protein 3-like 1	COSMIC
CREB3L2	protein_coding	7	7q34	ENSG00000182158	64764	cAMP responsive element binding protein 3-like 2	COSMIC
CREBBP	protein_coding	16	16p13.3	ENSG00000005339	1387	CREB binding protein	Lawrence,COSMIC
CRIPAK	protein_coding	4	4p16.3	ENSG00000179979	285464	cysteine-rich PAK1 inhibitor	PanCancer
CRLF2	protein_coding	X	Xp22.3; Yp11.3	ENSG00000205755	64109	cytokine receptor-like factor 2	COSMIC
CRTC1	protein_coding	19	19p13.11	ENSG00000105662	23373	CREB regulated transcription coactivator 1	COSMIC
CRTC3	protein_coding	15	15q26.1	ENSG00000140577	64784	CREB regulated transcription coactivator 3	COSMIC
CSF3R	protein_coding	1	1p35-p34.3	ENSG00000119535	1441	colony stimulating factor 3 receptor (granulocyte)	COSMIC
CTCF	protein_coding	16	16q21-q22.3	ENSG00000102974	10664	CCCTC-binding factor (zinc finger protein)	PanCancer,Lawrence
CTNNB1	protein_coding	3	3p21	ENSG00000168036	1499	catenin (cadherin-associated protein), beta 1, 88kDa	PanCancer,Lawrence,COSMIC
CUL4B	protein_coding	X	Xq23	ENSG00000158290	8450	cullin 4B	Lawrence
CUX1	protein_coding	7	7q22.1	ENSG00000257923	1523	cut-like homeobox 1	Lawrence
CYLD	protein_coding	16	16q12.1	ENSG00000083799	1540	cylindromatosis (turban tumor syndrome)	COSMIC
DAXX	protein_coding	6	6p21.3	ENSG00000204209	1616	death-domain associated protein	COSMIC
DDB2	protein_coding	11	11p12-p11	ENSG00000134574	1643	damage-specific DNA binding protein 2, 48kDa	COSMIC
DDIT3	protein_coding	12	12q13.1-q13.2	ENSG00000175197	1649	DNA-damage-inducible transcript 3	COSMIC
DDX10	protein_coding	11	11q22-q23	ENSG00000178105	1662	DEAD (Asp-Glu-Ala-Asp) box polypeptide 10	COSMIC
DDX3X	protein_coding	X	Xp11.3-p11.23	ENSG00000215301	1654	DEAD (Asp-Glu-Ala-Asp) box helicase 3, X-linked	Lawrence
DDX5	protein_coding	17	17q21	ENSG00000108654	1655	DEAD (Asp-Glu-Ala-Asp) box helicase 5	Lawrence,COSMIC
DDX6	protein_coding	11	11q23.3	ENSG00000110367	1656	DEAD (Asp-Glu-Ala-Asp) box helicase 6	COSMIC
DEK	protein_coding	6	6p22.3	ENSG00000124795	7913	DEK oncogene	COSMIC
DIAPH1	protein_coding	5	5q31	ENSG00000131504	1729	diaphanous-related formin 1	Lawrence
DICER1	protein_coding	14	14q32.13	ENSG00000100697	23405	dicer 1, ribonuclease type III	COSMIC
DIS3	protein_coding	13	13q22.1	ENSG00000083520	22894	DIS3 mitotic control homolog (S. cerevisiae)	Lawrence
DNAH12	protein_coding	3	3p14.3	ENSG00000174844	201625	dynein, axonemal, heavy chain 12	Lawrence
DNER	protein_coding	2	2q36.3	ENSG00000187957	92737	delta/notch-like EGF repeat containing	Lawrence
DNM2	protein_coding	19	19p13.2	ENSG00000079805	1785	dynamin 2	COSMIC
DNMT3A	protein_coding	2	2p23	ENSG00000119772	1788	DNA (cytosine-5-)-methyltransferase 3 alpha	PanCancer,Lawrence,COSMIC
DUX4	protein_coding	4	4q35	ENSG00000258389	22947	double homeobox 4	COSMIC
SYMBOL	BIOTYPE	CHR	BAND	ENSEMBL	ENTREZ	DESCRIPTION	SOURCE
EBF1	protein_coding	5	5q34	ENSG00000164330	1879	early B-cell factor 1	COSMIC
ECT2L	protein_coding	6	6q24.1	ENSG00000203734	345930	epithelial cell transforming sequence 2 oncogene-like	COSMIC
EGFR	protein_coding	7	7p12	ENSG00000146648	1956	epidermal growth factor receptor	PanCancer,Lawrence,COSMIC
EGR3	protein_coding	8	8p23-p21	ENSG00000179388	1960	early growth response 3	PanCancer
EIF2S2	protein_coding	20	20q11.2	ENSG00000125977	8894	eukaryotic translation initiation factor 2, subunit 2 beta, 38kDa	Lawrence
EIF4A2	protein_coding	3	3q28	ENSG00000156976	1974	eukaryotic translation initiation factor 4A2	PanCancer,COSMIC
ELF3	protein_coding	1	1q32.2	ENSG00000163435	1999	E74-like factor 3 (ets domain transcription factor, epithelial-specific )	PanCancer,Lawrence
ELF4	protein_coding	X	Xq26	ENSG00000102034	2000	E74-like factor 4 (ets domain transcription factor)	COSMIC
ELK4	protein_coding	1	1q32	ENSG00000158711	2005	ELK4, ETS-domain protein (SRF accessory protein 1)	COSMIC
ELL	protein_coding	19	19p13.1	ENSG00000105656	8178	elongation factor RNA polymerase II	COSMIC
ELN	protein_coding	7	7q11.23	ENSG00000049540	2006	elastin	COSMIC
EML4	protein_coding	2	2p21	ENSG00000143924	27436	echinoderm microtubule associated protein like 4	COSMIC
EP300	protein_coding	22	22q13.2	ENSG00000100393	2033	E1A binding protein p300	PanCancer,Lawrence,COSMIC
EPHA2	protein_coding	1	1p36	ENSG00000142627	1969	EPH receptor A2	Lawrence
EPHA3	protein_coding	3	3p11.2	ENSG00000044524	2042	EPH receptor A3	PanCancer
EPHB6	protein_coding	7	7q33-q35	ENSG00000106123	2051	EPH receptor B6	PanCancer
EPPK1	protein_coding	8	8q24.3	ENSG00000227184	83481	epiplakin 1	PanCancer
EPS15	protein_coding	1	1p32	ENSG00000085832	2060	epidermal growth factor receptor pathway substrate 15	COSMIC
ERBB2	protein_coding	17	17q12	ENSG00000141736	2064	v-erb-b2 avian erythroblastic leukemia viral oncogene homolog 2	Lawrence,COSMIC
ERBB3	protein_coding	12	12q13	ENSG00000065361	2065	v-erb-b2 avian erythroblastic leukemia viral oncogene homolog 3	Lawrence
ERBB4	protein_coding	2	2q33.3-q34	ENSG00000178568	2066	v-erb-b2 avian erythroblastic leukemia viral oncogene homolog 4	PanCancer
ERC1	protein_coding	12	12p13.3	ENSG00000082805	23085	ELKS/RAB6-interacting/CAST family member 1	COSMIC
ERCC2	protein_coding	19	19q13.3	ENSG00000104884	2068	excision repair cross-complementing rodent repair deficiency, complementation group 2	PanCancer,Lawrence,COSMIC
ERCC3	protein_coding	2	2q21	ENSG00000163161	2071	excision repair cross-complementing rodent repair deficiency, complementation group 3	COSMIC
ERCC4	protein_coding	16	16p13.12	ENSG00000175595	2072	excision repair cross-complementing rodent repair deficiency, complementation group 4	COSMIC
ERCC5	protein_coding	13	13q33	ENSG00000134899	2073	excision repair cross-complementing rodent repair deficiency, complementation group 5	COSMIC
ERG	protein_coding	21	21q22.3	ENSG00000157554	2078	v-ets avian erythroblastosis virus E26 oncogene homolog	COSMIC
ETV1	protein_coding	7	7p21.3	ENSG00000006468	2115	ets variant 1	COSMIC
ETV4	protein_coding	17	17q21	ENSG00000175832	2118	ets variant 4	COSMIC
ETV5	protein_coding	3	3q28	ENSG00000244405	2119	ets variant 5	COSMIC
ETV6	protein_coding	12	12p13	ENSG00000139083	2120	ets variant 6	COSMIC
EWSR1	protein_coding	22	22q12.2	ENSG00000182944	2130	EWS RNA-binding protein 1	COSMIC
EXT1	protein_coding	8	8q24.11	ENSG00000182197	2131	exostosin glycosyltransferase 1	COSMIC
EXT2	protein_coding	11	11p12-p11	ENSG00000151348	2132	exostosin glycosyltransferase 2	COSMIC
EZH1	protein_coding	17	17q21.1-q21.3	ENSG00000108799	2145	enhancer of zeste homolog 1 (Drosophila)	Lawrence
EZH2	protein_coding	7	7q35-q36	ENSG00000106462	2146	enhancer of zeste homolog 2 (Drosophila)	PanCancer,Lawrence,COSMIC
EZR	protein_coding	6	6q25.3	ENSG00000092820	7430	ezrin	Lawrence,COSMIC
FAM166A	protein_coding	9	9q34.3	ENSG00000188163	401565	family with sequence similarity 166, member A	Lawrence
FAM46C	protein_coding	1	1p12	ENSG00000183508	54855	family with sequence similarity 46, member C	Lawrence,COSMIC
FANCA	protein_coding	16	16q24.3	ENSG00000187741	2175	Fanconi anemia, complementation group A	COSMIC
FANCC	protein_coding	9	9q22.3	ENSG00000158169	2176	Fanconi anemia, complementation group C	COSMIC
FANCD2	protein_coding	3	3p26	ENSG00000144554	2177	Fanconi anemia, complementation group D2	COSMIC
FANCE	protein_coding	6	6p22-p21	ENSG00000112039	2178	Fanconi anemia, complementation group E	COSMIC
FANCF	protein_coding	11	11p15	ENSG00000183161	2188	Fanconi anemia, complementation group F	COSMIC
FANCG	protein_coding	9	9p13	ENSG00000221829	2189	Fanconi anemia, complementation group G	COSMIC
FAS	protein_coding	10	10q24.1	ENSG00000026103	355	Fas cell surface death receptor	COSMIC
FAT1	protein_coding	4	4q35	ENSG00000083857	2195	FAT atypical cadherin 1	Lawrence
FBXO11	protein_coding	2	2p16.3	ENSG00000138081	80204	F-box protein 11	COSMIC
FBXW7	protein_coding	4	4q31.3	ENSG00000109670	55294	F-box and WD repeat domain containing 7, E3 ubiquitin protein ligase	PanCancer,Lawrence,COSMIC
FCGR2B	protein_coding	1	1q23	ENSG00000072694	2213	Fc fragment of IgG, low affinity IIb, receptor (CD32)	COSMIC
FCRL4	protein_coding	1	1q21	ENSG00000163518	83417	Fc receptor-like 4	COSMIC
FEV	protein_coding	2	2q36	ENSG00000163497	54738	FEV (ETS oncogene family)	COSMIC
FGFBP1	protein_coding	4	4p15.32	ENSG00000137440	9982	fibroblast growth factor binding protein 1	Lawrence
FGFR1	protein_coding	8	8p12	ENSG00000077782	2260	fibroblast growth factor receptor 1	COSMIC
FGFR1OP	protein_coding	6	6q27	ENSG00000213066	11116	FGFR1 oncogene partner	COSMIC
SYMBOL	BIOTYPE	CHR	BAND	ENSEMBL	ENTREZ	DESCRIPTION	SOURCE
FGFR2	protein_coding	10	10q26	ENSG00000066468	2263	fibroblast growth factor receptor 2	PanCancer,Lawrence,COSMIC
FGFR3	protein_coding	4	4p16.3	ENSG00000068078	2261	fibroblast growth factor receptor 3	PanCancer,Lawrence,COSMIC
FH	protein_coding	1	1q42.1	ENSG00000091483	2271	fumarate hydratase	COSMIC
FHIT	protein_coding	3	3p14.2	ENSG00000189283	2272	fragile histidine triad	COSMIC
FIP1L1	protein_coding	4	4q12	ENSG00000145216	81608	factor interacting with PAPOLA and CPSF1	COSMIC
FLCN	protein_coding	17	17p11.2	ENSG00000154803	201163	folliculin	COSMIC
FLG	protein_coding	1	1q21.3	ENSG00000143631	2312	filaggrin	Lawrence
FLI1	protein_coding	11	11q24.1-q24.3	ENSG00000151702	2313	Fli-1 proto-oncogene, ETS transcription factor	COSMIC
FLT3	protein_coding	13	13q12	ENSG00000122025	2322	fms-related tyrosine kinase 3	PanCancer,Lawrence,COSMIC
FNBP1	protein_coding	9	9q34	ENSG00000187239	23048	formin binding protein 1	COSMIC
FOXA1	protein_coding	14	14q12-q13	ENSG00000129514	3169	forkhead box A1	PanCancer,Lawrence
FOXA2	protein_coding	20	20p11	ENSG00000125798	3170	forkhead box A2	PanCancer
FOXL2	protein_coding	3	3q23	ENSG00000183770	668	forkhead box L2	COSMIC
FOXO1	protein_coding	13	13q14.1	ENSG00000150907	2308	forkhead box O1	COSMIC
FOXO3	protein_coding	6	6q21	ENSG00000118689	2309	forkhead box O3	COSMIC
FOXO4	protein_coding	X	Xq13.1	ENSG00000184481	4303	forkhead box O4	COSMIC
FOXP1	protein_coding	3	3p14.1	ENSG00000114861	27086	forkhead box P1	COSMIC
FOXQ1	protein_coding	6	6p25	ENSG00000164379	94234	forkhead box Q1	Lawrence
FRMD7	protein_coding	X	Xq26.2	ENSG00000165694	90167	FERM domain containing 7	Lawrence
FSTL3	protein_coding	19	19p13	ENSG00000070404	10272	follistatin-like 3 (secreted glycoprotein)	COSMIC
FUBP1	protein_coding	1	1p31.1	ENSG00000162613	8880	far upstream element (FUSE) binding protein 1	COSMIC
FUS	protein_coding	16	16p11.2	ENSG00000089280	2521	fused in sarcoma	COSMIC
GAS7	protein_coding	17	17p13.1	ENSG00000007237	8522	growth arrest-specific 7	COSMIC
GATA1	protein_coding	X	Xp11.23	ENSG00000102145	2623	GATA binding protein 1 (globin transcription factor 1)	COSMIC
GATA2	protein_coding	3	3q21.3	ENSG00000179348	2624	GATA binding protein 2	COSMIC
GATA3	protein_coding	10	10p15	ENSG00000107485	2625	GATA binding protein 3	PanCancer,Lawrence,COSMIC
GMPS	protein_coding	3	3q24	ENSG00000163655	8833	guanine monphosphate synthase	COSMIC
GNA11	protein_coding	19	19p13.3	ENSG00000088256	2767	guanine nucleotide binding protein (G protein), alpha 11 (Gq class)	COSMIC
GNA13	protein_coding	17	17q24.3	ENSG00000120063	10672	guanine nucleotide binding protein (G protein), alpha 13	Lawrence
GNAQ	protein_coding	9	9q21	ENSG00000156052	2776	guanine nucleotide binding protein (G protein), q polypeptide	COSMIC
GNAS	protein_coding	20	20q13.3	ENSG00000087460	2778	GNAS complex locus	COSMIC
GNB1	protein_coding	1	1p36.33	ENSG00000078369	2782	guanine nucleotide binding protein (G protein), beta polypeptide 1	Lawrence
GNPTAB	protein_coding	12	12q23.2	ENSG00000111670	79158	N-acetylglucosamine-1-phosphate transferase, alpha and beta subunits	Lawrence
GOLGA5	protein_coding	14	14q32.12	ENSG00000066455	9950	golgin A5	COSMIC
GOPC	protein_coding	6	6q21	ENSG00000047932	57120	golgi-associated PDZ and coiled-coil motif containing	COSMIC
GOT1	protein_coding	10	10q24.1-q25.1	ENSG00000120053	2805	glutamic-oxaloacetic transaminase 1, soluble	Lawrence
GPC3	protein_coding	X	Xq26.1	ENSG00000147257	2719	glypican 3	COSMIC
GPHN	protein_coding	14	14q23.3	ENSG00000171723	10243	gephyrin	COSMIC
GPS2	protein_coding	17	17p13	ENSG00000132522	2874	G protein pathway suppressor 2	Lawrence
GUSB	protein_coding	7	7q21.11	ENSG00000169919	2990	glucuronidase, beta	Lawrence
H3F3A	protein_coding	1	1q42.12	ENSG00000163041	3020	H3 histone, family 3A	COSMIC
H3F3C	protein_coding	12	12p11.21	ENSG00000188375	440093	H3 histone, family 3C	PanCancer
HERPUD1	protein_coding	16	16q13	ENSG00000051108	9709	homocysteine-inducible, endoplasmic reticulum stress-inducible, ubiquitin-like domain member 1	COSMIC
HEY1	protein_coding	8	8q21	ENSG00000164683	23462	hes-related family bHLH transcription factor with YRPW motif 1	COSMIC
HGF	protein_coding	7	7q21.1	ENSG00000019991	3082	hepatocyte growth factor (hepapoietin A; scatter factor)	PanCancer
HIP1	protein_coding	7	7q11.23	ENSG00000127946	3092	huntingtin interacting protein 1	COSMIC
HIST1H1C	protein_coding	6	6p21.3	ENSG00000187837	3006	histone cluster 1, H1c	PanCancer
HIST1H1E	protein_coding	6	6p21.3	ENSG00000168298	3008	histone cluster 1, H1e	Lawrence
HIST1H2BD	protein_coding	6	6p21.3	ENSG00000158373	3017	histone cluster 1, H2bd	PanCancer
HIST1H3B	protein_coding	6	6p22.1	ENSG00000124693	8358	histone cluster 1, H3b	Lawrence,COSMIC
HIST1H4E	protein_coding	6	6p22.1	ENSG00000198518	8367	histone cluster 1, H4e	Lawrence
HIST1H4I	protein_coding	6	6p21.33	ENSG00000198339	8294	histone cluster 1, H4i	COSMIC
HLA-A	protein_coding	6	6p21.3	ENSG00000206503	3105	major histocompatibility complex, class I, A	Lawrence,MHC
HLA-B	protein_coding	6	6p21.3	ENSG00000234745	3106	major histocompatibility complex, class I, B	Lawrence,MHC
HLF	protein_coding	17	17q22	ENSG00000108924	3131	hepatic leukemia factor	COSMIC
SYMBOL	BIOTYPE	CHR	BAND	ENSEMBL	ENTREZ	DESCRIPTION	SOURCE
HMGA1	protein_coding	6	6p21	ENSG00000137309	3159	high mobility group AT-hook 1	COSMIC
HMGA2	protein_coding	12	12q15	ENSG00000149948	8091	high mobility group AT-hook 2	COSMIC
HNF1A	protein_coding	12	12q24.2	ENSG00000135100	6927	HNF1 homeobox A	COSMIC
HNRNPA2B1	protein_coding	7	7p15	ENSG00000122566	3181	heterogeneous nuclear ribonucleoprotein A2/B1	COSMIC
HOOK3	protein_coding	8	8p11.21	ENSG00000168172	84376	hook microtubule-tethering protein 3	COSMIC
HOXA11	protein_coding	7	7p15.2	ENSG00000005073	3207	homeobox A11	COSMIC
HOXA13	protein_coding	7	7p15.2	ENSG00000106031	3209	homeobox A13	COSMIC
HOXA9	protein_coding	7	7p15.2	ENSG00000078399	3205	homeobox A9	COSMIC
HOXC11	protein_coding	12	12q13.3	ENSG00000123388	3227	homeobox C11	COSMIC
HOXC13	protein_coding	12	12q13.3	ENSG00000123364	3229	homeobox C13	COSMIC
HOXD11	protein_coding	2	2q31.1	ENSG00000128713	3237	homeobox D11	COSMIC
HOXD13	protein_coding	2	2q31.1	ENSG00000128714	3239	homeobox D13	COSMIC
HRAS	protein_coding	11	11p15.5	ENSG00000174775	3265	Harvey rat sarcoma viral oncogene homolog	Lawrence,COSMIC
HSP90AA1	protein_coding	14	14q32.33	ENSG00000080824	3320	heat shock protein 90kDa alpha (cytosolic), class A member 1	COSMIC
HSP90AB1	protein_coding	6	6p12	ENSG00000096384	3326	heat shock protein 90kDa alpha (cytosolic), class B member 1	Lawrence,COSMIC
IDH1	protein_coding	2	2q33.3	ENSG00000138413	3417	isocitrate dehydrogenase 1 (NADP+), soluble	PanCancer,Lawrence,COSMIC
IDH2	protein_coding	15	15q26.1	ENSG00000182054	3418	isocitrate dehydrogenase 2 (NADP+), mitochondrial	PanCancer,Lawrence,COSMIC
IKZF1	protein_coding	7	7p12.2	ENSG00000185811	10320	IKAROS family zinc finger 1 (Ikaros)	COSMIC
IL2	protein_coding	4	4q26-q27	ENSG00000109471	3558	interleukin 2	COSMIC
IL21R	protein_coding	16	16p11	ENSG00000103522	50615	interleukin 21 receptor	COSMIC
IL6ST	protein_coding	5	5q11.2	ENSG00000134352	3572	interleukin 6 signal transducer (gp130, oncostatin M receptor)	COSMIC
IL7R	protein_coding	5	5p13	ENSG00000168685	3575	interleukin 7 receptor	Lawrence,COSMIC
ING1	protein_coding	13	13q34	ENSG00000153487	3621	inhibitor of growth family, member 1	Lawrence
INPPL1	protein_coding	11	11q13	ENSG00000165458	3636	inositol polyphosphate phosphatase-like 1	Lawrence
INTS12	protein_coding	4	4q24	ENSG00000138785	57117	integrator complex subunit 12	Lawrence
IPO7	protein_coding	11	11p15.4	ENSG00000205339	10527	importin 7	Lawrence
IRF4	protein_coding	6	6p25-p23	ENSG00000137265	3662	interferon regulatory factor 4	Lawrence,COSMIC
IRF6	protein_coding	1	1q32.3-q41	ENSG00000117595	3664	interferon regulatory factor 6	Lawrence
ITGB7	protein_coding	12	12q13.13	ENSG00000139626	3695	integrin, beta 7	Lawrence
ITK	protein_coding	5	5q31-q32	ENSG00000113263	3702	IL2-inducible T-cell kinase	COSMIC
ITPKB	protein_coding	1	1q42.13	ENSG00000143772	3707	inositol-trisphosphate 3-kinase B	Lawrence
JAK1	protein_coding	1	1p32.3-p31.3	ENSG00000162434	3716	Janus kinase 1	COSMIC
JAK2	protein_coding	9	9p24	ENSG00000096968	3717	Janus kinase 2	COSMIC
JAK3	protein_coding	19	19p13.1	ENSG00000105639	3718	Janus kinase 3	COSMIC
JAZF1	protein_coding	7	7p15.2-p15.1	ENSG00000153814	221895	JAZF zinc finger 1	COSMIC
JUN	protein_coding	1	1p32-p31	ENSG00000177606	3725	jun proto-oncogene	COSMIC
KAT6A	protein_coding	8	8p11	ENSG00000083168	7994	K(lysine) acetyltransferase 6A	COSMIC
KAT6B	protein_coding	10	10q22.2	ENSG00000156650	23522	K(lysine) acetyltransferase 6B	COSMIC
KCNJ5	protein_coding	11	11q24	ENSG00000120457	3762	potassium inwardly-rectifying channel, subfamily J, member 5	COSMIC
KDM5A	protein_coding	12	12p11	ENSG00000073614	5927	lysine (K)-specific demethylase 5A	COSMIC
KDM5C	protein_coding	X	Xp11.22-p11.21	ENSG00000126012	8242	lysine (K)-specific demethylase 5C	PanCancer,Lawrence,COSMIC
KDM6A	protein_coding	X	Xp11.2	ENSG00000147050	7403	lysine (K)-specific demethylase 6A	PanCancer,Lawrence,COSMIC
KDR	protein_coding	4	4q11-q12	ENSG00000128052	3791	kinase insert domain receptor (a type III receptor tyrosine kinase)	COSMIC
KDSR	protein_coding	18	18q21.3	ENSG00000119537	2531	3-ketodihydrosphingosine reductase	COSMIC
KEAP1	protein_coding	19	19p13.2	ENSG00000079999	9817	kelch-like ECH-associated protein 1	PanCancer,Lawrence
KEL	protein_coding	7	7q33	ENSG00000197993	3792	Kell blood group, metallo-endopeptidase	Lawrence
KIAA1549	protein_coding	7	7q34	ENSG00000122778	57670	KIAA1549	COSMIC
KIF5B	protein_coding	10	10p11.22	ENSG00000170759	3799	kinesin family member 5B	COSMIC
KIT	protein_coding	4	4q12	ENSG00000157404	3815	v-kit Hardy-Zuckerman 4 feline sarcoma viral oncogene homolog	PanCancer,Lawrence,COSMIC
KLF4	protein_coding	9	9q31	ENSG00000136826	9314	Kruppel-like factor 4 (gut)	COSMIC
KLF6	protein_coding	10	10p15	ENSG00000067082	1316	Kruppel-like factor 6	COSMIC
KLHL8	protein_coding	4	4q22.1	ENSG00000145332	57563	kelch-like family member 8	Lawrence
KLK2	protein_coding	19	19q13.41	ENSG00000167751	3817	kallikrein-related peptidase 2	COSMIC
KMT2A	protein_coding	11	11q23	ENSG00000118058	4297	lysine (K)-specific methyltransferase 2A	Lawrence,COSMIC
KMT2B	protein_coding	19	19q13.1	ENSG00000272333	9757	lysine (K)-specific methyltransferase 2B	PanCancer,Lawrence
SYMBOL	BIOTYPE	CHR	BAND	ENSEMBL	ENTREZ	DESCRIPTION	SOURCE
KMT2C	protein_coding	7	7q36.1	ENSG00000055609	58508	lysine (K)-specific methyltransferase 2C	PanCancer,Lawrence,COSMIC
KMT2D	protein_coding	12	12q13.12	ENSG00000167548	8085	lysine (K)-specific methyltransferase 2D	PanCancer,Lawrence,COSMIC
KRAS	protein_coding	12	12p12.1	ENSG00000133703	3845	Kirsten rat sarcoma viral oncogene homolog	PanCancer,Lawrence,COSMIC
KTN1	protein_coding	14	14q22.1	ENSG00000126777	3895	kinectin 1 (kinesin receptor)	COSMIC
LASP1	protein_coding	17	17q11-q21.3	ENSG00000002834	3927	LIM and SH3 protein 1	COSMIC
LCK	protein_coding	1	1p34.3	ENSG00000182866	3932	lymphocyte-specific protein tyrosine kinase	COSMIC
LCP1	protein_coding	13	13q14.3	ENSG00000136167	3936	lymphocyte cytosolic protein 1 (L-plastin)	COSMIC
LCTL	protein_coding	15	15q22.31	ENSG00000188501	197021	lactase-like	Lawrence
LHFP	protein_coding	13	13q12	ENSG00000183722	10186	lipoma HMGIC fusion partner	COSMIC
LIFR	protein_coding	5	5p13-p12	ENSG00000113594	3977	leukemia inhibitory factor receptor alpha	PanCancer,COSMIC
LMO1	protein_coding	11	11p15	ENSG00000166407	4004	LIM domain only 1 (rhombotin 1)	COSMIC
LMO2	protein_coding	11	11p13	ENSG00000135363	4005	LIM domain only 2 (rhombotin-like 1)	COSMIC
LPP	protein_coding	3	3q28	ENSG00000145012	4026	LIM domain containing preferred translocation partner in lipoma	COSMIC
LRIG3	protein_coding	12	12q14.1	ENSG00000139263	121227	leucine-rich repeats and immunoglobulin-like domains 3	COSMIC
LRRK2	protein_coding	12	12q12	ENSG00000188906	120892	leucine-rich repeat kinase 2	PanCancer
LYL1	protein_coding	19	19p13.2	ENSG00000104903	4066	lymphoblastic leukemia derived sequence 1	COSMIC
MAF	protein_coding	16	16q22-q23	ENSG00000178573	4094	v-maf avian musculoaponeurotic fibrosarcoma oncogene homolog	COSMIC
MAFB	protein_coding	20	20q11.2-q13.1	ENSG00000204103	9935	v-maf avian musculoaponeurotic fibrosarcoma oncogene homolog B	COSMIC
MALT1	protein_coding	18	18q21	ENSG00000172175	10892	mucosa associated lymphoid tissue lymphoma translocation gene 1	COSMIC
MAML2	protein_coding	11	11q21	ENSG00000184384	84441	mastermind-like 2 (Drosophila)	COSMIC
MAP2K1	protein_coding	15	15q22.1-q22.33	ENSG00000169032	5604	mitogen-activated protein kinase kinase 1	Lawrence,COSMIC
MAP2K2	protein_coding	19	19p13.3	ENSG00000126934	5605	mitogen-activated protein kinase kinase 2	COSMIC
MAP2K4	protein_coding	17	17p12	ENSG00000065559	6416	mitogen-activated protein kinase kinase 4	PanCancer,Lawrence,COSMIC
MAP3K1	protein_coding	5	5q11.2	ENSG00000095015	4214	mitogen-activated protein kinase kinase kinase 1, E3 ubiquitin protein ligase	PanCancer,Lawrence
MAP4K3	protein_coding	2	2p22.1	ENSG00000011566	8491	mitogen-activated protein kinase kinase kinase kinase 3	Lawrence
MAPK8IP1	protein_coding	11	11p11.2	ENSG00000121653	9479	mitogen-activated protein kinase 8 interacting protein 1	PanCancer
MAX	protein_coding	14	14q23	ENSG00000125952	4149	MYC associated factor X	COSMIC
MBD1	protein_coding	18	18q21	ENSG00000141644	4152	methyl-CpG binding domain protein 1	Lawrence
MDM2	protein_coding	12	12q14.3-q15	ENSG00000135679	4193	MDM2 oncogene, E3 ubiquitin protein ligase	COSMIC
MDM4	protein_coding	1	1q32	ENSG00000198625	4194	Mdm4 p53 binding protein homolog (mouse)	COSMIC
MDS2	protein_coding	1	1p36	ENSG00000197880	259283	myelodysplastic syndrome 2 translocation associated	COSMIC
MECOM	protein_coding	3	3q26.2	ENSG00000085276	2122	MDS1 and EVI1 complex locus	PanCancer,COSMIC
MED12	protein_coding	X	Xq13	ENSG00000184634	9968	mediator complex subunit 12	Lawrence,COSMIC
MED23	protein_coding	6	6q22.33-q24.1	ENSG00000112282	9439	mediator complex subunit 23	Lawrence
MEN1	protein_coding	11	11q13	ENSG00000133895	4221	multiple endocrine neoplasia I	COSMIC
MET	protein_coding	7	7q31	ENSG00000105976	4233	met proto-oncogene	Lawrence,COSMIC
MGA	protein_coding	15	15q14	ENSG00000174197	23269	MGA, MAX dimerization protein	Lawrence
MICALCL	protein_coding	11	11p15.3	ENSG00000133808	84953	MICAL C-terminal like	Lawrence
MITF	protein_coding	3	3p14.2-p14.1	ENSG00000187098	4286	microphthalmia-associated transcription factor	COSMIC
MKL1	protein_coding	22	22q13	ENSG00000196588	57591	megakaryoblastic leukemia (translocation) 1	COSMIC
MLF1	protein_coding	3	3q25.1	ENSG00000178053	4291	myeloid leukemia factor 1	COSMIC
MLH1	protein_coding	3	3p21.3	ENSG00000076242	4292	mutL homolog 1	COSMIC
MLLT1	protein_coding	19	19p13.3	ENSG00000130382	4298	myeloid/lymphoid or mixed-lineage leukemia (trithorax homolog, Drosophila); translocated to, 1	COSMIC
MLLT10	protein_coding	10	10p12	ENSG00000078403	8028	myeloid/lymphoid or mixed-lineage leukemia (trithorax homolog, Drosophila); translocated to, 10	COSMIC
MLLT11	protein_coding	1	1q21	ENSG00000213190	10962	myeloid/lymphoid or mixed-lineage leukemia (trithorax homolog, Drosophila); translocated to, 11	COSMIC
MLLT3	protein_coding	9	9p22	ENSG00000171843	4300	myeloid/lymphoid or mixed-lineage leukemia (trithorax homolog, Drosophila); translocated to, 3	COSMIC
MLLT4	protein_coding	6	6q27	ENSG00000130396	4301	myeloid/lymphoid or mixed-lineage leukemia (trithorax homolog, Drosophila); translocated to, 4	COSMIC
MLLT6	protein_coding	17	17q21	ENSG00000108292	4302	myeloid/lymphoid or mixed-lineage leukemia (trithorax homolog, Drosophila); translocated to, 6	COSMIC
MN1	protein_coding	22	22q12.1	ENSG00000169184	4330	meningioma (disrupted in balanced translocation) 1	COSMIC
MNX1	protein_coding	7	7q36	ENSG00000130675	3110	motor neuron and pancreas homeobox 1	COSMIC
MORC4	protein_coding	X	Xq22.3	ENSG00000133131	79710	MORC family CW-type zinc finger 4	Lawrence
MPL	protein_coding	1	1p34	ENSG00000117400	4352	myeloproliferative leukemia virus oncogene	COSMIC
MPO	protein_coding	17	17q23.1	ENSG00000005381	4353	myeloperoxidase	Lawrence
MSH2	protein_coding	2	2p21	ENSG00000095002	4436	mutS homolog 2	COSMIC
MSH6	protein_coding	2	2p16	ENSG00000116062	2956	mutS homolog 6	COSMIC
SYMBOL	BIOTYPE	CHR	BAND	ENSEMBL	ENTREZ	DESCRIPTION	SOURCE
MSI2	protein_coding	17	17q22	ENSG00000153944	124540	musashi RNA-binding protein 2	COSMIC
MSN	protein_coding	X	Xq11.1	ENSG00000147065	4478	moesin	COSMIC
MTCP1	protein_coding	X	Xq28	ENSG00000214827	4515	mature T-cell proliferation 1	COSMIC
MTOR	protein_coding	1	1p36.2	ENSG00000198793	2475	mechanistic target of rapamycin (serine/threonine kinase)	PanCancer,Lawrence
MUC1	protein_coding	1	1q21	ENSG00000185499	4582	mucin 1, cell surface associated	COSMIC
MUC17	protein_coding	7	7q22.1	ENSG00000169876	140453	mucin 17, cell surface associated	Lawrence
MUTYH	protein_coding	1	1p34.1	ENSG00000132781	4595	mutY homolog	COSMIC
MXRA5	protein_coding	X	Xp22.33	ENSG00000101825	25878	matrix-remodelling associated 5	Lawrence
MYB	protein_coding	6	6q22-q23	ENSG00000118513	4602	v-myb avian myeloblastosis viral oncogene homolog	Lawrence,COSMIC
MYC	protein_coding	8	8q24.21	ENSG00000136997	4609	v-myc avian myelocytomatosis viral oncogene homolog	COSMIC
MYCL	protein_coding	1	1p34.2	ENSG00000116990	4610	v-myc avian myelocytomatosis viral oncogene lung carcinoma derived homolog	COSMIC
MYCN	protein_coding	2	2p24.3	ENSG00000134323	4613	v-myc avian myelocytomatosis viral oncogene neuroblastoma derived homolog	Lawrence,COSMIC
MYD88	protein_coding	3	3p22	ENSG00000172936	4615	myeloid differentiation primary response 88	Lawrence,COSMIC
MYH11	protein_coding	16	16p13.11	ENSG00000133392	4629	myosin, heavy chain 11, smooth muscle	COSMIC
MYH9	protein_coding	22	22q13.1	ENSG00000100345	4627	myosin, heavy chain 9, non-muscle	COSMIC
MYOCD	protein_coding	17	17p11.2	ENSG00000141052	93649	myocardin	Lawrence
NACA	protein_coding	12	12q23-q24.1	ENSG00000196531	4666	nascent polypeptide-associated complex alpha subunit	COSMIC
NAV3	protein_coding	12	12q14.3	ENSG00000067798	89795	neuron navigator 3	PanCancer
NBN	protein_coding	8	8q21	ENSG00000104320	4683	nibrin	COSMIC
NBPF1	protein_coding	1	1p36.13	ENSG00000219481	55672	neuroblastoma breakpoint family, member 1	Lawrence
NCKIPSD	protein_coding	3	3p21	ENSG00000213672	51517	NCK interacting protein with SH3 domain	COSMIC
NCOA1	protein_coding	2	2p23	ENSG00000084676	8648	nuclear receptor coactivator 1	COSMIC
NCOA2	protein_coding	8	8q13.3	ENSG00000140396	10499	nuclear receptor coactivator 2	COSMIC
NCOA4	protein_coding	10	10q11.2	ENSG00000138293	8031	nuclear receptor coactivator 4	COSMIC
NCOR1	protein_coding	17	17p11.2	ENSG00000141027	9611	nuclear receptor corepressor 1	PanCancer,Lawrence
NDRG1	protein_coding	8	8q24.3	ENSG00000104419	10397	N-myc downstream regulated 1	COSMIC
NF1	protein_coding	17	17q11.2	ENSG00000196712	4763	neurofibromin 1	PanCancer,Lawrence,COSMIC
NF2	protein_coding	22	22q12.2	ENSG00000186575	4771	neurofibromin 2 (merlin)	COSMIC
NFE2L2	protein_coding	2	2q31	ENSG00000116044	4780	nuclear factor, erythroid 2-like 2	PanCancer,Lawrence,COSMIC
NFE2L3	protein_coding	7	7p15.2	ENSG00000050344	9603	nuclear factor, erythroid 2-like 3	PanCancer
NFIB	protein_coding	9	9p24.1	ENSG00000147862	4781	nuclear factor I/B	COSMIC
NFKB2	protein_coding	10	10q24	ENSG00000077150	4791	nuclear factor of kappa light polypeptide gene enhancer in B-cells 2 (p49/p100)	COSMIC
NIN	protein_coding	14	14q22.1	ENSG00000100503	51199	ninein (GSK3B interacting protein)	COSMIC
NKX2-1	protein_coding	14	14q13	ENSG00000136352	7080	NK2 homeobox 1	COSMIC
NONO	protein_coding	X	Xq13.1	ENSG00000147140	4841	non-POU domain containing, octamer-binding	COSMIC
NOTCH1	protein_coding	9	9q34.3	ENSG00000148400	4851	notch 1	PanCancer,Lawrence,COSMIC
NOTCH2	protein_coding	1	1p13-p11	ENSG00000134250	4853	notch 2	COSMIC
NPM1	protein_coding	5	5q35.1	ENSG00000181163	4869	nucleophosmin (nucleolar phosphoprotein B23, numatrin)	PanCancer,Lawrence,COSMIC
NR4A3	protein_coding	9	9q22	ENSG00000119508	8013	nuclear receptor subfamily 4, group A, member 3	COSMIC
NRAS	protein_coding	1	1p13.2	ENSG00000213281	4893	neuroblastoma RAS viral (v-ras) oncogene homolog	PanCancer,Lawrence,COSMIC
NSD1	protein_coding	5	5q35	ENSG00000165671	64324	nuclear receptor binding SET domain protein 1	PanCancer,Lawrence,COSMIC
NT5C2	protein_coding	10	10q24.32	ENSG00000076685	22978	5'-nucleotidase, cytosolic II	COSMIC
NTN4	protein_coding	12	12q22	ENSG00000074527	59277	netrin 4	Lawrence
NTRK1	protein_coding	1	1q21-q22	ENSG00000198400	4914	neurotrophic tyrosine kinase, receptor, type 1	COSMIC
NTRK3	protein_coding	15	15q25	ENSG00000140538	4916	neurotrophic tyrosine kinase, receptor, type 3	COSMIC
NUMA1	protein_coding	11	11q13	ENSG00000137497	4926	nuclear mitotic apparatus protein 1	COSMIC
NUP210L	protein_coding	1	1q21.3	ENSG00000143552	91181	nucleoporin 210kDa-like	Lawrence
NUP214	protein_coding	9	9q34.1	ENSG00000126883	8021	nucleoporin 214kDa	COSMIC
NUP98	protein_coding	11	11p15.5	ENSG00000110713	4928	nucleoporin 98kDa	COSMIC
NUTM1	protein_coding	15	15q14	ENSG00000184507	256646	NUT midline carcinoma, family member 1	COSMIC
NUTM2A	protein_coding	10	10q23.2	ENSG00000184923	728118	NUT family member 2A	COSMIC
NUTM2B	protein_coding	10	10q22.3	ENSG00000188199	729262	NUT family member 2B	COSMIC
ODAM	protein_coding	4	4q13.3	ENSG00000109205	54959	odontogenic, ameloblast asssociated	Lawrence
OLIG2	protein_coding	21	21q22.11	ENSG00000205927	10215	oligodendrocyte lineage transcription factor 2	COSMIC
OMA1	protein_coding	1	1p32.2-p32.1	ENSG00000162600	115209	OMA1 zinc metallopeptidase	Lawrence
SYMBOL	BIOTYPE	CHR	BAND	ENSEMBL	ENTREZ	DESCRIPTION	SOURCE
OMD	protein_coding	9	9q22.31	ENSG00000127083	4958	osteomodulin	COSMIC
OR4A16	protein_coding	11	11q11	ENSG00000181961	81327	olfactory receptor, family 4, subfamily A, member 16	Lawrence
OR52N1	protein_coding	11	11p15.4	ENSG00000181001	79473	olfactory receptor, family 52, subfamily N, member 1	Lawrence
OTUD7A	protein_coding	15	15q13.3	ENSG00000169918	161725	OTU domain containing 7A	Lawrence
P2RY8	protein_coding	X	Xp22.33; Yp11.3	ENSG00000182162	286530	purinergic receptor P2Y, G-protein coupled, 8	COSMIC
PAFAH1B2	protein_coding	11	11q23	ENSG00000168092	5049	platelet-activating factor acetylhydrolase 1b, catalytic subunit 2 (30kDa)	COSMIC
PALB2	protein_coding	16	16p12.2	ENSG00000083093	79728	partner and localizer of BRCA2	COSMIC
PAPD5	protein_coding	16	16q12.1	ENSG00000121274	64282	PAP associated domain containing 5	Lawrence
PATZ1	protein_coding	22	22q12.2	ENSG00000100105	23598	POZ (BTB) and AT hook containing zinc finger 1	COSMIC
PAX3	protein_coding	2	2q35	ENSG00000135903	5077	paired box 3	COSMIC
PAX5	protein_coding	9	9p13	ENSG00000196092	5079	paired box 5	COSMIC
PAX7	protein_coding	1	1p36.13	ENSG00000009709	5081	paired box 7	COSMIC
PAX8	protein_coding	2	2q13	ENSG00000125618	7849	paired box 8	COSMIC
PBRM1	protein_coding	3	3p21	ENSG00000163939	55193	polybromo 1	PanCancer,Lawrence,COSMIC
PBX1	protein_coding	1	1q23	ENSG00000185630	5087	pre-B-cell leukemia homeobox 1	COSMIC
PCBP1	protein_coding	2	2p13-p12	ENSG00000169564	5093	poly(rC) binding protein 1	PanCancer,Lawrence
PCM1	protein_coding	8	8p22-p21.3	ENSG00000078674	5108	pericentriolar material 1	COSMIC
PCSK7	protein_coding	11	11q23-q24	ENSG00000160613	9159	proprotein convertase subtilisin/kexin type 7	COSMIC
PDAP1	protein_coding	7	7q22.1	ENSG00000106244	11333	PDGFA associated protein 1	Lawrence
PDCD1LG2	protein_coding	9	9p24.2	ENSG00000197646	80380	programmed cell death 1 ligand 2	COSMIC
PDCD2L	protein_coding	19	19q13.11	ENSG00000126249	84306	programmed cell death 2-like	Lawrence
PDE4DIP	protein_coding	1	1q12	ENSG00000178104	9659	phosphodiesterase 4D interacting protein	COSMIC
PDGFB	protein_coding	22	22q13.1	ENSG00000100311	5155	platelet-derived growth factor beta polypeptide	COSMIC
PDGFRA	protein_coding	4	4q12	ENSG00000134853	5156	platelet-derived growth factor receptor, alpha polypeptide	PanCancer,COSMIC
PDGFRB	protein_coding	5	5q33.1	ENSG00000113721	5159	platelet-derived growth factor receptor, beta polypeptide	COSMIC
PDSS2	protein_coding	6	6q21	ENSG00000164494	57107	prenyl (decaprenyl) diphosphate synthase, subunit 2	Lawrence
PER1	protein_coding	17	17p13.1	ENSG00000179094	5187	period circadian clock 1	COSMIC
PHF6	protein_coding	X	Xq26.3	ENSG00000156531	84295	PHD finger protein 6	PanCancer,Lawrence,COSMIC
PHOX2B	protein_coding	4	4p12	ENSG00000109132	8929	paired-like homeobox 2b	COSMIC
PICALM	protein_coding	11	11q14	ENSG00000073921	8301	phosphatidylinositol binding clathrin assembly protein	COSMIC
PIK3CA	protein_coding	3	3q26.3	ENSG00000121879	5290	phosphatidylinositol-4,5-bisphosphate 3-kinase, catalytic subunit alpha	PanCancer,Lawrence,COSMIC
PIK3CG	protein_coding	7	7q22.3	ENSG00000105851	5294	phosphatidylinositol-4,5-bisphosphate 3-kinase, catalytic subunit gamma	PanCancer
PIK3R1	protein_coding	5	5q13.1	ENSG00000145675	5295	phosphoinositide-3-kinase, regulatory subunit 1 (alpha)	PanCancer,Lawrence,COSMIC
PIM1	protein_coding	6	6p21.2	ENSG00000137193	5292	pim-1 oncogene	COSMIC
PLAG1	protein_coding	8	8q12	ENSG00000181690	5324	pleiomorphic adenoma gene 1	COSMIC
PLCG2	protein_coding	16	16q24.1	ENSG00000197943	5336	phospholipase C, gamma 2 (phosphatidylinositol-specific)	Lawrence
PML	protein_coding	15	15q22	ENSG00000140464	5371	promyelocytic leukemia	COSMIC
PMS1	protein_coding	2	2q31.1	ENSG00000064933	5378	PMS1 postmeiotic segregation increased 1 (S. cerevisiae)	COSMIC
PMS2	protein_coding	7	7p22.2	ENSG00000122512	5395	PMS2 postmeiotic segregation increased 2 (S. cerevisiae)	COSMIC
POLE	protein_coding	12	12q24.3	ENSG00000177084	5426	polymerase (DNA directed), epsilon, catalytic subunit	Lawrence
POLQ	protein_coding	3	3q13.33	ENSG00000051341	10721	polymerase (DNA directed), theta	PanCancer
POT1	protein_coding	7	7q31.33	ENSG00000128513	25913	protection of telomeres 1	COSMIC
POU2AF1	protein_coding	11	11q23.1	ENSG00000110777	5450	POU class 2 associating factor 1	Lawrence,COSMIC
POU2F2	protein_coding	19	19q13.2	ENSG00000028277	5452	POU class 2 homeobox 2	Lawrence
POU5F1	protein_coding	6	6p21.31	ENSG00000204531	5460	POU class 5 homeobox 1	COSMIC
PPARG	protein_coding	3	3p25	ENSG00000132170	5468	peroxisome proliferator-activated receptor gamma	COSMIC
PPM1D	protein_coding	17	17q23.2	ENSG00000170836	8493	protein phosphatase, Mg2+/Mn2+ dependent, 1D	Lawrence
PPP2R1A	protein_coding	19	19q13.41	ENSG00000105568	5518	protein phosphatase 2, regulatory subunit A, alpha	PanCancer,Lawrence,COSMIC
PPP6C	protein_coding	9	9q33.3	ENSG00000119414	5537	protein phosphatase 6, catalytic subunit	Lawrence
PRCC	protein_coding	1	1q21.1	ENSG00000143294	5546	papillary renal cell carcinoma (translocation-associated)	COSMIC
PRDM1	protein_coding	6	6q21	ENSG00000057657	639	PR domain containing 1, with ZNF domain	Lawrence,COSMIC
PRDM16	protein_coding	1	1p36.23-p33	ENSG00000142611	63976	PR domain containing 16	COSMIC
PRF1	protein_coding	10	10q22	ENSG00000180644	5551	perforin 1 (pore forming protein)	COSMIC
PRKAR1A	protein_coding	17	17q23-q24	ENSG00000108946	5573	protein kinase, cAMP-dependent, regulatory, type I, alpha	COSMIC
PRRX1	protein_coding	1	1q24	ENSG00000116132	5396	paired related homeobox 1	COSMIC
SYMBOL	BIOTYPE	CHR	BAND	ENSEMBL	ENTREZ	DESCRIPTION	SOURCE
PRX	protein_coding	19	19q13.2	ENSG00000105227	57716	periaxin	PanCancer
PSIP1	protein_coding	9	9p22.3	ENSG00000164985	11168	PC4 and SFRS1 interacting protein 1	COSMIC
PTCH1	protein_coding	9	9q22.3	ENSG00000185920	5727	patched 1	COSMIC
PTEN	protein_coding	10	10q23.3	ENSG00000171862	5728	phosphatase and tensin homolog	PanCancer,Lawrence,COSMIC
PTPN11	protein_coding	12	12q24	ENSG00000179295	5781	protein tyrosine phosphatase, non-receptor type 11	PanCancer,Lawrence,COSMIC
PTPRC	protein_coding	1	1q31-q32	ENSG00000081237	5788	protein tyrosine phosphatase, receptor type, C	COSMIC
QKI	protein_coding	6	6q26	ENSG00000112531	9444	QKI, KH domain containing, RNA binding	Lawrence
RAB40A	protein_coding	X	Xq22.1	ENSG00000172476	142684	RAB40A, member RAS oncogene family	Lawrence
RABEP1	protein_coding	17	17p13.2	ENSG00000029725	9135	rabaptin, RAB GTPase binding effector protein 1	COSMIC
RAC1	protein_coding	7	7p22	ENSG00000136238	5879	ras-related C3 botulinum toxin substrate 1 (rho family, small GTP binding protein Rac1)	Lawrence,COSMIC
RAD21	protein_coding	8	8q24	ENSG00000164754	5885	RAD21 homolog (S. pombe)	PanCancer,Lawrence,COSMIC
RAD51B	protein_coding	14	14q23-q24.2	ENSG00000182185	5890	RAD51 paralog B	COSMIC
RAF1	protein_coding	3	3p25	ENSG00000132155	5894	v-raf-1 murine leukemia viral oncogene homolog 1	COSMIC
RALGDS	protein_coding	9	9q34.3	ENSG00000160271	5900	ral guanine nucleotide dissociation stimulator	COSMIC
RANBP17	protein_coding	5	5q34	ENSG00000204764	64901	RAN binding protein 17	COSMIC
RAP1GDS1	protein_coding	4	4q23-q25	ENSG00000138698	5910	RAP1, GTP-GDP dissociation stimulator 1	COSMIC
RARA	protein_coding	17	17q21	ENSG00000131759	5914	retinoic acid receptor, alpha	COSMIC
RASA1	protein_coding	5	5q13.3	ENSG00000145715	5921	RAS p21 protein activator (GTPase activating protein) 1	Lawrence
RB1	protein_coding	13	13q14.2	ENSG00000139687	5925	retinoblastoma 1	PanCancer,Lawrence,COSMIC
RBM10	protein_coding	X	Xp11.23	ENSG00000182872	8241	RNA binding motif protein 10	Lawrence
RBM15	protein_coding	1	1p13	ENSG00000162775	64783	RNA binding motif protein 15	COSMIC
RECQL4	protein_coding	8	8q24.3	ENSG00000160957	9401	RecQ protein-like 4	COSMIC
REL	protein_coding	2	2p13-p12	ENSG00000162924	5966	v-rel avian reticuloendotheliosis viral oncogene homolog	COSMIC
RET	protein_coding	10	10q11.2	ENSG00000165731	5979	ret proto-oncogene	COSMIC
RHEB	protein_coding	7	7q36	ENSG00000106615	6009	Ras homolog enriched in brain	Lawrence
RHOA	protein_coding	3	3p21.3	ENSG00000067560	387	ras homolog family member A	Lawrence
RHOH	protein_coding	4	4p13	ENSG00000168421	399	ras homolog family member H	COSMIC
RIT1	protein_coding	1	1q22	ENSG00000143622	6016	Ras-like without CAAX 1	Lawrence
RMI2	protein_coding	16	16p13.13	ENSG00000175643	116028	RecQ mediated genome instability 2	COSMIC
RNF213	protein_coding	17	17q25.3	ENSG00000173821	57674	ring finger protein 213	COSMIC
RNF43	protein_coding	17	17q22	ENSG00000108375	54894	ring finger protein 43	COSMIC
ROS1	protein_coding	6	6q22	ENSG00000047936	6098	c-ros oncogene 1 , receptor tyrosine kinase	COSMIC
RPL10	protein_coding	X	Xq28	ENSG00000147403	6134	ribosomal protein L10	COSMIC
RPL22	protein_coding	1	1p36.31	ENSG00000116251	6146	ribosomal protein L22	PanCancer,COSMIC
RPL5	protein_coding	1	1p22.1	ENSG00000122406	6125	ribosomal protein L5	PanCancer,Lawrence,COSMIC
RPN1	protein_coding	3	3q21.3	ENSG00000163902	6184	ribophorin I	COSMIC
RPS15	protein_coding	19	19p13.3	ENSG00000115268	6209	ribosomal protein S15	Lawrence
RPS2	protein_coding	16	16p13.3	ENSG00000140988	6187	ribosomal protein S2	Lawrence
RSBN1L	protein_coding	7	7q11.23	ENSG00000187257	222194	round spermatid basic protein 1-like	Lawrence
RUNX1	protein_coding	21	21q22.3	ENSG00000159216	861	runt-related transcription factor 1	PanCancer,Lawrence,COSMIC
RUNX1T1	protein_coding	8	8q22	ENSG00000079102	862	runt-related transcription factor 1; translocated to, 1 (cyclin D-related)	COSMIC
RXRA	protein_coding	9	9q34.3	ENSG00000186350	6256	retinoid X receptor, alpha	Lawrence
SACS	protein_coding	13	13q12	ENSG00000151835	26278	spastic ataxia of Charlevoix-Saguenay (sacsin)	Lawrence
SBDS	protein_coding	7	7q11.21	ENSG00000126524	51119	Shwachman-Bodian-Diamond syndrome	COSMIC
SDC4	protein_coding	20	20q12	ENSG00000124145	6385	syndecan 4	COSMIC
SDHAF2	protein_coding	11	11q12.2	ENSG00000167985	54949	succinate dehydrogenase complex assembly factor 2	COSMIC
SDHB	protein_coding	1	1p36.1-p35	ENSG00000117118	6390	succinate dehydrogenase complex, subunit B, iron sulfur (Ip)	COSMIC
SDHC	protein_coding	1	1q23.3	ENSG00000143252	6391	succinate dehydrogenase complex, subunit C, integral membrane protein, 15kDa	COSMIC
SDHD	protein_coding	11	11q23	ENSG00000204370	6392	succinate dehydrogenase complex, subunit D, integral membrane protein	COSMIC
SELP	protein_coding	1	1q22-q25	ENSG00000174175	6403	selectin P (granule membrane protein 140kDa, antigen CD62)	Lawrence
SEPT12	protein_coding	16	16p13.3	ENSG00000140623	124404	septin 12	Lawrence
SEPT5	protein_coding	22	22q11.21	ENSG00000184702	5413	septin 5	COSMIC
SEPT6	protein_coding	X	Xq24	ENSG00000125354	23157	septin 6	COSMIC
SEPT9	protein_coding	17	17q25	ENSG00000184640	10801	septin 9	COSMIC
SERPINB13	protein_coding	18	18q21.33	ENSG00000197641	5275	serpin peptidase inhibitor, clade B (ovalbumin), member 13	Lawrence
SYMBOL	BIOTYPE	CHR	BAND	ENSEMBL	ENTREZ	DESCRIPTION	SOURCE
SET	protein_coding	9	9q34	ENSG00000119335	6418	SET nuclear oncogene	COSMIC
SETBP1	protein_coding	18	18q21.1	ENSG00000152217	26040	SET binding protein 1	PanCancer,COSMIC
SETD2	protein_coding	3	3p21.31	ENSG00000181555	29072	SET domain containing 2	PanCancer,Lawrence,COSMIC
SETDB1	protein_coding	1	1q21	ENSG00000143379	9869	SET domain, bifurcated 1	Lawrence
SF3B1	protein_coding	2	2q33.1	ENSG00000115524	23451	splicing factor 3b, subunit 1, 155kDa	PanCancer,Lawrence,COSMIC
SFPQ	protein_coding	1	1p34.3	ENSG00000116560	6421	splicing factor proline/glutamine-rich	COSMIC
SGK1	protein_coding	6	6q23	ENSG00000118515	6446	serum/glucocorticoid regulated kinase 1	Lawrence
SH2B3	protein_coding	12	12q24	ENSG00000111252	10019	SH2B adaptor protein 3	COSMIC
SH3GL1	protein_coding	19	19p13.3	ENSG00000141985	6455	SH3-domain GRB2-like 1	COSMIC
SIN3A	protein_coding	15	15q24.2	ENSG00000169375	25942	SIN3 transcription regulator family member A	PanCancer
SIRT4	protein_coding	12	12q	ENSG00000089163	23409	sirtuin 4	Lawrence
SLC1A3	protein_coding	5	5p13	ENSG00000079215	6507	solute carrier family 1 (glial high affinity glutamate transporter), member 3	Lawrence
SLC26A3	protein_coding	7	7q31	ENSG00000091138	1811	solute carrier family 26 (anion exchanger), member 3	Lawrence
SLC34A2	protein_coding	4	4p15.2	ENSG00000157765	10568	solute carrier family 34 (type II sodium/phosphate contransporter), member 2	COSMIC
SLC44A3	protein_coding	1	1p21.3	ENSG00000143036	126969	solute carrier family 44, member 3	Lawrence
SLC45A3	protein_coding	1	1q32.1	ENSG00000158715	85414	solute carrier family 45, member 3	COSMIC
SLC4A5	protein_coding	2	2p13	ENSG00000188687	57835	solute carrier family 4 (sodium bicarbonate cotransporter), member 5	Lawrence
SMAD2	protein_coding	18	18q21.1	ENSG00000175387	4087	SMAD family member 2	PanCancer,Lawrence
SMAD4	protein_coding	18	18q21.1	ENSG00000141646	4089	SMAD family member 4	PanCancer,Lawrence,COSMIC
SMARCA4	protein_coding	19	19p13.2	ENSG00000127616	6597	SWI/SNF related, matrix associated, actin dependent regulator of chromatin, subfamily a, member 4	Lawrence,COSMIC
SMARCB1	protein_coding	22	22q11.23|22q11	ENSG00000099956	6598	SWI/SNF related, matrix associated, actin dependent regulator of chromatin, subfamily b, member 1	Lawrence,COSMIC
SMARCE1	protein_coding	17	17q21.2	ENSG00000073584	6605	SWI/SNF related, matrix associated, actin dependent regulator of chromatin, subfamily e, member 1	COSMIC
SMC1A	protein_coding	X	Xp11.22-p11.21	ENSG00000072501	8243	structural maintenance of chromosomes 1A	PanCancer,Lawrence
SMC3	protein_coding	10	10q25	ENSG00000108055	9126	structural maintenance of chromosomes 3	PanCancer,Lawrence
SMO	protein_coding	7	7q32.3	ENSG00000128602	6608	smoothened, frizzled family receptor	COSMIC
SNX25	protein_coding	4	4q35.1	ENSG00000109762	83891	sorting nexin 25	Lawrence
SNX29	protein_coding	16	16p13.13-p13.12	ENSG00000048471	92017	sorting nexin 29	COSMIC
SOCS1	protein_coding	16	16p13.13	ENSG00000185338	8651	suppressor of cytokine signaling 1	COSMIC
SOS1	protein_coding	2	2p21	ENSG00000115904	6654	son of sevenless homolog 1 (Drosophila)	Lawrence
SOX17	protein_coding	8	8q11.23	ENSG00000164736	64321	SRY (sex determining region Y)-box 17	PanCancer,Lawrence
SOX2	protein_coding	3	3q26.3-q27	ENSG00000181449	6657	SRY (sex determining region Y)-box 2	COSMIC
SOX9	protein_coding	17	17q24.3	ENSG00000125398	6662	SRY (sex determining region Y)-box 9	PanCancer
SPECC1	protein_coding	17	17p11.2	ENSG00000128487	92521	sperm antigen with calponin homology and coiled-coil domains 1	COSMIC
SPEN	protein_coding	1	1p36	ENSG00000065526	23013	spen family transcriptional repressor	Lawrence
SPOP	protein_coding	17	17q21.33	ENSG00000121067	8405	speckle-type POZ protein	PanCancer,Lawrence
SRGAP3	protein_coding	3	3p25.3	ENSG00000196220	9901	SLIT-ROBO Rho GTPase activating protein 3	COSMIC
SRSF2	protein_coding	17	17q25.1	ENSG00000161547	6427	serine/arginine-rich splicing factor 2	Lawrence,COSMIC
SRSF3	protein_coding	6	6p21	ENSG00000112081	6428	serine/arginine-rich splicing factor 3	COSMIC
SS18	protein_coding	18	18q11.2	ENSG00000141380	6760	synovial sarcoma translocation, chromosome 18	COSMIC
SS18L1	protein_coding	20	20q13.3	ENSG00000184402	26039	synovial sarcoma translocation gene on chromosome 18-like 1	COSMIC
SSX1	protein_coding	X	Xp11.23	ENSG00000126752	6756	synovial sarcoma, X breakpoint 1	COSMIC
SSX2	protein_coding	X	Xp11.22	ENSG00000241476	6757	synovial sarcoma, X breakpoint 2	COSMIC
SSX4	protein_coding	X	Xp11.23	ENSG00000204645	6759	synovial sarcoma, X breakpoint 4	COSMIC
STAG2	protein_coding	X	Xq25	ENSG00000101972	10735	stromal antigen 2	PanCancer,Lawrence
STAT3	protein_coding	17	17q21.31	ENSG00000168610	6774	signal transducer and activator of transcription 3 (acute-phase response factor)	COSMIC
STAT5B	protein_coding	17	17q11.2	ENSG00000173757	6777	signal transducer and activator of transcription 5B	COSMIC
STIL	protein_coding	1	1p32	ENSG00000123473	6491	SCL/TAL1 interrupting locus	COSMIC
STK11	protein_coding	19	19p13.3	ENSG00000118046	6794	serine/threonine kinase 11	PanCancer,Lawrence,COSMIC
STK19	protein_coding	6	6p21.3	ENSG00000204344	8859	serine/threonine kinase 19	Lawrence
STX2	protein_coding	12	12q24.33	ENSG00000111450	2054	syntaxin 2	Lawrence
SUFU	protein_coding	10	10q24.32	ENSG00000107882	51684	suppressor of fused homolog (Drosophila)	COSMIC
SUZ12	protein_coding	17	17q11.2	ENSG00000178691	23512	SUZ12 polycomb repressive complex 2 subunit	COSMIC
SYK	protein_coding	9	9q22	ENSG00000165025	6850	spleen tyrosine kinase	COSMIC
TAF1	protein_coding	X	Xq13.1	ENSG00000147133	6872	TAF1 RNA polymerase II, TATA box binding protein (TBP)-associated factor, 250kDa	PanCancer
TAF15	protein_coding	17	17q11.1-q11.2	ENSG00000172660	8148	TAF15 RNA polymerase II, TATA box binding protein (TBP)-associated factor, 68kDa	COSMIC
SYMBOL	BIOTYPE	CHR	BAND	ENSEMBL	ENTREZ	DESCRIPTION	SOURCE
TAL1	protein_coding	1	1p32	ENSG00000162367	6886	T-cell acute lymphocytic leukemia 1	COSMIC
TAL2	protein_coding	9	9q32	ENSG00000186051	6887	T-cell acute lymphocytic leukemia 2	COSMIC
TAP1	protein_coding	6	6p21.3	ENSG00000168394	6890	transporter 1, ATP-binding cassette, sub-family B (MDR/TAP)	Lawrence
TBC1D12	protein_coding	10	10q23.33	ENSG00000108239	23232	TBC1 domain family, member 12	Lawrence
TBL1XR1	protein_coding	3	3q26.32	ENSG00000177565	79718	transducin (beta)-like 1 X-linked receptor 1	PanCancer,Lawrence,COSMIC
TBX3	protein_coding	12	12q24.21	ENSG00000135111	6926	T-box 3	PanCancer,Lawrence
TCEA1	protein_coding	8	8q11.2	ENSG00000187735	6917	transcription elongation factor A (SII), 1	COSMIC
TCEB1	protein_coding	8	8q21.11	ENSG00000154582	6921	transcription elongation factor B (SIII), polypeptide 1 (15kDa, elongin C)	Lawrence
TCF12	protein_coding	15	15q21	ENSG00000140262	6938	transcription factor 12	COSMIC
TCF3	protein_coding	19	19p13.3	ENSG00000071564	6929	transcription factor 3	COSMIC
TCF7L2	protein_coding	10	10q25.3	ENSG00000148737	6934	transcription factor 7-like 2 (T-cell specific, HMG-box)	Lawrence,COSMIC
TCL1A	protein_coding	14	14q32.1	ENSG00000100721	8115	T-cell leukemia/lymphoma 1A	COSMIC
TCP11L2	protein_coding	12	12q23.3	ENSG00000166046	255394	t-complex 11, testis-specific-like 2	Lawrence
TDRD10	protein_coding	1	1q21.3	ENSG00000163239	126668	tudor domain containing 10	Lawrence
TERT	protein_coding	5	5p15.33	ENSG00000164362	7015	telomerase reverse transcriptase	COSMIC
TET1	protein_coding	10	10q21	ENSG00000138336	80312	tet methylcytosine dioxygenase 1	COSMIC
TET2	protein_coding	4	4q24	ENSG00000168769	54790	tet methylcytosine dioxygenase 2	PanCancer,Lawrence,COSMIC
TFE3	protein_coding	X	Xp11.22	ENSG00000068323	7030	transcription factor binding to IGHM enhancer 3	COSMIC
TFEB	protein_coding	6	6p21	ENSG00000112561	7942	transcription factor EB	COSMIC
TFG	protein_coding	3	3q12.2	ENSG00000114354	10342	TRK-fused gene	COSMIC
TFPT	protein_coding	19	19q13	ENSG00000105619	29844	TCF3 (E2A) fusion partner (in childhood Leukemia)	COSMIC
TFRC	protein_coding	3	3q29	ENSG00000072274	7037	transferrin receptor	COSMIC
TGFBR2	protein_coding	3	3p22	ENSG00000163513	7048	transforming growth factor, beta receptor II (70/80kDa)	PanCancer,Lawrence
THRAP3	protein_coding	1	1p34.3	ENSG00000054118	9967	thyroid hormone receptor associated protein 3	COSMIC
TIMM17A	protein_coding	1	1q32.1	ENSG00000134375	10440	translocase of inner mitochondrial membrane 17 homolog A (yeast)	Lawrence
TLR4	protein_coding	9	9q33.1	ENSG00000136869	7099	toll-like receptor 4	PanCancer
TLX1	protein_coding	10	10q24	ENSG00000107807	3195	T-cell leukemia homeobox 1	COSMIC
TLX3	protein_coding	5	5q35.1	ENSG00000164438	30012	T-cell leukemia homeobox 3	COSMIC
TMPRSS2	protein_coding	21	21q22.3	ENSG00000184012	7113	transmembrane protease, serine 2	COSMIC
TNF	protein_coding	6	6p21.3	ENSG00000232810	7124	tumor necrosis factor	Lawrence
TNFAIP3	protein_coding	6	6q23	ENSG00000118503	7128	tumor necrosis factor, alpha-induced protein 3	COSMIC
TNFRSF14	protein_coding	1	1p36.32	ENSG00000157873	8764	tumor necrosis factor receptor superfamily, member 14	Lawrence,COSMIC
TNFRSF17	protein_coding	16	16p13.1	ENSG00000048462	608	tumor necrosis factor receptor superfamily, member 17	COSMIC
TOP1	protein_coding	20	20q12-q13.1	ENSG00000198900	7150	topoisomerase (DNA) I	COSMIC
TP53	protein_coding	17	17p13.1	ENSG00000141510	7157	tumor protein p53	PanCancer,Lawrence,COSMIC
TP53BP1	protein_coding	15	15q15-q21	ENSG00000067369	7158	tumor protein p53 binding protein 1	Lawrence
TPM3	protein_coding	1	1q21.2	ENSG00000143549	7170	tropomyosin 3	COSMIC
TPM4	protein_coding	19	19p13.1	ENSG00000167460	7171	tropomyosin 4	COSMIC
TPR	protein_coding	1	1q25	ENSG00000047410	7175	translocated promoter region, nuclear basket protein	COSMIC
TPX2	protein_coding	20	20q11.2	ENSG00000088325	22974	TPX2, microtubule-associated	Lawrence
TRAF3	protein_coding	14	14q32.32	ENSG00000131323	7187	TNF receptor-associated factor 3	Lawrence
TRAF7	protein_coding	16	16p13.3	ENSG00000131653	84231	TNF receptor-associated factor 7, E3 ubiquitin protein ligase	COSMIC
TRIM23	protein_coding	5	5q12.3	ENSG00000113595	373	tripartite motif containing 23	Lawrence
TRIM24	protein_coding	7	7q32-q34	ENSG00000122779	8805	tripartite motif containing 24	COSMIC
TRIM27	protein_coding	6	6p22	ENSG00000204713	5987	tripartite motif containing 27	COSMIC
TRIM33	protein_coding	1	1p13.1	ENSG00000197323	51592	tripartite motif containing 33	COSMIC
TRIP11	protein_coding	14	14q31-q32	ENSG00000100815	9321	thyroid hormone receptor interactor 11	COSMIC
TSC1	protein_coding	9	9q34	ENSG00000165699	7248	tuberous sclerosis 1	Lawrence,COSMIC
TSC2	protein_coding	16	16p13.3	ENSG00000103197	7249	tuberous sclerosis 2	COSMIC
TSHR	protein_coding	14	14q31	ENSG00000165409	7253	thyroid stimulating hormone receptor	COSMIC
TSHZ2	protein_coding	20	20q13.2	ENSG00000182463	128553	teashirt zinc finger homeobox 2	PanCancer
TSHZ3	protein_coding	19	19q12	ENSG00000121297	57616	teashirt zinc finger homeobox 3	PanCancer
TTL	protein_coding	2	2q13	ENSG00000114999	150465	tubulin tyrosine ligase	COSMIC
TTLL9	protein_coding	20	20q11.21	ENSG00000131044	164395	tubulin tyrosine ligase-like family, member 9	Lawrence
TXNDC8	protein_coding	9	9q31.3	ENSG00000204193	255220	thioredoxin domain containing 8 (spermatozoa)	Lawrence
SYMBOL	BIOTYPE	CHR	BAND	ENSEMBL	ENTREZ	DESCRIPTION	SOURCE
U2AF1	protein_coding	21	21q22.3	ENSG00000160201	7307	U2 small nuclear RNA auxiliary factor 1	PanCancer,Lawrence,COSMIC
UBR5	protein_coding	8	8q22	ENSG00000104517	51366	ubiquitin protein ligase E3 component n-recognin 5	COSMIC
USP6	protein_coding	17	17p13	ENSG00000129204	9098	ubiquitin specific peptidase 6 (Tre-2 oncogene)	COSMIC
USP9X	protein_coding	X	Xp11.4	ENSG00000124486	8239	ubiquitin specific peptidase 9, X-linked	PanCancer
VEZF1	protein_coding	17	17q22	ENSG00000136451	7716	vascular endothelial zinc finger 1	PanCancer
VHL	protein_coding	3	3p25.3	ENSG00000134086	7428	von Hippel-Lindau tumor suppressor, E3 ubiquitin protein ligase	PanCancer,Lawrence,COSMIC
VTI1A	protein_coding	10	10q25.2	ENSG00000151532	143187	vesicle transport through interaction with t-SNAREs 1A	COSMIC
WAS	protein_coding	X	Xp11.4-p11.21	ENSG00000015285	7454	Wiskott-Aldrich syndrome	COSMIC
WASF3	protein_coding	13	13q12	ENSG00000132970	10810	WAS protein family, member 3	Lawrence
WHSC1	protein_coding	4	4p16.3	ENSG00000109685	7468	Wolf-Hirschhorn syndrome candidate 1	COSMIC
WHSC1L1	protein_coding	8	8p11.2	ENSG00000147548	54904	Wolf-Hirschhorn syndrome candidate 1-like 1	COSMIC
WIF1	protein_coding	12	12q14.3	ENSG00000156076	11197	WNT inhibitory factor 1	COSMIC
WRN	protein_coding	8	8p12	ENSG00000165392	7486	Werner syndrome, RecQ helicase-like	COSMIC
WT1	protein_coding	11	11p13	ENSG00000184937	7490	Wilms tumor 1	PanCancer,Lawrence,COSMIC
WWTR1	protein_coding	3	3q23-q24	ENSG00000018408	25937	WW domain containing transcription regulator 1	COSMIC
XIRP2	protein_coding	2	2q24.3	ENSG00000163092	129446	xin actin-binding repeat containing 2	Lawrence
XPA	protein_coding	9	9q22.3	ENSG00000136936	7507	xeroderma pigmentosum, complementation group A	COSMIC
XPC	protein_coding	3	3p25	ENSG00000154767	7508	xeroderma pigmentosum, complementation group C	COSMIC
XPO1	protein_coding	2	2p15	ENSG00000082898	7514	exportin 1 (CRM1 homolog, yeast)	Lawrence,COSMIC
YWHAE	protein_coding	17	17p13.3	ENSG00000108953	7531	tyrosine 3-monooxygenase/tryptophan 5-monooxygenase activation protein, epsilon	COSMIC
ZBTB16	protein_coding	11	11q23.1	ENSG00000109906	7704	zinc finger and BTB domain containing 16	COSMIC
ZFHX3	protein_coding	16	16q22.3	ENSG00000140836	463	zinc finger homeobox 3	Lawrence
ZMYM2	protein_coding	13	13q11-q12	ENSG00000121741	7750	zinc finger, MYM-type 2	COSMIC
ZNF180	protein_coding	19	19q13.2	ENSG00000167384	7733	zinc finger protein 180	Lawrence
ZNF331	protein_coding	19	19q13.42	ENSG00000130844	55422	zinc finger protein 331	COSMIC
ZNF384	protein_coding	12	12p12	ENSG00000126746	171017	zinc finger protein 384	COSMIC
ZNF471	protein_coding	19	19q13.43	ENSG00000196263	57573	zinc finger protein 471	Lawrence
ZNF483	protein_coding	9	9q31.3	ENSG00000173258	158399	zinc finger protein 483	Lawrence
ZNF521	protein_coding	18	18q11.2	ENSG00000198795	25925	zinc finger protein 521	COSMIC
ZNF620	protein_coding	3	3p22.1	ENSG00000177842	253639	zinc finger protein 620	Lawrence
ZNF750	protein_coding	17	17q25.3	ENSG00000141579	79755	zinc finger protein 750	Lawrence
ZRANB3	protein_coding	2	2q21.3	ENSG00000121988	84083	zinc finger, RAN-binding domain containing 3	Lawrence
ZRSR2	protein_coding	X	Xp22.1	ENSG00000169249	8233	zinc finger (CCCH type), RNA-binding motif and serine/arginine rich 2	COSMIC
HMGN2P46	pseudogene	15	15q21.1	ENSG00000179362	283651	high mobility group nucleosomal binding domain 2 pseudogene 46	COSMIC,ncRNA
HOTAIR	antisense	12	12q13.13	ENSG00000228630	100124700	HOX transcript antisense RNA	ncRNA
MALAT1	lincRNA	11	11q13.1	ENSG00000251562	378938	metastasis associated lung adenocarcinoma transcript 1 (non-protein coding)	PanCancer,ncRNA
TCL6	processed_transcript	14	14q32.1	ENSG00000187621	27004	T-cell leukemia/lymphoma 6 (non-protein coding)	COSMIC,ncRNA
TERC	lincRNA	3	3q26	ENSG00000270141	7012	telomerase RNA component	ncRNA
XIST	lincRNA	X	Xq13.2	ENSG00000229807	7503	X inactive specific transcript (non-protein coding)	ncRNA
MIR21	miRNA	17	17q23.1	ENSG00000199004	406991	microRNA 21	ncRNA
MIR129-1	miRNA	7	7q32.1	ENSG00000207705	406917	microRNA 129-1	ncRNA
MIR129-2	miRNA	11	11p11.2	ENSG00000199077	406918	microRNA 129-2	ncRNA
MIR139	miRNA	11	11q13.4	ENSG00000272036	406931	microRNA 139	ncRNA
MIR142	antisense	17	17q22	ENSG00000265206	406934	microRNA 142	PanCancer,ncRNA
U6	snRNA	1	1q32.1	ENSG00000272262		U6 spliceosomal RNA	snRNA
U6	snRNA	1	1q25.3	ENSG00000272292		U6 spliceosomal RNA	snRNA
U6	snRNA	6	6q14.1	ENSG00000272445		U6 spliceosomal RNA	snRNA
U6	snRNA	7	7q34	ENSG00000271932		U6 spliceosomal RNA	snRNA
U6	snRNA	7	7q33	ENSG00000272393		U6 spliceosomal RNA	snRNA
U6	snRNA	9	9q22.1	ENSG00000271923		U6 spliceosomal RNA	snRNA
U6	snRNA	10	10p14	ENSG00000272507		U6 spliceosomal RNA	snRNA
U6	snRNA	12	12q13.12	ENSG00000272028		U6 spliceosomal RNA	snRNA
U6	snRNA	14	14q32.2	ENSG00000272439		U6 spliceosomal RNA	snRNA
U6	snRNA	15	15q21.2	ENSG00000271819		U6 spliceosomal RNA	snRNA
U6	snRNA	15	15q21.2	ENSG00000272337		U6 spliceosomal RNA	snRNA
SYMBOL	BIOTYPE	CHR	BAND	ENSEMBL	ENTREZ	DESCRIPTION	SOURCE
HLA-C	protein_coding	6	6p21.3	ENSG00000204525	3107	major histocompatibility complex, class I, C	MHC
HLA-E	protein_coding	6	6p21.3	ENSG00000204592	3133	major histocompatibility complex, class I, E	MHC
HLA-F	protein_coding	6	6p21.3	ENSG00000204642	3134	major histocompatibility complex, class I, F	MHC
HLA-G	protein_coding	6	6p21.3	ENSG00000204632	3135	major histocompatibility complex, class I, G	MHC
HLA-DMA	protein_coding	6	6p21.3	ENSG00000204257	3108	major histocompatibility complex, class II, DM alpha	MHC
HLA-DMB	protein_coding	6	6p21.3	ENSG00000242574	3109	major histocompatibility complex, class II, DM beta	MHC
HLA-DOA	protein_coding	6	6p21.3	ENSG00000204252	3111	major histocompatibility complex, class II, DO alpha	MHC
HLA-DOB	protein_coding	6	6p21.3	ENSG00000241106	3112	major histocompatibility complex, class II, DO beta	MHC
HLA-DPA1	protein_coding	6	6p21.3	ENSG00000231389	3113	major histocompatibility complex, class II, DP alpha 1	MHC
HLA-DPB1	protein_coding	6	6p21.3	ENSG00000223865	3115	major histocompatibility complex, class II, DP beta 1	MHC
HLA-DQA1	protein_coding	6	6p21.3	ENSG00000196735	3117	major histocompatibility complex, class II, DQ alpha 1	MHC
HLA-DQA2	protein_coding	6	6p21.3	ENSG00000237541	3118	major histocompatibility complex, class II, DQ alpha 2	MHC
HLA-DQB1	protein_coding	6	6p21.3	ENSG00000179344	3119	major histocompatibility complex, class II, DQ beta 1	MHC
HLA-DQB2	protein_coding	6	6p21	ENSG00000232629	3120	major histocompatibility complex, class II, DQ beta 2	MHC
HLA-DRA	protein_coding	6	6p21.3	ENSG00000204287	3122	major histocompatibility complex, class II, DR alpha	MHC
HLA-DRB1	protein_coding	6	6p21.3	ENSG00000196126	3123	major histocompatibility complex, class II, DR beta 1	MHC
HLA-DRB5	protein_coding	6	6p21.3	ENSG00000198502	3127	major histocompatibility complex, class II, DR beta 5	MHC
