# Supplementary material for: Biological and therapeutic implications of multisector sequencing in newly diagnosed glioblastoma
Source: Oxford University Press journal article supplement (doi:10.1093/neuonc/nox232), 2017-12-13
Supplement: nox232_suppl_supplementary_table_s6.xls [file nox232_suppl_supplementary_table_s6.xls]

## Sheet: Sheet1
Table S6: Mutation context of all 1204 mutation in the hypermutant sector (S1) of tumor W016
Context	Count
A[C>A]A	2
A[C>A]C	1
A[C>A]G	1
A[C>A]T	1
C[C>A]A	2
C[C>A]C	2
C[C>A]G	0
C[C>A]T	0
G[C>A]A	1
G[C>A]C	1
G[C>A]G	0
G[C>A]T	1
T[C>A]A	1
T[C>A]C	2
T[C>A]G	1
T[C>A]T	0
A[C>G]A	2
A[C>G]C	0
A[C>G]G	0
A[C>G]T	1
C[C>G]A	0
C[C>G]C	1
C[C>G]G	0
C[C>G]T	2
G[C>G]A	1
G[C>G]C	0
G[C>G]G	0
G[C>G]T	2
T[C>G]A	0
T[C>G]C	3
T[C>G]G	0
T[C>G]T	1
A[C>T]A	11
A[C>T]C	13
A[C>T]G	29
A[C>T]T	12
C[C>T]A	18
C[C>T]C	6
C[C>T]G	84
C[C>T]T	7
G[C>T]A	4
G[C>T]C	4
G[C>T]G	26
G[C>T]T	10
T[C>T]A	237
T[C>T]C	111
T[C>T]G	404
T[C>T]T	181
A[T>A]A	1
A[T>A]C	0
A[T>A]G	0
A[T>A]T	0
C[T>A]A	0
C[T>A]C	0
C[T>A]G	0
C[T>A]T	0
G[T>A]A	0
G[T>A]C	0
G[T>A]G	0
G[T>A]T	0
T[T>A]A	0
T[T>A]C	0
T[T>A]G	0
T[T>A]T	0
A[T>C]A	1
A[T>C]C	3
A[T>C]G	1
A[T>C]T	0
C[T>C]A	0
C[T>C]C	3
C[T>C]G	1
C[T>C]T	0
G[T>C]A	1
G[T>C]C	0
G[T>C]G	2
G[T>C]T	1
T[T>C]A	1
T[T>C]C	0
T[T>C]G	0
T[T>C]T	0
A[T>G]A	0
A[T>G]C	0
A[T>G]G	1
A[T>G]T	0
C[T>G]A	0
C[T>G]C	0
C[T>G]G	0
C[T>G]T	0
G[T>G]A	0
G[T>G]C	1
G[T>G]G	0
G[T>G]T	0
T[T>G]A	0
T[T>G]C	1
T[T>G]G	0
T[T>G]T	0
