# Supplementary material for: Biological and therapeutic implications of multisector sequencing in newly diagnosed glioblastoma
Source: Oxford University Press journal article supplement (doi:10.1093/neuonc/nox232), 2017-12-13
Supplement: nox232_suppl_supplementary_table_s7.xlsx [file nox232_suppl_supplementary_table_s7.xlsx]

## Sheet: W016 DNA REPAIR GENES
Table S7: DNA-Damage Repair associated genes mutated in hypermutator W016
Gene ID	Ensembl Transcript ID	Amino acid change	cDNA change	Sector 1 (S1) VAF	Sector 2 (S2) VAF	Clonality
ALKBH3	ENST00000532962	p.P144L	c.431	13.95	0	subclonal
ALKBH3	ENST00000302708	p.R275W	c.823	18	0	subclonal
ATR	ENST00000350721	p.E2034K	c.6100	6.46	0	subclonal
ATR	ENST00000350721	p.E1765K	c.5293	3.67	0	subclonal
ATR	ENST00000350721	p.D1470N	c.4408	3.25	0	subclonal
ATR	ENST00000350721	p.E1326K	c.3976	3.12	0	subclonal
MLH3	ENST00000355774	p.E1166K	c.3496	8.82	0	subclonal
POLB	ENST00000265421	p.L11F	c.31	7.95	0	subclonal
SPO11	ENST00000371263	p.S158F	c.473	9.09	2.61	subclonal
