# Supplementary material for: Biological and therapeutic implications of multisector sequencing in newly diagnosed glioblastoma
Source: Oxford University Press journal article supplement (doi:10.1093/neuonc/nox232), 2017-12-13
Supplement: nox232_suppl_supplementary_table_s8.xlsx [file nox232_suppl_supplementary_table_s8.xlsx]

## Sheet: Sheet1
Table S8 : List of therapeutic gene variants and their sector-specific VAFs and inferred clonality for all tumors
Patient ID	GENE ID	ENSEMBL ID	Amino acid change	cDNA change	Sector 1 (S1) VAF	Sector 2 (S2) VAF	Sector 3 (S3) VAF	Sector 4(S4) VAF	Clonality
B42	AR	ENST00000374690	p.460in_frame_insG	c.1368_1369	8.46	9.41	N/A	N/A	subclonal
B42	EGFR	ENST00000275493	p.E320Q	c.958	7.44	0	N/A	N/A	subclonal
B42	F2	ENST00000311907	p.V526L	c.1576	20	41.07	N/A	N/A	clonal
B42	PSMC6	ENST00000445930	p.R237G	c.709	24	25.4	N/A	N/A	clonal
B42	PSMD4	ENST00000453615	e2+2	c.83+2	26.87	17.02	N/A	N/A	clonal
B42	PTEN	ENST00000371953	p.L112V	c.334	33.7	32.71	N/A	N/A	clonal
B58	BRCA1	ENST00000471181	p.D67E	c.201	3.49	0.23	N/A	N/A	subclonal
B58	MTOR	ENST00000361445	p.N382S	c.1145	3.28	0	N/A	N/A	subclonal
B58	PDGFRB	ENST00000520851	NULL	NULL	31.82	22.03	N/A	N/A	clonal
B58	TUBA8	ENST00000608634	p.R153*	c.457	11.11	0	N/A	N/A	subclonal
B65	PTEN	ENST00000371953	p.E7*	c.19	63.59	0	N/A	N/A	subclonal
B67	PIK3CA	ENST00000263967	p.E542K	c.1624	2.06	0.3	N/A	N/A	subclonal
B67	PIK3CG	ENST00000359195	p.E284K	c.850	2.69	0.29	N/A	N/A	subclonal
B67	PRKD1	ENST00000331968	p.32in_frame_insSG	c.97_96	33.33	33.33	N/A	N/A	clonal
B67	RPS6KA3	ENST00000379565	p.I219F	c.655	3.12	26.57	N/A	N/A	clonal
B67	RYR1	ENST00000359596	p.E3104K	c.9310	5.71	24.14	N/A	N/A	clonal
B71	KDR	ENST00000263923	p.R1022*	c.3064	21.05	37.5	N/A	N/A	clonal
B71	NOTCH4	ENST00000375023	p.P502L	c.1505	25.51	51.49	N/A	N/A	clonal
B72	EGFR	ENST00000275493	p.T363I	c.1088	55.88	0.31	N/A	N/A	subclonal
B74	KDR	ENST00000263923	p.R349T	c.1046	27.27	21.4	N/A	N/A	clonal
B74	NOTCH3	ENST00000263388	p.A818T	c.2452	38.24	25	N/A	N/A	clonal
W016	AKT1	ENST00000349310	p.R15Q	c.44	5.36	0.34	N/A	N/A	subclonal
W016	AKT2	ENST00000392038	p.D32N	c.94	9.2	0.9	N/A	N/A	subclonal
W016	AOX1	ENST00000374700	p.S347F	c.1040	14.63	0	N/A	N/A	subclonal
W016	AR	ENST00000374690	p.E289K	c.865	4.79	0	N/A	N/A	subclonal
W016	ATM	ENST00000278616	p.E376K	c.1126	4.46	1.36	N/A	N/A	subclonal
W016	ATR	ENST00000350721	p.E2034K	c.6100	6.46	0	N/A	N/A	subclonal
W016	BRCA1	ENST00000357654	p.G1581E	c.4742	3.91	0	N/A	N/A	subclonal
W016	BRCA2	ENST00000380152	p.A3122T	c.9364	4.22	0.21	N/A	N/A	subclonal
W016	CA1	ENST00000256119	p.E153K	c.457	10.94	0	N/A	N/A	subclonal
W016	CA7	ENST00000338437	p.P140S	c.418	12.96	0	N/A	N/A	subclonal
W016	CCND1	ENST00000227507	p.E252K	c.754	5.07	0.19	N/A	N/A	subclonal
W016	EGFR	ENST00000275493	p.A289V	c.866	38	51.41	N/A	N/A	clonal
W016	ERBB4	ENST00000342788	p.R782Q	c.2345	5.97	0	N/A	N/A	subclonal
W016	FGFR2	ENST00000358487	p.D304N	c.910	5.39	0.24	N/A	N/A	subclonal
W016	FGFR3	ENST00000340107	p.E135K	c.403	4.02	0	N/A	N/A	subclonal
W016	FLT3	ENST00000380982	p.E266K	c.796	2.7	0.13	N/A	N/A	subclonal
W016	GRIA1	ENST00000448073	p.R136C	c.406	12.7	0	N/A	N/A	subclonal
W016	GRIA2	ENST00000264426	p.S424F	c.1271	12.99	0	N/A	N/A	subclonal
W016	HSP90AB1	ENST00000353801	p.Q18*	c.52	7.96	0.76	N/A	N/A	subclonal
W016	IPO4	ENST00000354464	p.L721V	c.2161	47.06	51.85	N/A	N/A	clonal
W016	KIT	ENST00000288135	e3+1	e3+1	6.17	0.27	N/A	N/A	subclonal
W016	KRAS	ENST00000311936	p.E162K	c.484	2.74	0	N/A	N/A	subclonal
W016	LDLR	ENST00000558518	p.E31G	c.92	26.47	27.27	N/A	N/A	clonal
W016	MAP2	ENST00000360351	p.P1517S	c.4549	10.71	0	N/A	N/A	subclonal
W016	MAP4	ENST00000360240	p.D778N	c.2332	27.27	0	N/A	N/A	subclonal
W016	MMP8	ENST00000236826	p.E199K	c.595	7.74	0	N/A	N/A	subclonal
W016	MTOR	ENST00000361445	p.R106K	c.317	4.78	0	N/A	N/A	subclonal
W016	NF1	ENST00000358273	p.E258K	c.772	4.51	0.25	N/A	N/A	subclonal
W016	NOTCH1	ENST00000277541	p.G2126R	c.6376	4.92	0.21	N/A	N/A	subclonal
W016	PDGFRA	ENST00000257290	p.D366N	c.1096	3.27	0.22	N/A	N/A	subclonal
W016	PDHA1	ENST00000379806	p.R126C	c.376	7.14	0	N/A	N/A	subclonal
W016	PIK3C2A	ENST00000265970	p.E1303K	c.3907	6.17	0	N/A	N/A	subclonal
W016	PIK3C2A	ENST00000265970	p.D1191N	c.3571	5.95	0	N/A	N/A	subclonal
W016	PIK3C2B	ENST00000367187	p.R260Q	c.779	10	0	N/A	N/A	subclonal
W016	PIK3C3	ENST00000262039	p.S282F	c.845	3.2	0.21	N/A	N/A	subclonal
W016	PIK3CA	ENST00000263967	p.E503K	c.1507	2.79	0	N/A	N/A	subclonal
W016	PIK3CG	ENST00000359195	p.R18Q	c.53	6.37	0.15	N/A	N/A	subclonal
W016	PIK3R1	ENST00000396611	p.L264fs	c.789_798	27.73	27.31	N/A	N/A	clonal
W016	POLB	ENST00000265421	p.L11F	c.31	7.95	0	N/A	N/A	subclonal
W016	PSMC3	ENST00000530887	p.G8E	c.23	20.83	0	N/A	N/A	subclonal
W016	PSMD10	ENST00000217958	p.V56F	c.166	34.72	32.34	N/A	N/A	clonal
W016	VEGFC	ENST00000280193	p.E47K	c.139	9.68	0	N/A	N/A	subclonal
W059	PARP1	ENST00000366794	p.T258A	c.772	25	1.53	N/A	N/A	subclonal
W059	PIK3CA	ENST00000263967	p.P471L	c.1412	47.37	47.28	N/A	N/A	clonal
W059	TUBA3C	ENST00000400113	p.R156W	c.466	52.56	59.84	N/A	N/A	clonal
B103	ABCB1	ENST00000265724	p.G382R	c.1144	23.28	21.95	21.9	27.27	clonal
B103	EGFR	ENST00000275493	p.M567I	c.1701	26.96	0.15	0	0	subclonal
B103	FLT1	ENST00000282397	p.G373E	c.1118	53.33	35	42.86	29.17	clonal
B103	FLT4	ENST00000261937	p.A1158V	c.3473	35.48	52.94	26.19	33.33	clonal
