# Supplementary material for: Biological and therapeutic implications of multisector sequencing in newly diagnosed glioblastoma
Source: Oxford University Press journal article supplement (doi:10.1093/neuonc/nox232), 2017-12-13
Supplement: nox232_suppl_supplementary_table_s9.xlsx [file nox232_suppl_supplementary_table_s9.xlsx]

## Sheet: Sheet1
Table S9: Comprehensive list of mutated genes with potential therapeutic implications and the corresponding interacting drugs for all patients
Patient ID	GENE	Drug	Drug action	Source	Description
B42	AR	ARN-509	n/a	TdgClinicalTrial	clinically actionable,druggable genome,nuclear hormone receptor,transcription factor binding
B42	AR	BICALUTAMIDE	n/a	TEND	clinically actionable,druggable genome,nuclear hormone receptor,transcription factor binding
B42	AR	BICALUTAMIDE	n/a	TdgClinicalTrial	clinically actionable,druggable genome,nuclear hormone receptor,transcription factor binding
B42	AR	DROMOSTANOLONE	n/a	TEND	clinically actionable,druggable genome,nuclear hormone receptor,transcription factor binding
B42	AR	ENZALUTAMIDE	inhibitor	CancerCommons	clinically actionable,druggable genome,nuclear hormone receptor,transcription factor binding
B42	AR	ENZALUTAMIDE	inhibitor	DrugBank	clinically actionable,druggable genome,nuclear hormone receptor,transcription factor binding
B42	AR	FLUTAMIDE	antagonist	DrugBank	clinically actionable,druggable genome,nuclear hormone receptor,transcription factor binding
B42	AR	FLUTAMIDE	n/a	TEND	clinically actionable,druggable genome,nuclear hormone receptor,transcription factor binding
B42	AR	GALETERONE	n/a	TdgClinicalTrial	clinically actionable,druggable genome,nuclear hormone receptor,transcription factor binding
B42	AR	METHYLTESTOSTERONE	agonist	DrugBank	clinically actionable,druggable genome,nuclear hormone receptor,transcription factor binding
B42	AR	NILUTAMIDE	antagonist	DrugBank	clinically actionable,druggable genome,nuclear hormone receptor,transcription factor binding
B42	AR	NILUTAMIDE	n/a	TEND	clinically actionable,druggable genome,nuclear hormone receptor,transcription factor binding
B42	EGFR	AEE 788	inhibitor	TALC	cell surface,clinically actionable,druggable genome,kinase,serine threonine kinase,tumor suppressor,tyrosine kinase
B42	EGFR	AFATINIB	inhibitor	MyCancerGenome	cell surface,clinically actionable,druggable genome,kinase,serine threonine kinase,tumor suppressor,tyrosine kinase
B42	EGFR	AFATINIB	inhibitor	MyCancerGenomeClinicalTrial	cell surface,clinically actionable,druggable genome,kinase,serine threonine kinase,tumor suppressor,tyrosine kinase
B42	EGFR	AFATINIB	inhibitor	TALC	cell surface,clinically actionable,druggable genome,kinase,serine threonine kinase,tumor suppressor,tyrosine kinase
B42	EGFR	AFATINIB	n/a	TdgClinicalTrial	cell surface,clinically actionable,druggable genome,kinase,serine threonine kinase,tumor suppressor,tyrosine kinase
B42	EGFR	AKOS004227608	n/a	ClearityFoundationClinicalTrial	cell surface,clinically actionable,druggable genome,kinase,serine threonine kinase,tumor suppressor,tyrosine kinase
B42	EGFR	AP26113	inhibitor	MyCancerGenomeClinicalTrial	cell surface,clinically actionable,druggable genome,kinase,serine threonine kinase,tumor suppressor,tyrosine kinase
B42	EGFR	AZD8931	inhibitor	MyCancerGenome	cell surface,clinically actionable,druggable genome,kinase,serine threonine kinase,tumor suppressor,tyrosine kinase
B42	EGFR	BMS-599626	inhibitor	MyCancerGenome	cell surface,clinically actionable,druggable genome,kinase,serine threonine kinase,tumor suppressor,tyrosine kinase
B42	EGFR	BMS-599626	inhibitor	TALC	cell surface,clinically actionable,druggable genome,kinase,serine threonine kinase,tumor suppressor,tyrosine kinase
B42	EGFR	BMS-690514	inhibitor	TALC	cell surface,clinically actionable,druggable genome,kinase,serine threonine kinase,tumor suppressor,tyrosine kinase
B42	EGFR	CO-1686	inhibitor	MyCancerGenome	cell surface,clinically actionable,druggable genome,kinase,serine threonine kinase,tumor suppressor,tyrosine kinase
B42	EGFR	CUDC-101	inhibitor	TALC	cell surface,clinically actionable,druggable genome,kinase,serine threonine kinase,tumor suppressor,tyrosine kinase
B42	EGFR	CUDC-101	n/a	TdgClinicalTrial	cell surface,clinically actionable,druggable genome,kinase,serine threonine kinase,tumor suppressor,tyrosine kinase
B42	EGFR	DACOMITINIB	inhibitor	MyCancerGenome	cell surface,clinically actionable,druggable genome,kinase,serine threonine kinase,tumor suppressor,tyrosine kinase
B42	EGFR	DACOMITINIB	inhibitor	MyCancerGenomeClinicalTrial	cell surface,clinically actionable,druggable genome,kinase,serine threonine kinase,tumor suppressor,tyrosine kinase
B42	EGFR	DACOMITINIB	inhibitor	TALC	cell surface,clinically actionable,druggable genome,kinase,serine threonine kinase,tumor suppressor,tyrosine kinase
B42	EGFR	DACOMITINIB	n/a	TdgClinicalTrial	cell surface,clinically actionable,druggable genome,kinase,serine threonine kinase,tumor suppressor,tyrosine kinase
B42	EGFR	ERLOTINIB	inhibitor	CancerCommons	cell surface,clinically actionable,druggable genome,kinase,serine threonine kinase,tumor suppressor,tyrosine kinase
B42	EGFR	ERLOTINIB	inhibitor	MyCancerGenome	cell surface,clinically actionable,druggable genome,kinase,serine threonine kinase,tumor suppressor,tyrosine kinase
B42	EGFR	ERLOTINIB	inhibitor	TALC	cell surface,clinically actionable,druggable genome,kinase,serine threonine kinase,tumor suppressor,tyrosine kinase
B42	EGFR	ERLOTINIB	n/a	ClearityFoundationBiomarkers	cell surface,clinically actionable,druggable genome,kinase,serine threonine kinase,tumor suppressor,tyrosine kinase
B42	EGFR	ERLOTINIB	n/a	ClearityFoundationClinicalTrial	cell surface,clinically actionable,druggable genome,kinase,serine threonine kinase,tumor suppressor,tyrosine kinase
B42	EGFR	ERLOTINIB	n/a	TEND	cell surface,clinically actionable,druggable genome,kinase,serine threonine kinase,tumor suppressor,tyrosine kinase
B42	EGFR	ERLOTINIB	n/a	TdgClinicalTrial	cell surface,clinically actionable,druggable genome,kinase,serine threonine kinase,tumor suppressor,tyrosine kinase
B42	EGFR	ERLOTINIB HYDROCHLORIDE	inhibitor	MyCancerGenomeClinicalTrial	cell surface,clinically actionable,druggable genome,kinase,serine threonine kinase,tumor suppressor,tyrosine kinase
B42	EGFR	GEFITINIB	inhibitor	MyCancerGenome	cell surface,clinically actionable,druggable genome,kinase,serine threonine kinase,tumor suppressor,tyrosine kinase
B42	EGFR	GEFITINIB	inhibitor	MyCancerGenomeClinicalTrial	cell surface,clinically actionable,druggable genome,kinase,serine threonine kinase,tumor suppressor,tyrosine kinase
B42	EGFR	GEFITINIB	inhibitor	TALC	cell surface,clinically actionable,druggable genome,kinase,serine threonine kinase,tumor suppressor,tyrosine kinase
B42	EGFR	GEFITINIB	n/a	ClearityFoundationBiomarkers	cell surface,clinically actionable,druggable genome,kinase,serine threonine kinase,tumor suppressor,tyrosine kinase
B42	EGFR	GEFITINIB	n/a	TEND	cell surface,clinically actionable,druggable genome,kinase,serine threonine kinase,tumor suppressor,tyrosine kinase
B42	EGFR	GEFITINIB	n/a	TdgClinicalTrial	cell surface,clinically actionable,druggable genome,kinase,serine threonine kinase,tumor suppressor,tyrosine kinase
B42	EGFR	ICOTINIB	inhibitor	MyCancerGenome	cell surface,clinically actionable,druggable genome,kinase,serine threonine kinase,tumor suppressor,tyrosine kinase
B42	EGFR	ICOTINIB	inhibitor	MyCancerGenomeClinicalTrial	cell surface,clinically actionable,druggable genome,kinase,serine threonine kinase,tumor suppressor,tyrosine kinase
B42	EGFR	ICOTINIB	inhibitor	TALC	cell surface,clinically actionable,druggable genome,kinase,serine threonine kinase,tumor suppressor,tyrosine kinase
B42	EGFR	LAPATINIB	inhibitor	CancerCommons	cell surface,clinically actionable,druggable genome,kinase,serine threonine kinase,tumor suppressor,tyrosine kinase
B42	EGFR	LAPATINIB	n/a	ClearityFoundationClinicalTrial	cell surface,clinically actionable,druggable genome,kinase,serine threonine kinase,tumor suppressor,tyrosine kinase
B42	EGFR	LAPATINIB	n/a	TEND	cell surface,clinically actionable,druggable genome,kinase,serine threonine kinase,tumor suppressor,tyrosine kinase
B42	EGFR	LAPATINIB	n/a	TdgClinicalTrial	cell surface,clinically actionable,druggable genome,kinase,serine threonine kinase,tumor suppressor,tyrosine kinase
B42	EGFR	LAPATINIB DITOSYLATE	inhibitor	MyCancerGenomeClinicalTrial	cell surface,clinically actionable,druggable genome,kinase,serine threonine kinase,tumor suppressor,tyrosine kinase
B42	EGFR	MOMELOTINIB	inhibitor	TALC	cell surface,clinically actionable,druggable genome,kinase,serine threonine kinase,tumor suppressor,tyrosine kinase
B42	EGFR	NERATINIB	inhibitor	TALC	cell surface,clinically actionable,druggable genome,kinase,serine threonine kinase,tumor suppressor,tyrosine kinase
B42	EGFR	NERATINIB	n/a	TdgClinicalTrial	cell surface,clinically actionable,druggable genome,kinase,serine threonine kinase,tumor suppressor,tyrosine kinase
B42	EGFR	PELITINIB	inhibitor	MyCancerGenome	cell surface,clinically actionable,druggable genome,kinase,serine threonine kinase,tumor suppressor,tyrosine kinase
B42	EGFR	PELITINIB	inhibitor	TALC	cell surface,clinically actionable,druggable genome,kinase,serine threonine kinase,tumor suppressor,tyrosine kinase
B42	EGFR	POZIOTINIB	inhibitor	MyCancerGenomeClinicalTrial	cell surface,clinically actionable,druggable genome,kinase,serine threonine kinase,tumor suppressor,tyrosine kinase
B42	EGFR	VANDETANIB	inhibitor	MyCancerGenome	cell surface,clinically actionable,druggable genome,kinase,serine threonine kinase,tumor suppressor,tyrosine kinase
B42	EGFR	VANDETANIB	inhibitor	MyCancerGenomeClinicalTrial	cell surface,clinically actionable,druggable genome,kinase,serine threonine kinase,tumor suppressor,tyrosine kinase
B42	EGFR	VANDETANIB	inhibitor	TALC	cell surface,clinically actionable,druggable genome,kinase,serine threonine kinase,tumor suppressor,tyrosine kinase
B42	EGFR	VANDETANIB	n/a	ClearityFoundationBiomarkers	cell surface,clinically actionable,druggable genome,kinase,serine threonine kinase,tumor suppressor,tyrosine kinase
B42	EGFR	VANDETANIB	n/a	ClearityFoundationClinicalTrial	cell surface,clinically actionable,druggable genome,kinase,serine threonine kinase,tumor suppressor,tyrosine kinase
B42	EGFR	VANDETANIB	n/a	TdgClinicalTrial	cell surface,clinically actionable,druggable genome,kinase,serine threonine kinase,tumor suppressor,tyrosine kinase
B42	F2	SURAMIN	inhibitor	DrugBank	druggable genome,growth factor,protease
B42	PSMC6	BORTEZOMIB	other/unknown	MyCancerGenome	transcription factor binding,tumor suppressor
B42	PSMC6	CARFILZOMIB	other/unknown	MyCancerGenome	transcription factor binding,tumor suppressor
B42	PSMD4	BORTEZOMIB	other/unknown	MyCancerGenome	transcription factor binding,tumor suppressor
B42	PSMD4	CARFILZOMIB	other/unknown	MyCancerGenome	transcription factor binding,tumor suppressor
B42	PTEN	1372540-25-4	inhibitor	MyCancerGenomeClinicalTrial	clinically actionable,drug resistance,druggable genome,protein phosphatase,pten family,tumor suppressor
B42	PTEN	ERLOTINIB	n/a	ClearityFoundationBiomarkers	clinically actionable,drug resistance,druggable genome,protein phosphatase,pten family,tumor suppressor
B42	PTEN	EVEROLIMUS	n/a	ClearityFoundationBiomarkers	clinically actionable,drug resistance,druggable genome,protein phosphatase,pten family,tumor suppressor
B42	PTEN	GEFITINIB	n/a	ClearityFoundationBiomarkers	clinically actionable,drug resistance,druggable genome,protein phosphatase,pten family,tumor suppressor
B42	PTEN	GSK2126458	n/a	ClearityFoundationBiomarkers	clinically actionable,drug resistance,druggable genome,protein phosphatase,pten family,tumor suppressor
B42	PTEN	PF-04691502	n/a	ClearityFoundationBiomarkers	clinically actionable,drug resistance,druggable genome,protein phosphatase,pten family,tumor suppressor
B42	PTEN	TEMSIROLIMUS	n/a	ClearityFoundationBiomarkers	clinically actionable,drug resistance,druggable genome,protein phosphatase,pten family,tumor suppressor
B42	PTEN	VANDETANIB	n/a	ClearityFoundationBiomarkers	clinically actionable,drug resistance,druggable genome,protein phosphatase,pten family,tumor suppressor
B42	PTEN	XL765	n/a	ClearityFoundationBiomarkers	clinically actionable,drug resistance,druggable genome,protein phosphatase,pten family,tumor suppressor
B42	PTEN	ZSTK474	n/a	ClearityFoundationBiomarkers	clinically actionable,drug resistance,druggable genome,protein phosphatase,pten family,tumor suppressor
B58	BRCA1	BMN673	n/a	ClearityFoundationBiomarkers	clinically actionable,dna repair,tumor suppressor
B58	BRCA1	CARBOPLATIN	n/a	ClearityFoundationBiomarkers	clinically actionable,dna repair,tumor suppressor
B58	BRCA1	OLAPARIB	n/a	ClearityFoundationBiomarkers	clinically actionable,dna repair,tumor suppressor
B58	BRCA1	RUCAPARIB	n/a	ClearityFoundationBiomarkers	clinically actionable,dna repair,tumor suppressor
B58	BRCA1	VELIPARIB	n/a	ClearityFoundationBiomarkers	clinically actionable,dna repair,tumor suppressor
B58	MTOR	AZD8055	inhibitor	MyCancerGenome	clinically actionable,dna repair,druggable genome,kinase,phosphatidylinositol 3 kinase,serine threonine kinase,transcription factor binding,tumor suppressor
B58	MTOR	DEFOROLIMUS	n/a	ClearityFoundationClinicalTrial	clinically actionable,dna repair,druggable genome,kinase,phosphatidylinositol 3 kinase,serine threonine kinase,transcription factor binding,tumor suppressor
B58	MTOR	GDC-0980	inhibitor	MyCancerGenome	clinically actionable,dna repair,druggable genome,kinase,phosphatidylinositol 3 kinase,serine threonine kinase,transcription factor binding,tumor suppressor
B58	MTOR	METFORMIN	inhibitor	MyCancerGenomeClinicalTrial	clinically actionable,dna repair,druggable genome,kinase,phosphatidylinositol 3 kinase,serine threonine kinase,transcription factor binding,tumor suppressor
B58	MTOR	NVP-BGT226	inhibitor	TALC	clinically actionable,dna repair,druggable genome,kinase,phosphatidylinositol 3 kinase,serine threonine kinase,transcription factor binding,tumor suppressor
B58	MTOR	OSI-027	inhibitor	MyCancerGenome	clinically actionable,dna repair,druggable genome,kinase,phosphatidylinositol 3 kinase,serine threonine kinase,transcription factor binding,tumor suppressor
B58	MTOR	OSI-027	n/a	TdgClinicalTrial	clinically actionable,dna repair,druggable genome,kinase,phosphatidylinositol 3 kinase,serine threonine kinase,transcription factor binding,tumor suppressor
B58	MTOR	PI-103	inhibitor	MyCancerGenome	clinically actionable,dna repair,druggable genome,kinase,phosphatidylinositol 3 kinase,serine threonine kinase,transcription factor binding,tumor suppressor
B58	MTOR	PKI-587	inhibitor	MyCancerGenome	clinically actionable,dna repair,druggable genome,kinase,phosphatidylinositol 3 kinase,serine threonine kinase,transcription factor binding,tumor suppressor
B58	MTOR	PKI-587	inhibitor	MyCancerGenomeClinicalTrial	clinically actionable,dna repair,druggable genome,kinase,phosphatidylinositol 3 kinase,serine threonine kinase,transcription factor binding,tumor suppressor
B58	MTOR	RIDAFOROLIMUS	inhibitor	TALC	clinically actionable,dna repair,druggable genome,kinase,phosphatidylinositol 3 kinase,serine threonine kinase,transcription factor binding,tumor suppressor
B58	MTOR	RIDAFOROLIMUS	n/a	TdgClinicalTrial	clinically actionable,dna repair,druggable genome,kinase,phosphatidylinositol 3 kinase,serine threonine kinase,transcription factor binding,tumor suppressor
B58	MTOR	SF1126	inhibitor	MyCancerGenome	clinically actionable,dna repair,druggable genome,kinase,phosphatidylinositol 3 kinase,serine threonine kinase,transcription factor binding,tumor suppressor
B58	MTOR	SF1126	n/a	DrugBank	clinically actionable,dna repair,druggable genome,kinase,phosphatidylinositol 3 kinase,serine threonine kinase,transcription factor binding,tumor suppressor
B58	MTOR	SF1126	n/a	TdgClinicalTrial	clinically actionable,dna repair,druggable genome,kinase,phosphatidylinositol 3 kinase,serine threonine kinase,transcription factor binding,tumor suppressor
B58	MTOR	SIROLIMUS	inhibitor	DrugBank	clinically actionable,dna repair,druggable genome,kinase,phosphatidylinositol 3 kinase,serine threonine kinase,transcription factor binding,tumor suppressor
B58	MTOR	SIROLIMUS	n/a	ClearityFoundationClinicalTrial	clinically actionable,dna repair,druggable genome,kinase,phosphatidylinositol 3 kinase,serine threonine kinase,transcription factor binding,tumor suppressor
B58	MTOR	TEMSIROLIMUS	inhibitor	CancerCommons	clinically actionable,dna repair,druggable genome,kinase,phosphatidylinositol 3 kinase,serine threonine kinase,transcription factor binding,tumor suppressor
B58	MTOR	TEMSIROLIMUS	inhibitor	MyCancerGenome	clinically actionable,dna repair,druggable genome,kinase,phosphatidylinositol 3 kinase,serine threonine kinase,transcription factor binding,tumor suppressor
B58	MTOR	TEMSIROLIMUS	inhibitor	MyCancerGenomeClinicalTrial	clinically actionable,dna repair,druggable genome,kinase,phosphatidylinositol 3 kinase,serine threonine kinase,transcription factor binding,tumor suppressor
B58	MTOR	TEMSIROLIMUS	n/a	ClearityFoundationClinicalTrial	clinically actionable,dna repair,druggable genome,kinase,phosphatidylinositol 3 kinase,serine threonine kinase,transcription factor binding,tumor suppressor
B58	MTOR	TEMSIROLIMUS	n/a	TEND	clinically actionable,dna repair,druggable genome,kinase,phosphatidylinositol 3 kinase,serine threonine kinase,transcription factor binding,tumor suppressor
B58	MTOR	TEMSIROLIMUS	n/a	TdgClinicalTrial	clinically actionable,dna repair,druggable genome,kinase,phosphatidylinositol 3 kinase,serine threonine kinase,transcription factor binding,tumor suppressor
B58	MTOR	XL765	inhibitor	CancerCommons	clinically actionable,dna repair,druggable genome,kinase,phosphatidylinositol 3 kinase,serine threonine kinase,transcription factor binding,tumor suppressor
B58	MTOR	XL765	inhibitor	TALC	clinically actionable,dna repair,druggable genome,kinase,phosphatidylinositol 3 kinase,serine threonine kinase,transcription factor binding,tumor suppressor
B58	MTOR	XL765	n/a	DrugBank	clinically actionable,dna repair,druggable genome,kinase,phosphatidylinositol 3 kinase,serine threonine kinase,transcription factor binding,tumor suppressor
B58	MTOR	XL765	n/a	TdgClinicalTrial	clinically actionable,dna repair,druggable genome,kinase,phosphatidylinositol 3 kinase,serine threonine kinase,transcription factor binding,tumor suppressor
B58	PDGFRB	AMUVATINIB	inhibitor	TALC	cell surface,clinically actionable,druggable genome,g protein coupled receptor,kinase,tumor suppressor,tyrosine kinase
B58	PDGFRB	AMUVATINIB	n/a	TdgClinicalTrial	cell surface,clinically actionable,druggable genome,g protein coupled receptor,kinase,tumor suppressor,tyrosine kinase
B58	PDGFRB	AXITINIB	inhibitor	MyCancerGenome	cell surface,clinically actionable,druggable genome,g protein coupled receptor,kinase,tumor suppressor,tyrosine kinase
B58	PDGFRB	AXITINIB	inhibitor	TALC	cell surface,clinically actionable,druggable genome,g protein coupled receptor,kinase,tumor suppressor,tyrosine kinase
B58	PDGFRB	AXITINIB	n/a	TdgClinicalTrial	cell surface,clinically actionable,druggable genome,g protein coupled receptor,kinase,tumor suppressor,tyrosine kinase
B58	PDGFRB	CEDIRANIB	inhibitor	TALC	cell surface,clinically actionable,druggable genome,g protein coupled receptor,kinase,tumor suppressor,tyrosine kinase
B58	PDGFRB	DASATINIB	inhibitor	MyCancerGenomeClinicalTrial	cell surface,clinically actionable,druggable genome,g protein coupled receptor,kinase,tumor suppressor,tyrosine kinase
B58	PDGFRB	DASATINIB	inhibitor	TALC	cell surface,clinically actionable,druggable genome,g protein coupled receptor,kinase,tumor suppressor,tyrosine kinase
B58	PDGFRB	DASATINIB	n/a	TEND	cell surface,clinically actionable,druggable genome,g protein coupled receptor,kinase,tumor suppressor,tyrosine kinase
B58	PDGFRB	DASATINIB	n/a	TdgClinicalTrial	cell surface,clinically actionable,druggable genome,g protein coupled receptor,kinase,tumor suppressor,tyrosine kinase
B58	PDGFRB	DOVITINIB	inhibitor	TALC	cell surface,clinically actionable,druggable genome,g protein coupled receptor,kinase,tumor suppressor,tyrosine kinase
B58	PDGFRB	DOVITINIB	n/a	ClearityFoundationClinicalTrial	cell surface,clinically actionable,druggable genome,g protein coupled receptor,kinase,tumor suppressor,tyrosine kinase
B58	PDGFRB	DOVITINIB	n/a	TdgClinicalTrial	cell surface,clinically actionable,druggable genome,g protein coupled receptor,kinase,tumor suppressor,tyrosine kinase
B58	PDGFRB	IMATINIB	antagonist	DrugBank	cell surface,clinically actionable,druggable genome,g protein coupled receptor,kinase,tumor suppressor,tyrosine kinase
B58	PDGFRB	IMATINIB	inhibitor	TALC	cell surface,clinically actionable,druggable genome,g protein coupled receptor,kinase,tumor suppressor,tyrosine kinase
B58	PDGFRB	IMATINIB	n/a	TEND	cell surface,clinically actionable,druggable genome,g protein coupled receptor,kinase,tumor suppressor,tyrosine kinase
B58	PDGFRB	IMATINIB	n/a	TdgClinicalTrial	cell surface,clinically actionable,druggable genome,g protein coupled receptor,kinase,tumor suppressor,tyrosine kinase
B58	PDGFRB	LENVATINIB	n/a	TdgClinicalTrial	cell surface,clinically actionable,druggable genome,g protein coupled receptor,kinase,tumor suppressor,tyrosine kinase
B58	PDGFRB	LINIFANIB	inhibitor	MyCancerGenome	cell surface,clinically actionable,druggable genome,g protein coupled receptor,kinase,tumor suppressor,tyrosine kinase
B58	PDGFRB	LINIFANIB	inhibitor	TALC	cell surface,clinically actionable,druggable genome,g protein coupled receptor,kinase,tumor suppressor,tyrosine kinase
B58	PDGFRB	LINIFANIB	n/a	TdgClinicalTrial	cell surface,clinically actionable,druggable genome,g protein coupled receptor,kinase,tumor suppressor,tyrosine kinase
B58	PDGFRB	MASITINIB	inhibitor	MyCancerGenomeClinicalTrial	cell surface,clinically actionable,druggable genome,g protein coupled receptor,kinase,tumor suppressor,tyrosine kinase
B58	PDGFRB	MOTESANIB	inhibitor	MyCancerGenome	cell surface,clinically actionable,druggable genome,g protein coupled receptor,kinase,tumor suppressor,tyrosine kinase
B58	PDGFRB	MOTESANIB	inhibitor	TALC	cell surface,clinically actionable,druggable genome,g protein coupled receptor,kinase,tumor suppressor,tyrosine kinase
B58	PDGFRB	MOTESANIB	n/a	TdgClinicalTrial	cell surface,clinically actionable,druggable genome,g protein coupled receptor,kinase,tumor suppressor,tyrosine kinase
B58	PDGFRB	NILOTINIB	inhibitor	MyCancerGenomeClinicalTrial	cell surface,clinically actionable,druggable genome,g protein coupled receptor,kinase,tumor suppressor,tyrosine kinase
B58	PDGFRB	NINTEDANIB	inhibitor	MyCancerGenome	cell surface,clinically actionable,druggable genome,g protein coupled receptor,kinase,tumor suppressor,tyrosine kinase
B58	PDGFRB	NINTEDANIB	n/a	ClearityFoundationClinicalTrial	cell surface,clinically actionable,druggable genome,g protein coupled receptor,kinase,tumor suppressor,tyrosine kinase
B58	PDGFRB	NINTEDANIB	n/a	TdgClinicalTrial	cell surface,clinically actionable,druggable genome,g protein coupled receptor,kinase,tumor suppressor,tyrosine kinase
B58	PDGFRB	PAZOPANIB	inhibitor	MyCancerGenome	cell surface,clinically actionable,druggable genome,g protein coupled receptor,kinase,tumor suppressor,tyrosine kinase
B58	PDGFRB	PAZOPANIB	inhibitor	MyCancerGenomeClinicalTrial	cell surface,clinically actionable,druggable genome,g protein coupled receptor,kinase,tumor suppressor,tyrosine kinase
B58	PDGFRB	PAZOPANIB	inhibitor	TALC	cell surface,clinically actionable,druggable genome,g protein coupled receptor,kinase,tumor suppressor,tyrosine kinase
B58	PDGFRB	REGORAFENIB	inhibitor	DrugBank	cell surface,clinically actionable,druggable genome,g protein coupled receptor,kinase,tumor suppressor,tyrosine kinase
B58	PDGFRB	REGORAFENIB	inhibitor	MyCancerGenome	cell surface,clinically actionable,druggable genome,g protein coupled receptor,kinase,tumor suppressor,tyrosine kinase
B58	PDGFRB	REGORAFENIB	inhibitor	MyCancerGenomeClinicalTrial	cell surface,clinically actionable,druggable genome,g protein coupled receptor,kinase,tumor suppressor,tyrosine kinase
B58	PDGFRB	REGORAFENIB	inhibitor	TALC	cell surface,clinically actionable,druggable genome,g protein coupled receptor,kinase,tumor suppressor,tyrosine kinase
B58	PDGFRB	SORAFENIB	antagonist	DrugBank	cell surface,clinically actionable,druggable genome,g protein coupled receptor,kinase,tumor suppressor,tyrosine kinase
B58	PDGFRB	SORAFENIB	inhibitor	MyCancerGenome	cell surface,clinically actionable,druggable genome,g protein coupled receptor,kinase,tumor suppressor,tyrosine kinase
B58	PDGFRB	SORAFENIB	inhibitor	MyCancerGenomeClinicalTrial	cell surface,clinically actionable,druggable genome,g protein coupled receptor,kinase,tumor suppressor,tyrosine kinase
B58	PDGFRB	SORAFENIB	inhibitor	TALC	cell surface,clinically actionable,druggable genome,g protein coupled receptor,kinase,tumor suppressor,tyrosine kinase
B58	PDGFRB	SORAFENIB	n/a	ClearityFoundationClinicalTrial	cell surface,clinically actionable,druggable genome,g protein coupled receptor,kinase,tumor suppressor,tyrosine kinase
B58	PDGFRB	SORAFENIB	n/a	TEND	cell surface,clinically actionable,druggable genome,g protein coupled receptor,kinase,tumor suppressor,tyrosine kinase
B58	PDGFRB	SORAFENIB	n/a	TdgClinicalTrial	cell surface,clinically actionable,druggable genome,g protein coupled receptor,kinase,tumor suppressor,tyrosine kinase
B58	PDGFRB	SORAFENIB TOSYLATE	inhibitor	MyCancerGenomeClinicalTrial	cell surface,clinically actionable,druggable genome,g protein coupled receptor,kinase,tumor suppressor,tyrosine kinase
B58	PDGFRB	SUNITINIB	inhibitor	TALC	cell surface,clinically actionable,druggable genome,g protein coupled receptor,kinase,tumor suppressor,tyrosine kinase
B58	PDGFRB	SUNITINIB	n/a	TEND	cell surface,clinically actionable,druggable genome,g protein coupled receptor,kinase,tumor suppressor,tyrosine kinase
B58	PDGFRB	SUNITINIB	n/a	TdgClinicalTrial	cell surface,clinically actionable,druggable genome,g protein coupled receptor,kinase,tumor suppressor,tyrosine kinase
B58	PDGFRB	TANDUTINIB	inhibitor	MyCancerGenome	cell surface,clinically actionable,druggable genome,g protein coupled receptor,kinase,tumor suppressor,tyrosine kinase
B58	PDGFRB	TELATINIB	inhibitor	MyCancerGenome	cell surface,clinically actionable,druggable genome,g protein coupled receptor,kinase,tumor suppressor,tyrosine kinase
B58	PDGFRB	TELATINIB	inhibitor	TALC	cell surface,clinically actionable,druggable genome,g protein coupled receptor,kinase,tumor suppressor,tyrosine kinase
B58	PDGFRB	TELATINIB	n/a	TdgClinicalTrial	cell surface,clinically actionable,druggable genome,g protein coupled receptor,kinase,tumor suppressor,tyrosine kinase
B58	PDGFRB	TSU-68	inhibitor	TALC	cell surface,clinically actionable,druggable genome,g protein coupled receptor,kinase,tumor suppressor,tyrosine kinase
B58	PDGFRB	VATALANIB	inhibitor	TALC	cell surface,clinically actionable,druggable genome,g protein coupled receptor,kinase,tumor suppressor,tyrosine kinase
B58	PDGFRB	VATALANIB	n/a	TdgClinicalTrial	cell surface,clinically actionable,druggable genome,g protein coupled receptor,kinase,tumor suppressor,tyrosine kinase
B58	TUBA8	EPOTHILONE B	n/a	DrugBank	druggable genome
B65	PTEN	1372540-25-4	inhibitor	MyCancerGenomeClinicalTrial	clinically actionable,drug resistance,druggable genome,protein phosphatase,pten family,tumor suppressor
B65	PTEN	ERLOTINIB	n/a	ClearityFoundationBiomarkers	clinically actionable,drug resistance,druggable genome,protein phosphatase,pten family,tumor suppressor
B65	PTEN	EVEROLIMUS	n/a	ClearityFoundationBiomarkers	clinically actionable,drug resistance,druggable genome,protein phosphatase,pten family,tumor suppressor
B65	PTEN	GEFITINIB	n/a	ClearityFoundationBiomarkers	clinically actionable,drug resistance,druggable genome,protein phosphatase,pten family,tumor suppressor
B65	PTEN	GSK2126458	n/a	ClearityFoundationBiomarkers	clinically actionable,drug resistance,druggable genome,protein phosphatase,pten family,tumor suppressor
B65	PTEN	PF-04691502	n/a	ClearityFoundationBiomarkers	clinically actionable,drug resistance,druggable genome,protein phosphatase,pten family,tumor suppressor
B65	PTEN	TEMSIROLIMUS	n/a	ClearityFoundationBiomarkers	clinically actionable,drug resistance,druggable genome,protein phosphatase,pten family,tumor suppressor
B65	PTEN	VANDETANIB	n/a	ClearityFoundationBiomarkers	clinically actionable,drug resistance,druggable genome,protein phosphatase,pten family,tumor suppressor
B65	PTEN	XL765	n/a	ClearityFoundationBiomarkers	clinically actionable,drug resistance,druggable genome,protein phosphatase,pten family,tumor suppressor
B65	PTEN	ZSTK474	n/a	ClearityFoundationBiomarkers	clinically actionable,drug resistance,druggable genome,protein phosphatase,pten family,tumor suppressor
B67	PIK3CA	EVEROLIMUS	n/a	ClearityFoundationBiomarkers	clinically actionable,druggable genome,kinase,phosphatidylinositol 3 kinase,serine threonine kinase
B67	PIK3CA	GDC-0032	inhibitor	MyCancerGenome	clinically actionable,druggable genome,kinase,phosphatidylinositol 3 kinase,serine threonine kinase
B67	PIK3CA	GDC-0941	inhibitor	MyCancerGenome	clinically actionable,druggable genome,kinase,phosphatidylinositol 3 kinase,serine threonine kinase
B67	PIK3CA	GDC-0941	inhibitor	TALC	clinically actionable,druggable genome,kinase,phosphatidylinositol 3 kinase,serine threonine kinase
B67	PIK3CA	GDC-0980	inhibitor	MyCancerGenome	clinically actionable,druggable genome,kinase,phosphatidylinositol 3 kinase,serine threonine kinase
B67	PIK3CA	GSK2126458	inhibitor	MyCancerGenomeClinicalTrial	clinically actionable,druggable genome,kinase,phosphatidylinositol 3 kinase,serine threonine kinase
B67	PIK3CA	GSK2126458	n/a	ClearityFoundationBiomarkers	clinically actionable,druggable genome,kinase,phosphatidylinositol 3 kinase,serine threonine kinase
B67	PIK3CA	GSK2636771	inhibitor	MyCancerGenome	clinically actionable,druggable genome,kinase,phosphatidylinositol 3 kinase,serine threonine kinase
B67	PIK3CA	INK-1117	inhibitor	MyCancerGenome	clinically actionable,druggable genome,kinase,phosphatidylinositol 3 kinase,serine threonine kinase
B67	PIK3CA	NVP-BGT226	inhibitor	TALC	clinically actionable,druggable genome,kinase,phosphatidylinositol 3 kinase,serine threonine kinase
B67	PIK3CA	PF-04691502	inhibitor	TALC	clinically actionable,druggable genome,kinase,phosphatidylinositol 3 kinase,serine threonine kinase
B67	PIK3CA	PF-04691502	n/a	ClearityFoundationBiomarkers	clinically actionable,druggable genome,kinase,phosphatidylinositol 3 kinase,serine threonine kinase
B67	PIK3CA	PI-103	inhibitor	MyCancerGenome	clinically actionable,druggable genome,kinase,phosphatidylinositol 3 kinase,serine threonine kinase
B67	PIK3CA	PKI-587	inhibitor	MyCancerGenome	clinically actionable,druggable genome,kinase,phosphatidylinositol 3 kinase,serine threonine kinase
B67	PIK3CA	PKI-587	inhibitor	MyCancerGenomeClinicalTrial	clinically actionable,druggable genome,kinase,phosphatidylinositol 3 kinase,serine threonine kinase
B67	PIK3CA	RIGOSERTIB	n/a	TdgClinicalTrial	clinically actionable,druggable genome,kinase,phosphatidylinositol 3 kinase,serine threonine kinase
B67	PIK3CA	SF1126	inhibitor	MyCancerGenome	clinically actionable,druggable genome,kinase,phosphatidylinositol 3 kinase,serine threonine kinase
B67	PIK3CA	SF1126	n/a	TdgClinicalTrial	clinically actionable,druggable genome,kinase,phosphatidylinositol 3 kinase,serine threonine kinase
B67	PIK3CA	SOPHORETIN	inhibitor	MyCancerGenome	clinically actionable,druggable genome,kinase,phosphatidylinositol 3 kinase,serine threonine kinase
B67	PIK3CA	TEMSIROLIMUS	n/a	ClearityFoundationBiomarkers	clinically actionable,druggable genome,kinase,phosphatidylinositol 3 kinase,serine threonine kinase
B67	PIK3CA	XL147	inhibitor	MyCancerGenome	clinically actionable,druggable genome,kinase,phosphatidylinositol 3 kinase,serine threonine kinase
B67	PIK3CA	XL147	inhibitor	TALC	clinically actionable,druggable genome,kinase,phosphatidylinositol 3 kinase,serine threonine kinase
B67	PIK3CA	XL147	n/a	DrugBank	clinically actionable,druggable genome,kinase,phosphatidylinositol 3 kinase,serine threonine kinase
B67	PIK3CA	XL765	inhibitor	CancerCommons	clinically actionable,druggable genome,kinase,phosphatidylinositol 3 kinase,serine threonine kinase
B67	PIK3CA	XL765	inhibitor	TALC	clinically actionable,druggable genome,kinase,phosphatidylinositol 3 kinase,serine threonine kinase
B67	PIK3CA	XL765	n/a	ClearityFoundationBiomarkers	clinically actionable,druggable genome,kinase,phosphatidylinositol 3 kinase,serine threonine kinase
B67	PIK3CA	XL765	n/a	DrugBank	clinically actionable,druggable genome,kinase,phosphatidylinositol 3 kinase,serine threonine kinase
B67	PIK3CA	XL765	n/a	TdgClinicalTrial	clinically actionable,druggable genome,kinase,phosphatidylinositol 3 kinase,serine threonine kinase
B67	PIK3CA	ZSTK474	n/a	ClearityFoundationBiomarkers	clinically actionable,druggable genome,kinase,phosphatidylinositol 3 kinase,serine threonine kinase
B67	PIK3CG	GDC-0941	inhibitor	MyCancerGenome	clinically actionable,druggable genome,kinase,phosphatidylinositol 3 kinase,serine threonine kinase
B67	PIK3CG	GDC-0980	inhibitor	MyCancerGenome	clinically actionable,druggable genome,kinase,phosphatidylinositol 3 kinase,serine threonine kinase
B67	PIK3CG	GSK2126458	inhibitor	MyCancerGenomeClinicalTrial	clinically actionable,druggable genome,kinase,phosphatidylinositol 3 kinase,serine threonine kinase
B67	PIK3CG	GSK2636771	inhibitor	MyCancerGenome	clinically actionable,druggable genome,kinase,phosphatidylinositol 3 kinase,serine threonine kinase
B67	PIK3CG	PI-103	inhibitor	MyCancerGenome	clinically actionable,druggable genome,kinase,phosphatidylinositol 3 kinase,serine threonine kinase
B67	PIK3CG	PKI-587	inhibitor	MyCancerGenome	clinically actionable,druggable genome,kinase,phosphatidylinositol 3 kinase,serine threonine kinase
B67	PIK3CG	PKI-587	inhibitor	MyCancerGenomeClinicalTrial	clinically actionable,druggable genome,kinase,phosphatidylinositol 3 kinase,serine threonine kinase
B67	PIK3CG	SF1126	inhibitor	MyCancerGenome	clinically actionable,druggable genome,kinase,phosphatidylinositol 3 kinase,serine threonine kinase
B67	PIK3CG	SF1126	n/a	TdgClinicalTrial	clinically actionable,druggable genome,kinase,phosphatidylinositol 3 kinase,serine threonine kinase
B67	PIK3CG	SOPHORETIN	inhibitor	MyCancerGenome	clinically actionable,druggable genome,kinase,phosphatidylinositol 3 kinase,serine threonine kinase
B67	PIK3CG	XL147	inhibitor	MyCancerGenome	clinically actionable,druggable genome,kinase,phosphatidylinositol 3 kinase,serine threonine kinase
B67	PIK3CG	XL765	n/a	DrugBank	clinically actionable,druggable genome,kinase,phosphatidylinositol 3 kinase,serine threonine kinase
B67	PIK3CG	XL765	n/a	TdgClinicalTrial	clinically actionable,druggable genome,kinase,phosphatidylinositol 3 kinase,serine threonine kinase
B67	PRKD1	BRYOSTATIN-1	n/a	TdgClinicalTrial	druggable genome,kinase,serine threonine kinase
B67	PRKD1	SOPHORETIN	inhibitor	MyCancerGenome	druggable genome,kinase,serine threonine kinase
B67	RPS6KA3	AT9283	inhibitor	TALC	druggable genome,kinase,protease inhibitor,serine threonine kinase
B67	RYR1	SURAMIN	agonist	DrugBank	b30_2 spry domain,druggable genome,ion channel,transporter
B71	KDR	1058137-23-7	inhibitor	MyCancerGenomeClinicalTrial	cell surface,clinically actionable,druggable genome,external side of plasma membrane,kinase,tyrosine kinase
B71	KDR	AEE 788	inhibitor	TALC	cell surface,clinically actionable,druggable genome,external side of plasma membrane,kinase,tyrosine kinase
B71	KDR	APATINIB	inhibitor	MyCancerGenome	cell surface,clinically actionable,druggable genome,external side of plasma membrane,kinase,tyrosine kinase
B71	KDR	AXITINIB	inhibitor	CancerCommons	cell surface,clinically actionable,druggable genome,external side of plasma membrane,kinase,tyrosine kinase
B71	KDR	AXITINIB	inhibitor	MyCancerGenome	cell surface,clinically actionable,druggable genome,external side of plasma membrane,kinase,tyrosine kinase
B71	KDR	AXITINIB	inhibitor	MyCancerGenomeClinicalTrial	cell surface,clinically actionable,druggable genome,external side of plasma membrane,kinase,tyrosine kinase
B71	KDR	AXITINIB	inhibitor	TALC	cell surface,clinically actionable,druggable genome,external side of plasma membrane,kinase,tyrosine kinase
B71	KDR	AXITINIB	n/a	TdgClinicalTrial	cell surface,clinically actionable,druggable genome,external side of plasma membrane,kinase,tyrosine kinase
B71	KDR	BMS-690514	inhibitor	TALC	cell surface,clinically actionable,druggable genome,external side of plasma membrane,kinase,tyrosine kinase
B71	KDR	BRIVANIB	inhibitor	MyCancerGenome	cell surface,clinically actionable,druggable genome,external side of plasma membrane,kinase,tyrosine kinase
B71	KDR	BRIVANIB	inhibitor	TALC	cell surface,clinically actionable,druggable genome,external side of plasma membrane,kinase,tyrosine kinase
B71	KDR	CABOZANTINIB	inhibitor	MyCancerGenome	cell surface,clinically actionable,druggable genome,external side of plasma membrane,kinase,tyrosine kinase
B71	KDR	CABOZANTINIB	inhibitor	TALC	cell surface,clinically actionable,druggable genome,external side of plasma membrane,kinase,tyrosine kinase
B71	KDR	CABOZANTINIB	n/a	ClearityFoundationClinicalTrial	cell surface,clinically actionable,druggable genome,external side of plasma membrane,kinase,tyrosine kinase
B71	KDR	CABOZANTINIB	n/a	TdgClinicalTrial	cell surface,clinically actionable,druggable genome,external side of plasma membrane,kinase,tyrosine kinase
B71	KDR	CEDIRANIB	inhibitor	MyCancerGenome	cell surface,clinically actionable,druggable genome,external side of plasma membrane,kinase,tyrosine kinase
B71	KDR	CEDIRANIB	inhibitor	TALC	cell surface,clinically actionable,druggable genome,external side of plasma membrane,kinase,tyrosine kinase
B71	KDR	CEDIRANIB	n/a	TdgClinicalTrial	cell surface,clinically actionable,druggable genome,external side of plasma membrane,kinase,tyrosine kinase
B71	KDR	DOVITINIB	inhibitor	TALC	cell surface,clinically actionable,druggable genome,external side of plasma membrane,kinase,tyrosine kinase
B71	KDR	DOVITINIB	n/a	TdgClinicalTrial	cell surface,clinically actionable,druggable genome,external side of plasma membrane,kinase,tyrosine kinase
B71	KDR	ENMD-2076	inhibitor	MyCancerGenome	cell surface,clinically actionable,druggable genome,external side of plasma membrane,kinase,tyrosine kinase
B71	KDR	ENMD-2076	n/a	TdgClinicalTrial	cell surface,clinically actionable,druggable genome,external side of plasma membrane,kinase,tyrosine kinase
B71	KDR	FORETINIB	inhibitor	MyCancerGenome	cell surface,clinically actionable,druggable genome,external side of plasma membrane,kinase,tyrosine kinase
B71	KDR	FORETINIB	inhibitor	TALC	cell surface,clinically actionable,druggable genome,external side of plasma membrane,kinase,tyrosine kinase
B71	KDR	LENVATINIB	inhibitor	MyCancerGenome	cell surface,clinically actionable,druggable genome,external side of plasma membrane,kinase,tyrosine kinase
B71	KDR	LENVATINIB	inhibitor	TALC	cell surface,clinically actionable,druggable genome,external side of plasma membrane,kinase,tyrosine kinase
B71	KDR	LENVATINIB	n/a	TdgClinicalTrial	cell surface,clinically actionable,druggable genome,external side of plasma membrane,kinase,tyrosine kinase
B71	KDR	LINIFANIB	inhibitor	MyCancerGenome	cell surface,clinically actionable,druggable genome,external side of plasma membrane,kinase,tyrosine kinase
B71	KDR	LINIFANIB	inhibitor	TALC	cell surface,clinically actionable,druggable genome,external side of plasma membrane,kinase,tyrosine kinase
B71	KDR	LINIFANIB	n/a	TdgClinicalTrial	cell surface,clinically actionable,druggable genome,external side of plasma membrane,kinase,tyrosine kinase
B71	KDR	MIDOSTAURIN	inhibitor	MyCancerGenome	cell surface,clinically actionable,druggable genome,external side of plasma membrane,kinase,tyrosine kinase
B71	KDR	MOTESANIB	inhibitor	MyCancerGenome	cell surface,clinically actionable,druggable genome,external side of plasma membrane,kinase,tyrosine kinase
B71	KDR	MOTESANIB	inhibitor	TALC	cell surface,clinically actionable,druggable genome,external side of plasma membrane,kinase,tyrosine kinase
B71	KDR	MOTESANIB	n/a	TdgClinicalTrial	cell surface,clinically actionable,druggable genome,external side of plasma membrane,kinase,tyrosine kinase
B71	KDR	NINTEDANIB	inhibitor	MyCancerGenome	cell surface,clinically actionable,druggable genome,external side of plasma membrane,kinase,tyrosine kinase
B71	KDR	NINTEDANIB	n/a	TdgClinicalTrial	cell surface,clinically actionable,druggable genome,external side of plasma membrane,kinase,tyrosine kinase
B71	KDR	OSI-930	n/a	TdgClinicalTrial	cell surface,clinically actionable,druggable genome,external side of plasma membrane,kinase,tyrosine kinase
B71	KDR	PAZOPANIB	inhibitor	MyCancerGenome	cell surface,clinically actionable,druggable genome,external side of plasma membrane,kinase,tyrosine kinase
B71	KDR	PAZOPANIB	inhibitor	MyCancerGenomeClinicalTrial	cell surface,clinically actionable,druggable genome,external side of plasma membrane,kinase,tyrosine kinase
B71	KDR	PAZOPANIB	inhibitor	TALC	cell surface,clinically actionable,druggable genome,external side of plasma membrane,kinase,tyrosine kinase
B71	KDR	PAZOPANIB	n/a	TdgClinicalTrial	cell surface,clinically actionable,druggable genome,external side of plasma membrane,kinase,tyrosine kinase
B71	KDR	PONATINIB	inhibitor	MyCancerGenome	cell surface,clinically actionable,druggable genome,external side of plasma membrane,kinase,tyrosine kinase
B71	KDR	RAF265	inhibitor	MyCancerGenome	cell surface,clinically actionable,druggable genome,external side of plasma membrane,kinase,tyrosine kinase
B71	KDR	REGORAFENIB	inhibitor	DrugBank	cell surface,clinically actionable,druggable genome,external side of plasma membrane,kinase,tyrosine kinase
B71	KDR	REGORAFENIB	inhibitor	MyCancerGenome	cell surface,clinically actionable,druggable genome,external side of plasma membrane,kinase,tyrosine kinase
B71	KDR	REGORAFENIB	inhibitor	MyCancerGenomeClinicalTrial	cell surface,clinically actionable,druggable genome,external side of plasma membrane,kinase,tyrosine kinase
B71	KDR	REGORAFENIB	inhibitor	TALC	cell surface,clinically actionable,druggable genome,external side of plasma membrane,kinase,tyrosine kinase
B71	KDR	REGORAFENIB	n/a	TdgClinicalTrial	cell surface,clinically actionable,druggable genome,external side of plasma membrane,kinase,tyrosine kinase
B71	KDR	SORAFENIB	antagonist	DrugBank	cell surface,clinically actionable,druggable genome,external side of plasma membrane,kinase,tyrosine kinase
B71	KDR	SORAFENIB	inhibitor	MyCancerGenome	cell surface,clinically actionable,druggable genome,external side of plasma membrane,kinase,tyrosine kinase
B71	KDR	SORAFENIB	inhibitor	MyCancerGenomeClinicalTrial	cell surface,clinically actionable,druggable genome,external side of plasma membrane,kinase,tyrosine kinase
B71	KDR	SORAFENIB	inhibitor	TALC	cell surface,clinically actionable,druggable genome,external side of plasma membrane,kinase,tyrosine kinase
B71	KDR	SORAFENIB	n/a	TEND	cell surface,clinically actionable,druggable genome,external side of plasma membrane,kinase,tyrosine kinase
B71	KDR	SORAFENIB	n/a	TdgClinicalTrial	cell surface,clinically actionable,druggable genome,external side of plasma membrane,kinase,tyrosine kinase
B71	KDR	SORAFENIB TOSYLATE	inhibitor	MyCancerGenomeClinicalTrial	cell surface,clinically actionable,druggable genome,external side of plasma membrane,kinase,tyrosine kinase
B71	KDR	SUNITINIB	inhibitor	MyCancerGenomeClinicalTrial	cell surface,clinically actionable,druggable genome,external side of plasma membrane,kinase,tyrosine kinase
B71	KDR	SUNITINIB	inhibitor	TALC	cell surface,clinically actionable,druggable genome,external side of plasma membrane,kinase,tyrosine kinase
B71	KDR	SUNITINIB	n/a	TEND	cell surface,clinically actionable,druggable genome,external side of plasma membrane,kinase,tyrosine kinase
B71	KDR	SUNITINIB	n/a	TdgClinicalTrial	cell surface,clinically actionable,druggable genome,external side of plasma membrane,kinase,tyrosine kinase
B71	KDR	TELATINIB	inhibitor	MyCancerGenome	cell surface,clinically actionable,druggable genome,external side of plasma membrane,kinase,tyrosine kinase
B71	KDR	TELATINIB	inhibitor	TALC	cell surface,clinically actionable,druggable genome,external side of plasma membrane,kinase,tyrosine kinase
B71	KDR	TELATINIB	n/a	TdgClinicalTrial	cell surface,clinically actionable,druggable genome,external side of plasma membrane,kinase,tyrosine kinase
B71	KDR	TIVOZANIB	inhibitor	MyCancerGenome	cell surface,clinically actionable,druggable genome,external side of plasma membrane,kinase,tyrosine kinase
B71	KDR	TIVOZANIB	inhibitor	TALC	cell surface,clinically actionable,druggable genome,external side of plasma membrane,kinase,tyrosine kinase
B71	KDR	TIVOZANIB	n/a	TdgClinicalTrial	cell surface,clinically actionable,druggable genome,external side of plasma membrane,kinase,tyrosine kinase
B71	KDR	TSU-68	inhibitor	TALC	cell surface,clinically actionable,druggable genome,external side of plasma membrane,kinase,tyrosine kinase
B71	KDR	VANDETANIB	inhibitor	MyCancerGenome	cell surface,clinically actionable,druggable genome,external side of plasma membrane,kinase,tyrosine kinase
B71	KDR	VANDETANIB	inhibitor	MyCancerGenomeClinicalTrial	cell surface,clinically actionable,druggable genome,external side of plasma membrane,kinase,tyrosine kinase
B71	KDR	VANDETANIB	inhibitor	TALC	cell surface,clinically actionable,druggable genome,external side of plasma membrane,kinase,tyrosine kinase
B71	KDR	VANDETANIB	n/a	TdgClinicalTrial	cell surface,clinically actionable,druggable genome,external side of plasma membrane,kinase,tyrosine kinase
B71	KDR	VATALANIB	inhibitor	MyCancerGenome	cell surface,clinically actionable,druggable genome,external side of plasma membrane,kinase,tyrosine kinase
B71	KDR	VATALANIB	inhibitor	TALC	cell surface,clinically actionable,druggable genome,external side of plasma membrane,kinase,tyrosine kinase
B71	KDR	VATALANIB	n/a	DrugBank	cell surface,clinically actionable,druggable genome,external side of plasma membrane,kinase,tyrosine kinase
B71	KDR	VATALANIB	n/a	TdgClinicalTrial	cell surface,clinically actionable,druggable genome,external side of plasma membrane,kinase,tyrosine kinase
B71	NOTCH4	RO4929097	other/unknown	MyCancerGenome	cell surface,clinically actionable
B72	EGFR	AEE 788	inhibitor	TALC	cell surface,clinically actionable,druggable genome,kinase,serine threonine kinase,tumor suppressor,tyrosine kinase
B72	EGFR	AFATINIB	inhibitor	MyCancerGenome	cell surface,clinically actionable,druggable genome,kinase,serine threonine kinase,tumor suppressor,tyrosine kinase
B72	EGFR	AFATINIB	inhibitor	MyCancerGenomeClinicalTrial	cell surface,clinically actionable,druggable genome,kinase,serine threonine kinase,tumor suppressor,tyrosine kinase
B72	EGFR	AFATINIB	inhibitor	TALC	cell surface,clinically actionable,druggable genome,kinase,serine threonine kinase,tumor suppressor,tyrosine kinase
B72	EGFR	AFATINIB	n/a	TdgClinicalTrial	cell surface,clinically actionable,druggable genome,kinase,serine threonine kinase,tumor suppressor,tyrosine kinase
B72	EGFR	AKOS004227608	n/a	ClearityFoundationClinicalTrial	cell surface,clinically actionable,druggable genome,kinase,serine threonine kinase,tumor suppressor,tyrosine kinase
B72	EGFR	AP26113	inhibitor	MyCancerGenomeClinicalTrial	cell surface,clinically actionable,druggable genome,kinase,serine threonine kinase,tumor suppressor,tyrosine kinase
B72	EGFR	AZD8931	inhibitor	MyCancerGenome	cell surface,clinically actionable,druggable genome,kinase,serine threonine kinase,tumor suppressor,tyrosine kinase
B72	EGFR	BMS-599626	inhibitor	MyCancerGenome	cell surface,clinically actionable,druggable genome,kinase,serine threonine kinase,tumor suppressor,tyrosine kinase
B72	EGFR	BMS-599626	inhibitor	TALC	cell surface,clinically actionable,druggable genome,kinase,serine threonine kinase,tumor suppressor,tyrosine kinase
B72	EGFR	BMS-690514	inhibitor	TALC	cell surface,clinically actionable,druggable genome,kinase,serine threonine kinase,tumor suppressor,tyrosine kinase
B72	EGFR	CO-1686	inhibitor	MyCancerGenome	cell surface,clinically actionable,druggable genome,kinase,serine threonine kinase,tumor suppressor,tyrosine kinase
B72	EGFR	CUDC-101	inhibitor	TALC	cell surface,clinically actionable,druggable genome,kinase,serine threonine kinase,tumor suppressor,tyrosine kinase
B72	EGFR	CUDC-101	n/a	TdgClinicalTrial	cell surface,clinically actionable,druggable genome,kinase,serine threonine kinase,tumor suppressor,tyrosine kinase
B72	EGFR	DACOMITINIB	inhibitor	MyCancerGenome	cell surface,clinically actionable,druggable genome,kinase,serine threonine kinase,tumor suppressor,tyrosine kinase
B72	EGFR	DACOMITINIB	inhibitor	MyCancerGenomeClinicalTrial	cell surface,clinically actionable,druggable genome,kinase,serine threonine kinase,tumor suppressor,tyrosine kinase
B72	EGFR	DACOMITINIB	inhibitor	TALC	cell surface,clinically actionable,druggable genome,kinase,serine threonine kinase,tumor suppressor,tyrosine kinase
B72	EGFR	DACOMITINIB	n/a	TdgClinicalTrial	cell surface,clinically actionable,druggable genome,kinase,serine threonine kinase,tumor suppressor,tyrosine kinase
B72	EGFR	ERLOTINIB	inhibitor	CancerCommons	cell surface,clinically actionable,druggable genome,kinase,serine threonine kinase,tumor suppressor,tyrosine kinase
B72	EGFR	ERLOTINIB	inhibitor	MyCancerGenome	cell surface,clinically actionable,druggable genome,kinase,serine threonine kinase,tumor suppressor,tyrosine kinase
B72	EGFR	ERLOTINIB	inhibitor	TALC	cell surface,clinically actionable,druggable genome,kinase,serine threonine kinase,tumor suppressor,tyrosine kinase
B72	EGFR	ERLOTINIB	n/a	ClearityFoundationBiomarkers	cell surface,clinically actionable,druggable genome,kinase,serine threonine kinase,tumor suppressor,tyrosine kinase
B72	EGFR	ERLOTINIB	n/a	ClearityFoundationClinicalTrial	cell surface,clinically actionable,druggable genome,kinase,serine threonine kinase,tumor suppressor,tyrosine kinase
B72	EGFR	ERLOTINIB	n/a	TEND	cell surface,clinically actionable,druggable genome,kinase,serine threonine kinase,tumor suppressor,tyrosine kinase
B72	EGFR	ERLOTINIB	n/a	TdgClinicalTrial	cell surface,clinically actionable,druggable genome,kinase,serine threonine kinase,tumor suppressor,tyrosine kinase
B72	EGFR	ERLOTINIB HYDROCHLORIDE	inhibitor	MyCancerGenomeClinicalTrial	cell surface,clinically actionable,druggable genome,kinase,serine threonine kinase,tumor suppressor,tyrosine kinase
B72	EGFR	GEFITINIB	inhibitor	MyCancerGenome	cell surface,clinically actionable,druggable genome,kinase,serine threonine kinase,tumor suppressor,tyrosine kinase
B72	EGFR	GEFITINIB	inhibitor	MyCancerGenomeClinicalTrial	cell surface,clinically actionable,druggable genome,kinase,serine threonine kinase,tumor suppressor,tyrosine kinase
B72	EGFR	GEFITINIB	inhibitor	TALC	cell surface,clinically actionable,druggable genome,kinase,serine threonine kinase,tumor suppressor,tyrosine kinase
B72	EGFR	GEFITINIB	n/a	ClearityFoundationBiomarkers	cell surface,clinically actionable,druggable genome,kinase,serine threonine kinase,tumor suppressor,tyrosine kinase
B72	EGFR	GEFITINIB	n/a	TEND	cell surface,clinically actionable,druggable genome,kinase,serine threonine kinase,tumor suppressor,tyrosine kinase
B72	EGFR	GEFITINIB	n/a	TdgClinicalTrial	cell surface,clinically actionable,druggable genome,kinase,serine threonine kinase,tumor suppressor,tyrosine kinase
B72	EGFR	ICOTINIB	inhibitor	MyCancerGenome	cell surface,clinically actionable,druggable genome,kinase,serine threonine kinase,tumor suppressor,tyrosine kinase
B72	EGFR	ICOTINIB	inhibitor	MyCancerGenomeClinicalTrial	cell surface,clinically actionable,druggable genome,kinase,serine threonine kinase,tumor suppressor,tyrosine kinase
B72	EGFR	ICOTINIB	inhibitor	TALC	cell surface,clinically actionable,druggable genome,kinase,serine threonine kinase,tumor suppressor,tyrosine kinase
B72	EGFR	LAPATINIB	inhibitor	CancerCommons	cell surface,clinically actionable,druggable genome,kinase,serine threonine kinase,tumor suppressor,tyrosine kinase
B72	EGFR	LAPATINIB	n/a	ClearityFoundationClinicalTrial	cell surface,clinically actionable,druggable genome,kinase,serine threonine kinase,tumor suppressor,tyrosine kinase
B72	EGFR	LAPATINIB	n/a	TEND	cell surface,clinically actionable,druggable genome,kinase,serine threonine kinase,tumor suppressor,tyrosine kinase
B72	EGFR	LAPATINIB	n/a	TdgClinicalTrial	cell surface,clinically actionable,druggable genome,kinase,serine threonine kinase,tumor suppressor,tyrosine kinase
B72	EGFR	LAPATINIB DITOSYLATE	inhibitor	MyCancerGenomeClinicalTrial	cell surface,clinically actionable,druggable genome,kinase,serine threonine kinase,tumor suppressor,tyrosine kinase
B72	EGFR	MOMELOTINIB	inhibitor	TALC	cell surface,clinically actionable,druggable genome,kinase,serine threonine kinase,tumor suppressor,tyrosine kinase
B72	EGFR	NERATINIB	inhibitor	TALC	cell surface,clinically actionable,druggable genome,kinase,serine threonine kinase,tumor suppressor,tyrosine kinase
B72	EGFR	NERATINIB	n/a	TdgClinicalTrial	cell surface,clinically actionable,druggable genome,kinase,serine threonine kinase,tumor suppressor,tyrosine kinase
B72	EGFR	PELITINIB	inhibitor	MyCancerGenome	cell surface,clinically actionable,druggable genome,kinase,serine threonine kinase,tumor suppressor,tyrosine kinase
B72	EGFR	PELITINIB	inhibitor	TALC	cell surface,clinically actionable,druggable genome,kinase,serine threonine kinase,tumor suppressor,tyrosine kinase
B72	EGFR	POZIOTINIB	inhibitor	MyCancerGenomeClinicalTrial	cell surface,clinically actionable,druggable genome,kinase,serine threonine kinase,tumor suppressor,tyrosine kinase
B72	EGFR	VANDETANIB	inhibitor	MyCancerGenome	cell surface,clinically actionable,druggable genome,kinase,serine threonine kinase,tumor suppressor,tyrosine kinase
B72	EGFR	VANDETANIB	inhibitor	MyCancerGenomeClinicalTrial	cell surface,clinically actionable,druggable genome,kinase,serine threonine kinase,tumor suppressor,tyrosine kinase
B72	EGFR	VANDETANIB	inhibitor	TALC	cell surface,clinically actionable,druggable genome,kinase,serine threonine kinase,tumor suppressor,tyrosine kinase
B72	EGFR	VANDETANIB	n/a	ClearityFoundationBiomarkers	cell surface,clinically actionable,druggable genome,kinase,serine threonine kinase,tumor suppressor,tyrosine kinase
B72	EGFR	VANDETANIB	n/a	ClearityFoundationClinicalTrial	cell surface,clinically actionable,druggable genome,kinase,serine threonine kinase,tumor suppressor,tyrosine kinase
B72	EGFR	VANDETANIB	n/a	TdgClinicalTrial	cell surface,clinically actionable,druggable genome,kinase,serine threonine kinase,tumor suppressor,tyrosine kinase
B74	KDR	1058137-23-7	inhibitor	MyCancerGenomeClinicalTrial	cell surface,clinically actionable,druggable genome,external side of plasma membrane,kinase,tyrosine kinase
B74	KDR	AEE 788	inhibitor	TALC	cell surface,clinically actionable,druggable genome,external side of plasma membrane,kinase,tyrosine kinase
B74	KDR	APATINIB	inhibitor	MyCancerGenome	cell surface,clinically actionable,druggable genome,external side of plasma membrane,kinase,tyrosine kinase
B74	KDR	AXITINIB	inhibitor	CancerCommons	cell surface,clinically actionable,druggable genome,external side of plasma membrane,kinase,tyrosine kinase
B74	KDR	AXITINIB	inhibitor	MyCancerGenome	cell surface,clinically actionable,druggable genome,external side of plasma membrane,kinase,tyrosine kinase
B74	KDR	AXITINIB	inhibitor	MyCancerGenomeClinicalTrial	cell surface,clinically actionable,druggable genome,external side of plasma membrane,kinase,tyrosine kinase
B74	KDR	AXITINIB	inhibitor	TALC	cell surface,clinically actionable,druggable genome,external side of plasma membrane,kinase,tyrosine kinase
B74	KDR	AXITINIB	n/a	TdgClinicalTrial	cell surface,clinically actionable,druggable genome,external side of plasma membrane,kinase,tyrosine kinase
B74	KDR	BMS-690514	inhibitor	TALC	cell surface,clinically actionable,druggable genome,external side of plasma membrane,kinase,tyrosine kinase
B74	KDR	BRIVANIB	inhibitor	MyCancerGenome	cell surface,clinically actionable,druggable genome,external side of plasma membrane,kinase,tyrosine kinase
B74	KDR	BRIVANIB	inhibitor	TALC	cell surface,clinically actionable,druggable genome,external side of plasma membrane,kinase,tyrosine kinase
B74	KDR	CABOZANTINIB	inhibitor	MyCancerGenome	cell surface,clinically actionable,druggable genome,external side of plasma membrane,kinase,tyrosine kinase
B74	KDR	CABOZANTINIB	inhibitor	TALC	cell surface,clinically actionable,druggable genome,external side of plasma membrane,kinase,tyrosine kinase
B74	KDR	CABOZANTINIB	n/a	ClearityFoundationClinicalTrial	cell surface,clinically actionable,druggable genome,external side of plasma membrane,kinase,tyrosine kinase
B74	KDR	CABOZANTINIB	n/a	TdgClinicalTrial	cell surface,clinically actionable,druggable genome,external side of plasma membrane,kinase,tyrosine kinase
B74	KDR	CEDIRANIB	inhibitor	MyCancerGenome	cell surface,clinically actionable,druggable genome,external side of plasma membrane,kinase,tyrosine kinase
B74	KDR	CEDIRANIB	inhibitor	TALC	cell surface,clinically actionable,druggable genome,external side of plasma membrane,kinase,tyrosine kinase
B74	KDR	CEDIRANIB	n/a	TdgClinicalTrial	cell surface,clinically actionable,druggable genome,external side of plasma membrane,kinase,tyrosine kinase
B74	KDR	DOVITINIB	inhibitor	TALC	cell surface,clinically actionable,druggable genome,external side of plasma membrane,kinase,tyrosine kinase
B74	KDR	DOVITINIB	n/a	TdgClinicalTrial	cell surface,clinically actionable,druggable genome,external side of plasma membrane,kinase,tyrosine kinase
B74	KDR	ENMD-2076	inhibitor	MyCancerGenome	cell surface,clinically actionable,druggable genome,external side of plasma membrane,kinase,tyrosine kinase
B74	KDR	ENMD-2076	n/a	TdgClinicalTrial	cell surface,clinically actionable,druggable genome,external side of plasma membrane,kinase,tyrosine kinase
B74	KDR	FORETINIB	inhibitor	MyCancerGenome	cell surface,clinically actionable,druggable genome,external side of plasma membrane,kinase,tyrosine kinase
B74	KDR	FORETINIB	inhibitor	TALC	cell surface,clinically actionable,druggable genome,external side of plasma membrane,kinase,tyrosine kinase
B74	KDR	LENVATINIB	inhibitor	MyCancerGenome	cell surface,clinically actionable,druggable genome,external side of plasma membrane,kinase,tyrosine kinase
B74	KDR	LENVATINIB	inhibitor	TALC	cell surface,clinically actionable,druggable genome,external side of plasma membrane,kinase,tyrosine kinase
B74	KDR	LENVATINIB	n/a	TdgClinicalTrial	cell surface,clinically actionable,druggable genome,external side of plasma membrane,kinase,tyrosine kinase
B74	KDR	LINIFANIB	inhibitor	MyCancerGenome	cell surface,clinically actionable,druggable genome,external side of plasma membrane,kinase,tyrosine kinase
B74	KDR	LINIFANIB	inhibitor	TALC	cell surface,clinically actionable,druggable genome,external side of plasma membrane,kinase,tyrosine kinase
B74	KDR	LINIFANIB	n/a	TdgClinicalTrial	cell surface,clinically actionable,druggable genome,external side of plasma membrane,kinase,tyrosine kinase
B74	KDR	MIDOSTAURIN	inhibitor	MyCancerGenome	cell surface,clinically actionable,druggable genome,external side of plasma membrane,kinase,tyrosine kinase
B74	KDR	MOTESANIB	inhibitor	MyCancerGenome	cell surface,clinically actionable,druggable genome,external side of plasma membrane,kinase,tyrosine kinase
B74	KDR	MOTESANIB	inhibitor	TALC	cell surface,clinically actionable,druggable genome,external side of plasma membrane,kinase,tyrosine kinase
B74	KDR	MOTESANIB	n/a	TdgClinicalTrial	cell surface,clinically actionable,druggable genome,external side of plasma membrane,kinase,tyrosine kinase
B74	KDR	NINTEDANIB	inhibitor	MyCancerGenome	cell surface,clinically actionable,druggable genome,external side of plasma membrane,kinase,tyrosine kinase
B74	KDR	NINTEDANIB	n/a	TdgClinicalTrial	cell surface,clinically actionable,druggable genome,external side of plasma membrane,kinase,tyrosine kinase
B74	KDR	OSI-930	n/a	TdgClinicalTrial	cell surface,clinically actionable,druggable genome,external side of plasma membrane,kinase,tyrosine kinase
B74	KDR	PAZOPANIB	inhibitor	MyCancerGenome	cell surface,clinically actionable,druggable genome,external side of plasma membrane,kinase,tyrosine kinase
B74	KDR	PAZOPANIB	inhibitor	MyCancerGenomeClinicalTrial	cell surface,clinically actionable,druggable genome,external side of plasma membrane,kinase,tyrosine kinase
B74	KDR	PAZOPANIB	inhibitor	TALC	cell surface,clinically actionable,druggable genome,external side of plasma membrane,kinase,tyrosine kinase
B74	KDR	PAZOPANIB	n/a	TdgClinicalTrial	cell surface,clinically actionable,druggable genome,external side of plasma membrane,kinase,tyrosine kinase
B74	KDR	PONATINIB	inhibitor	MyCancerGenome	cell surface,clinically actionable,druggable genome,external side of plasma membrane,kinase,tyrosine kinase
B74	KDR	RAF265	inhibitor	MyCancerGenome	cell surface,clinically actionable,druggable genome,external side of plasma membrane,kinase,tyrosine kinase
B74	KDR	REGORAFENIB	inhibitor	DrugBank	cell surface,clinically actionable,druggable genome,external side of plasma membrane,kinase,tyrosine kinase
B74	KDR	REGORAFENIB	inhibitor	MyCancerGenome	cell surface,clinically actionable,druggable genome,external side of plasma membrane,kinase,tyrosine kinase
B74	KDR	REGORAFENIB	inhibitor	MyCancerGenomeClinicalTrial	cell surface,clinically actionable,druggable genome,external side of plasma membrane,kinase,tyrosine kinase
B74	KDR	REGORAFENIB	inhibitor	TALC	cell surface,clinically actionable,druggable genome,external side of plasma membrane,kinase,tyrosine kinase
B74	KDR	REGORAFENIB	n/a	TdgClinicalTrial	cell surface,clinically actionable,druggable genome,external side of plasma membrane,kinase,tyrosine kinase
B74	KDR	SORAFENIB	antagonist	DrugBank	cell surface,clinically actionable,druggable genome,external side of plasma membrane,kinase,tyrosine kinase
B74	KDR	SORAFENIB	inhibitor	MyCancerGenome	cell surface,clinically actionable,druggable genome,external side of plasma membrane,kinase,tyrosine kinase
B74	KDR	SORAFENIB	inhibitor	MyCancerGenomeClinicalTrial	cell surface,clinically actionable,druggable genome,external side of plasma membrane,kinase,tyrosine kinase
B74	KDR	SORAFENIB	inhibitor	TALC	cell surface,clinically actionable,druggable genome,external side of plasma membrane,kinase,tyrosine kinase
B74	KDR	SORAFENIB	n/a	TEND	cell surface,clinically actionable,druggable genome,external side of plasma membrane,kinase,tyrosine kinase
B74	KDR	SORAFENIB	n/a	TdgClinicalTrial	cell surface,clinically actionable,druggable genome,external side of plasma membrane,kinase,tyrosine kinase
B74	KDR	SORAFENIB TOSYLATE	inhibitor	MyCancerGenomeClinicalTrial	cell surface,clinically actionable,druggable genome,external side of plasma membrane,kinase,tyrosine kinase
B74	KDR	SUNITINIB	inhibitor	MyCancerGenomeClinicalTrial	cell surface,clinically actionable,druggable genome,external side of plasma membrane,kinase,tyrosine kinase
B74	KDR	SUNITINIB	inhibitor	TALC	cell surface,clinically actionable,druggable genome,external side of plasma membrane,kinase,tyrosine kinase
B74	KDR	SUNITINIB	n/a	TEND	cell surface,clinically actionable,druggable genome,external side of plasma membrane,kinase,tyrosine kinase
B74	KDR	SUNITINIB	n/a	TdgClinicalTrial	cell surface,clinically actionable,druggable genome,external side of plasma membrane,kinase,tyrosine kinase
B74	KDR	TELATINIB	inhibitor	MyCancerGenome	cell surface,clinically actionable,druggable genome,external side of plasma membrane,kinase,tyrosine kinase
B74	KDR	TELATINIB	inhibitor	TALC	cell surface,clinically actionable,druggable genome,external side of plasma membrane,kinase,tyrosine kinase
B74	KDR	TELATINIB	n/a	TdgClinicalTrial	cell surface,clinically actionable,druggable genome,external side of plasma membrane,kinase,tyrosine kinase
B74	KDR	TIVOZANIB	inhibitor	MyCancerGenome	cell surface,clinically actionable,druggable genome,external side of plasma membrane,kinase,tyrosine kinase
B74	KDR	TIVOZANIB	inhibitor	TALC	cell surface,clinically actionable,druggable genome,external side of plasma membrane,kinase,tyrosine kinase
B74	KDR	TIVOZANIB	n/a	TdgClinicalTrial	cell surface,clinically actionable,druggable genome,external side of plasma membrane,kinase,tyrosine kinase
B74	KDR	TSU-68	inhibitor	TALC	cell surface,clinically actionable,druggable genome,external side of plasma membrane,kinase,tyrosine kinase
B74	KDR	VANDETANIB	inhibitor	MyCancerGenome	cell surface,clinically actionable,druggable genome,external side of plasma membrane,kinase,tyrosine kinase
B74	KDR	VANDETANIB	inhibitor	MyCancerGenomeClinicalTrial	cell surface,clinically actionable,druggable genome,external side of plasma membrane,kinase,tyrosine kinase
B74	KDR	VANDETANIB	inhibitor	TALC	cell surface,clinically actionable,druggable genome,external side of plasma membrane,kinase,tyrosine kinase
B74	KDR	VANDETANIB	n/a	TdgClinicalTrial	cell surface,clinically actionable,druggable genome,external side of plasma membrane,kinase,tyrosine kinase
B74	KDR	VATALANIB	inhibitor	MyCancerGenome	cell surface,clinically actionable,druggable genome,external side of plasma membrane,kinase,tyrosine kinase
B74	KDR	VATALANIB	inhibitor	TALC	cell surface,clinically actionable,druggable genome,external side of plasma membrane,kinase,tyrosine kinase
B74	KDR	VATALANIB	n/a	DrugBank	cell surface,clinically actionable,druggable genome,external side of plasma membrane,kinase,tyrosine kinase
B74	KDR	VATALANIB	n/a	TdgClinicalTrial	cell surface,clinically actionable,druggable genome,external side of plasma membrane,kinase,tyrosine kinase
B74	NOTCH3	RO4929097	other/unknown	MyCancerGenome	clinically actionable
W016	AKT1	AFURESERTIB HYDROCHLORIDE	n/a	ClearityFoundationClinicalTrial	clinically actionable,druggable genome,kinase,serine threonine kinase,tumor suppressor
W016	AKT1	AZD4547	inhibitor	MyCancerGenomeClinicalTrial	clinically actionable,druggable genome,kinase,serine threonine kinase,tumor suppressor
W016	AKT1	AZD5363	inhibitor	MyCancerGenome	clinically actionable,druggable genome,kinase,serine threonine kinase,tumor suppressor
W016	AKT1	AZD5363	n/a	ClearityFoundationClinicalTrial	clinically actionable,druggable genome,kinase,serine threonine kinase,tumor suppressor
W016	AKT1	GDC-0068	inhibitor	MyCancerGenome	clinically actionable,druggable genome,kinase,serine threonine kinase,tumor suppressor
W016	AKT1	GDC-0068	inhibitor	MyCancerGenomeClinicalTrial	clinically actionable,druggable genome,kinase,serine threonine kinase,tumor suppressor
W016	AKT1	GDC-0068	n/a	ClearityFoundationClinicalTrial	clinically actionable,druggable genome,kinase,serine threonine kinase,tumor suppressor
W016	AKT1	GDC-0068	n/a	TdgClinicalTrial	clinically actionable,druggable genome,kinase,serine threonine kinase,tumor suppressor
W016	AKT1	GSK2126458	inhibitor	MyCancerGenomeClinicalTrial	clinically actionable,druggable genome,kinase,serine threonine kinase,tumor suppressor
W016	AKT1	MK-2206	inhibitor	MyCancerGenome	clinically actionable,druggable genome,kinase,serine threonine kinase,tumor suppressor
W016	AKT1	MK-2206	n/a	TdgClinicalTrial	clinically actionable,druggable genome,kinase,serine threonine kinase,tumor suppressor
W016	AKT1	MK2206	inhibitor	MyCancerGenomeClinicalTrial	clinically actionable,druggable genome,kinase,serine threonine kinase,tumor suppressor
W016	AKT1	NELFINAVIR	inhibitor	TALC	clinically actionable,druggable genome,kinase,serine threonine kinase,tumor suppressor
W016	AKT1	PERIFOSINE	inhibitor	MyCancerGenomeClinicalTrial	clinically actionable,druggable genome,kinase,serine threonine kinase,tumor suppressor
W016	AKT1	PERIFOSINE	inhibitor	TALC	clinically actionable,druggable genome,kinase,serine threonine kinase,tumor suppressor
W016	AKT1	PERIFOSINE	n/a	TdgClinicalTrial	clinically actionable,druggable genome,kinase,serine threonine kinase,tumor suppressor
W016	AKT1	TRICIRIBINE	n/a	ClearityFoundationBiomarkers	clinically actionable,druggable genome,kinase,serine threonine kinase,tumor suppressor
W016	AKT1	TRICIRIBINE	n/a	ClearityFoundationClinicalTrial	clinically actionable,druggable genome,kinase,serine threonine kinase,tumor suppressor
W016	AKT1	TRICIRIBINE	n/a	TdgClinicalTrial	clinically actionable,druggable genome,kinase,serine threonine kinase,tumor suppressor
W016	AKT2	AFURESERTIB HYDROCHLORIDE	n/a	ClearityFoundationClinicalTrial	clinically actionable,druggable genome,kinase,serine threonine kinase,tumor suppressor
W016	AKT2	AZD4547	inhibitor	MyCancerGenomeClinicalTrial	clinically actionable,druggable genome,kinase,serine threonine kinase,tumor suppressor
W016	AKT2	AZD5363	n/a	ClearityFoundationClinicalTrial	clinically actionable,druggable genome,kinase,serine threonine kinase,tumor suppressor
W016	AKT2	GDC-0068	inhibitor	MyCancerGenomeClinicalTrial	clinically actionable,druggable genome,kinase,serine threonine kinase,tumor suppressor
W016	AKT2	GDC-0068	n/a	ClearityFoundationClinicalTrial	clinically actionable,druggable genome,kinase,serine threonine kinase,tumor suppressor
W016	AKT2	GDC-0068	n/a	TdgClinicalTrial	clinically actionable,druggable genome,kinase,serine threonine kinase,tumor suppressor
W016	AKT2	GSK2126458	inhibitor	MyCancerGenomeClinicalTrial	clinically actionable,druggable genome,kinase,serine threonine kinase,tumor suppressor
W016	AKT2	MK-2206	n/a	TdgClinicalTrial	clinically actionable,druggable genome,kinase,serine threonine kinase,tumor suppressor
W016	AKT2	MK2206	inhibitor	MyCancerGenomeClinicalTrial	clinically actionable,druggable genome,kinase,serine threonine kinase,tumor suppressor
W016	AKT2	PERIFOSINE	n/a	TdgClinicalTrial	clinically actionable,druggable genome,kinase,serine threonine kinase,tumor suppressor
W016	AKT2	TRICIRIBINE	n/a	ClearityFoundationClinicalTrial	clinically actionable,druggable genome,kinase,serine threonine kinase,tumor suppressor
W016	AKT2	TRICIRIBINE	n/a	TdgClinicalTrial	clinically actionable,druggable genome,kinase,serine threonine kinase,tumor suppressor
W016	AOX1	ENILURACIL	n/a	DrugBank
W016	AR	ARN-509	n/a	TdgClinicalTrial	clinically actionable,druggable genome,nuclear hormone receptor,transcription factor binding
W016	AR	BICALUTAMIDE	n/a	TEND	clinically actionable,druggable genome,nuclear hormone receptor,transcription factor binding
W016	AR	BICALUTAMIDE	n/a	TdgClinicalTrial	clinically actionable,druggable genome,nuclear hormone receptor,transcription factor binding
W016	AR	DROMOSTANOLONE	n/a	TEND	clinically actionable,druggable genome,nuclear hormone receptor,transcription factor binding
W016	AR	ENZALUTAMIDE	inhibitor	CancerCommons	clinically actionable,druggable genome,nuclear hormone receptor,transcription factor binding
W016	AR	ENZALUTAMIDE	inhibitor	DrugBank	clinically actionable,druggable genome,nuclear hormone receptor,transcription factor binding
W016	AR	FLUTAMIDE	antagonist	DrugBank	clinically actionable,druggable genome,nuclear hormone receptor,transcription factor binding
W016	AR	FLUTAMIDE	n/a	TEND	clinically actionable,druggable genome,nuclear hormone receptor,transcription factor binding
W016	AR	GALETERONE	n/a	TdgClinicalTrial	clinically actionable,druggable genome,nuclear hormone receptor,transcription factor binding
W016	AR	METHYLTESTOSTERONE	agonist	DrugBank	clinically actionable,druggable genome,nuclear hormone receptor,transcription factor binding
W016	AR	NILUTAMIDE	antagonist	DrugBank	clinically actionable,druggable genome,nuclear hormone receptor,transcription factor binding
W016	AR	NILUTAMIDE	n/a	TEND	clinically actionable,druggable genome,nuclear hormone receptor,transcription factor binding
W016	ATM	BMN673	n/a	ClearityFoundationBiomarkers	clinically actionable,dna repair,druggable genome,histone modification,kinase,phosphatidylinositol 3 kinase,serine threonine kinase,tumor suppressor
W016	ATM	OLAPARIB	n/a	ClearityFoundationBiomarkers	clinically actionable,dna repair,druggable genome,histone modification,kinase,phosphatidylinositol 3 kinase,serine threonine kinase,tumor suppressor
W016	ATM	RUCAPARIB	n/a	ClearityFoundationBiomarkers	clinically actionable,dna repair,druggable genome,histone modification,kinase,phosphatidylinositol 3 kinase,serine threonine kinase,tumor suppressor
W016	ATM	VELIPARIB	n/a	ClearityFoundationBiomarkers	clinically actionable,dna repair,druggable genome,histone modification,kinase,phosphatidylinositol 3 kinase,serine threonine kinase,tumor suppressor
W016	ATR	BMN673	n/a	ClearityFoundationBiomarkers	clinically actionable,dna repair,drug resistance,druggable genome,kinase,phosphatidylinositol 3 kinase,serine threonine kinase
W016	ATR	OLAPARIB	n/a	ClearityFoundationBiomarkers	clinically actionable,dna repair,drug resistance,druggable genome,kinase,phosphatidylinositol 3 kinase,serine threonine kinase
W016	ATR	RUCAPARIB	n/a	ClearityFoundationBiomarkers	clinically actionable,dna repair,drug resistance,druggable genome,kinase,phosphatidylinositol 3 kinase,serine threonine kinase
W016	ATR	VELIPARIB	n/a	ClearityFoundationBiomarkers	clinically actionable,dna repair,drug resistance,druggable genome,kinase,phosphatidylinositol 3 kinase,serine threonine kinase
W016	BRCA1	BMN673	n/a	ClearityFoundationBiomarkers	clinically actionable,dna repair,tumor suppressor
W016	BRCA1	CARBOPLATIN	n/a	ClearityFoundationBiomarkers	clinically actionable,dna repair,tumor suppressor
W016	BRCA1	OLAPARIB	n/a	ClearityFoundationBiomarkers	clinically actionable,dna repair,tumor suppressor
W016	BRCA1	RUCAPARIB	n/a	ClearityFoundationBiomarkers	clinically actionable,dna repair,tumor suppressor
W016	BRCA1	VELIPARIB	n/a	ClearityFoundationBiomarkers	clinically actionable,dna repair,tumor suppressor
W016	BRCA2	BMN673	n/a	ClearityFoundationBiomarkers	clinically actionable,dna repair,histone modification,tumor suppressor
W016	BRCA2	OLAPARIB	n/a	ClearityFoundationBiomarkers	clinically actionable,dna repair,histone modification,tumor suppressor
W016	BRCA2	RUCAPARIB	n/a	ClearityFoundationBiomarkers	clinically actionable,dna repair,histone modification,tumor suppressor
W016	BRCA2	VELIPARIB	n/a	ClearityFoundationBiomarkers	clinically actionable,dna repair,histone modification,tumor suppressor
W016	CA1	ELLAGIC ACID	inhibitor	DrugBank	druggable genome
W016	CA7	ELLAGIC ACID	inhibitor	DrugBank	druggable genome
W016	CCND1	LEE011	n/a	ClearityFoundationBiomarkers	clinically actionable,drug resistance,kinase,transcription factor binding,tumor suppressor
W016	CCND1	LY2835219	n/a	ClearityFoundationBiomarkers	clinically actionable,drug resistance,kinase,transcription factor binding,tumor suppressor
W016	EGFR	AEE 788	inhibitor	TALC	cell surface,clinically actionable,druggable genome,kinase,serine threonine kinase,tumor suppressor,tyrosine kinase
W016	EGFR	AFATINIB	inhibitor	MyCancerGenome	cell surface,clinically actionable,druggable genome,kinase,serine threonine kinase,tumor suppressor,tyrosine kinase
W016	EGFR	AFATINIB	inhibitor	MyCancerGenomeClinicalTrial	cell surface,clinically actionable,druggable genome,kinase,serine threonine kinase,tumor suppressor,tyrosine kinase
W016	EGFR	AFATINIB	inhibitor	TALC	cell surface,clinically actionable,druggable genome,kinase,serine threonine kinase,tumor suppressor,tyrosine kinase
W016	EGFR	AFATINIB	n/a	TdgClinicalTrial	cell surface,clinically actionable,druggable genome,kinase,serine threonine kinase,tumor suppressor,tyrosine kinase
W016	EGFR	AKOS004227608	n/a	ClearityFoundationClinicalTrial	cell surface,clinically actionable,druggable genome,kinase,serine threonine kinase,tumor suppressor,tyrosine kinase
W016	EGFR	AP26113	inhibitor	MyCancerGenomeClinicalTrial	cell surface,clinically actionable,druggable genome,kinase,serine threonine kinase,tumor suppressor,tyrosine kinase
W016	EGFR	AZD8931	inhibitor	MyCancerGenome	cell surface,clinically actionable,druggable genome,kinase,serine threonine kinase,tumor suppressor,tyrosine kinase
W016	EGFR	BMS-599626	inhibitor	MyCancerGenome	cell surface,clinically actionable,druggable genome,kinase,serine threonine kinase,tumor suppressor,tyrosine kinase
W016	EGFR	BMS-599626	inhibitor	TALC	cell surface,clinically actionable,druggable genome,kinase,serine threonine kinase,tumor suppressor,tyrosine kinase
W016	EGFR	BMS-690514	inhibitor	TALC	cell surface,clinically actionable,druggable genome,kinase,serine threonine kinase,tumor suppressor,tyrosine kinase
W016	EGFR	CO-1686	inhibitor	MyCancerGenome	cell surface,clinically actionable,druggable genome,kinase,serine threonine kinase,tumor suppressor,tyrosine kinase
W016	EGFR	CUDC-101	inhibitor	TALC	cell surface,clinically actionable,druggable genome,kinase,serine threonine kinase,tumor suppressor,tyrosine kinase
W016	EGFR	CUDC-101	n/a	TdgClinicalTrial	cell surface,clinically actionable,druggable genome,kinase,serine threonine kinase,tumor suppressor,tyrosine kinase
W016	EGFR	DACOMITINIB	inhibitor	MyCancerGenome	cell surface,clinically actionable,druggable genome,kinase,serine threonine kinase,tumor suppressor,tyrosine kinase
W016	EGFR	DACOMITINIB	inhibitor	MyCancerGenomeClinicalTrial	cell surface,clinically actionable,druggable genome,kinase,serine threonine kinase,tumor suppressor,tyrosine kinase
W016	EGFR	DACOMITINIB	inhibitor	TALC	cell surface,clinically actionable,druggable genome,kinase,serine threonine kinase,tumor suppressor,tyrosine kinase
W016	EGFR	DACOMITINIB	n/a	TdgClinicalTrial	cell surface,clinically actionable,druggable genome,kinase,serine threonine kinase,tumor suppressor,tyrosine kinase
W016	EGFR	ERLOTINIB	inhibitor	CancerCommons	cell surface,clinically actionable,druggable genome,kinase,serine threonine kinase,tumor suppressor,tyrosine kinase
W016	EGFR	ERLOTINIB	inhibitor	MyCancerGenome	cell surface,clinically actionable,druggable genome,kinase,serine threonine kinase,tumor suppressor,tyrosine kinase
W016	EGFR	ERLOTINIB	inhibitor	TALC	cell surface,clinically actionable,druggable genome,kinase,serine threonine kinase,tumor suppressor,tyrosine kinase
W016	EGFR	ERLOTINIB	n/a	ClearityFoundationBiomarkers	cell surface,clinically actionable,druggable genome,kinase,serine threonine kinase,tumor suppressor,tyrosine kinase
W016	EGFR	ERLOTINIB	n/a	ClearityFoundationClinicalTrial	cell surface,clinically actionable,druggable genome,kinase,serine threonine kinase,tumor suppressor,tyrosine kinase
W016	EGFR	ERLOTINIB	n/a	TEND	cell surface,clinically actionable,druggable genome,kinase,serine threonine kinase,tumor suppressor,tyrosine kinase
W016	EGFR	ERLOTINIB	n/a	TdgClinicalTrial	cell surface,clinically actionable,druggable genome,kinase,serine threonine kinase,tumor suppressor,tyrosine kinase
W016	EGFR	ERLOTINIB HYDROCHLORIDE	inhibitor	MyCancerGenomeClinicalTrial	cell surface,clinically actionable,druggable genome,kinase,serine threonine kinase,tumor suppressor,tyrosine kinase
W016	EGFR	GEFITINIB	inhibitor	MyCancerGenome	cell surface,clinically actionable,druggable genome,kinase,serine threonine kinase,tumor suppressor,tyrosine kinase
W016	EGFR	GEFITINIB	inhibitor	MyCancerGenomeClinicalTrial	cell surface,clinically actionable,druggable genome,kinase,serine threonine kinase,tumor suppressor,tyrosine kinase
W016	EGFR	GEFITINIB	inhibitor	TALC	cell surface,clinically actionable,druggable genome,kinase,serine threonine kinase,tumor suppressor,tyrosine kinase
W016	EGFR	GEFITINIB	n/a	ClearityFoundationBiomarkers	cell surface,clinically actionable,druggable genome,kinase,serine threonine kinase,tumor suppressor,tyrosine kinase
W016	EGFR	GEFITINIB	n/a	TEND	cell surface,clinically actionable,druggable genome,kinase,serine threonine kinase,tumor suppressor,tyrosine kinase
W016	EGFR	GEFITINIB	n/a	TdgClinicalTrial	cell surface,clinically actionable,druggable genome,kinase,serine threonine kinase,tumor suppressor,tyrosine kinase
W016	EGFR	ICOTINIB	inhibitor	MyCancerGenome	cell surface,clinically actionable,druggable genome,kinase,serine threonine kinase,tumor suppressor,tyrosine kinase
W016	EGFR	ICOTINIB	inhibitor	MyCancerGenomeClinicalTrial	cell surface,clinically actionable,druggable genome,kinase,serine threonine kinase,tumor suppressor,tyrosine kinase
W016	EGFR	ICOTINIB	inhibitor	TALC	cell surface,clinically actionable,druggable genome,kinase,serine threonine kinase,tumor suppressor,tyrosine kinase
W016	EGFR	LAPATINIB	inhibitor	CancerCommons	cell surface,clinically actionable,druggable genome,kinase,serine threonine kinase,tumor suppressor,tyrosine kinase
W016	EGFR	LAPATINIB	n/a	ClearityFoundationClinicalTrial	cell surface,clinically actionable,druggable genome,kinase,serine threonine kinase,tumor suppressor,tyrosine kinase
W016	EGFR	LAPATINIB	n/a	TEND	cell surface,clinically actionable,druggable genome,kinase,serine threonine kinase,tumor suppressor,tyrosine kinase
W016	EGFR	LAPATINIB	n/a	TdgClinicalTrial	cell surface,clinically actionable,druggable genome,kinase,serine threonine kinase,tumor suppressor,tyrosine kinase
W016	EGFR	LAPATINIB DITOSYLATE	inhibitor	MyCancerGenomeClinicalTrial	cell surface,clinically actionable,druggable genome,kinase,serine threonine kinase,tumor suppressor,tyrosine kinase
W016	EGFR	MOMELOTINIB	inhibitor	TALC	cell surface,clinically actionable,druggable genome,kinase,serine threonine kinase,tumor suppressor,tyrosine kinase
W016	EGFR	NERATINIB	inhibitor	TALC	cell surface,clinically actionable,druggable genome,kinase,serine threonine kinase,tumor suppressor,tyrosine kinase
W016	EGFR	NERATINIB	n/a	TdgClinicalTrial	cell surface,clinically actionable,druggable genome,kinase,serine threonine kinase,tumor suppressor,tyrosine kinase
W016	EGFR	PELITINIB	inhibitor	MyCancerGenome	cell surface,clinically actionable,druggable genome,kinase,serine threonine kinase,tumor suppressor,tyrosine kinase
W016	EGFR	PELITINIB	inhibitor	TALC	cell surface,clinically actionable,druggable genome,kinase,serine threonine kinase,tumor suppressor,tyrosine kinase
W016	EGFR	POZIOTINIB	inhibitor	MyCancerGenomeClinicalTrial	cell surface,clinically actionable,druggable genome,kinase,serine threonine kinase,tumor suppressor,tyrosine kinase
W016	EGFR	VANDETANIB	inhibitor	MyCancerGenome	cell surface,clinically actionable,druggable genome,kinase,serine threonine kinase,tumor suppressor,tyrosine kinase
W016	EGFR	VANDETANIB	inhibitor	MyCancerGenomeClinicalTrial	cell surface,clinically actionable,druggable genome,kinase,serine threonine kinase,tumor suppressor,tyrosine kinase
W016	EGFR	VANDETANIB	inhibitor	TALC	cell surface,clinically actionable,druggable genome,kinase,serine threonine kinase,tumor suppressor,tyrosine kinase
W016	EGFR	VANDETANIB	n/a	ClearityFoundationBiomarkers	cell surface,clinically actionable,druggable genome,kinase,serine threonine kinase,tumor suppressor,tyrosine kinase
W016	EGFR	VANDETANIB	n/a	ClearityFoundationClinicalTrial	cell surface,clinically actionable,druggable genome,kinase,serine threonine kinase,tumor suppressor,tyrosine kinase
W016	EGFR	VANDETANIB	n/a	TdgClinicalTrial	cell surface,clinically actionable,druggable genome,kinase,serine threonine kinase,tumor suppressor,tyrosine kinase
W016	ERBB4	BMS-599626	inhibitor	MyCancerGenome	clinically actionable,druggable genome,kinase,tyrosine kinase
W016	ERBB4	BMS-599626	inhibitor	TALC	clinically actionable,druggable genome,kinase,tyrosine kinase
W016	ERBB4	DACOMITINIB	inhibitor	MyCancerGenome	clinically actionable,druggable genome,kinase,tyrosine kinase
W016	ERBB4	DACOMITINIB	inhibitor	MyCancerGenomeClinicalTrial	clinically actionable,druggable genome,kinase,tyrosine kinase
W016	ERBB4	DACOMITINIB	n/a	TdgClinicalTrial	clinically actionable,druggable genome,kinase,tyrosine kinase
W016	ERBB4	GEFITINIB	inhibitor	MyCancerGenomeClinicalTrial	clinically actionable,druggable genome,kinase,tyrosine kinase
W016	ERBB4	PELITINIB	inhibitor	MyCancerGenome	clinically actionable,druggable genome,kinase,tyrosine kinase
W016	ERBB4	PELITINIB	inhibitor	TALC	clinically actionable,druggable genome,kinase,tyrosine kinase
W016	ERBB4	POZIOTINIB	inhibitor	MyCancerGenomeClinicalTrial	clinically actionable,druggable genome,kinase,tyrosine kinase
W016	FGFR2	AZD4547	inhibitor	MyCancerGenomeClinicalTrial	cell surface,clinically actionable,druggable genome,kinase,tumor suppressor,tyrosine kinase
W016	FGFR2	BRIVANIB	inhibitor	TALC	cell surface,clinically actionable,druggable genome,kinase,tumor suppressor,tyrosine kinase
W016	FGFR2	DOVITINIB	inhibitor	TALC	cell surface,clinically actionable,druggable genome,kinase,tumor suppressor,tyrosine kinase
W016	FGFR2	DOVITINIB	n/a	ClearityFoundationClinicalTrial	cell surface,clinically actionable,druggable genome,kinase,tumor suppressor,tyrosine kinase
W016	FGFR2	DOVITINIB	n/a	TdgClinicalTrial	cell surface,clinically actionable,druggable genome,kinase,tumor suppressor,tyrosine kinase
W016	FGFR2	ENMD-2076	n/a	ClearityFoundationClinicalTrial	cell surface,clinically actionable,druggable genome,kinase,tumor suppressor,tyrosine kinase
W016	FGFR2	ENMD-2076	n/a	TdgClinicalTrial	cell surface,clinically actionable,druggable genome,kinase,tumor suppressor,tyrosine kinase
W016	FGFR2	LENVATINIB	inhibitor	TALC	cell surface,clinically actionable,druggable genome,kinase,tumor suppressor,tyrosine kinase
W016	FGFR2	MASITINIB	inhibitor	MyCancerGenome	cell surface,clinically actionable,druggable genome,kinase,tumor suppressor,tyrosine kinase
W016	FGFR2	NINTEDANIB	inhibitor	MyCancerGenome	cell surface,clinically actionable,druggable genome,kinase,tumor suppressor,tyrosine kinase
W016	FGFR2	NINTEDANIB	n/a	ClearityFoundationClinicalTrial	cell surface,clinically actionable,druggable genome,kinase,tumor suppressor,tyrosine kinase
W016	FGFR2	NINTEDANIB	n/a	TdgClinicalTrial	cell surface,clinically actionable,druggable genome,kinase,tumor suppressor,tyrosine kinase
W016	FGFR2	PONATINIB	inhibitor	MyCancerGenome	cell surface,clinically actionable,druggable genome,kinase,tumor suppressor,tyrosine kinase
W016	FGFR2	PONATINIB	inhibitor	TALC	cell surface,clinically actionable,druggable genome,kinase,tumor suppressor,tyrosine kinase
W016	FGFR2	REGORAFENIB	inhibitor	DrugBank	cell surface,clinically actionable,druggable genome,kinase,tumor suppressor,tyrosine kinase
W016	FGFR2	REGORAFENIB	inhibitor	MyCancerGenomeClinicalTrial	cell surface,clinically actionable,druggable genome,kinase,tumor suppressor,tyrosine kinase
W016	FGFR2	REGORAFENIB	inhibitor	TALC	cell surface,clinically actionable,druggable genome,kinase,tumor suppressor,tyrosine kinase
W016	FGFR2	THALIDOMIDE	n/a	TdgClinicalTrial	cell surface,clinically actionable,druggable genome,kinase,tumor suppressor,tyrosine kinase
W016	FGFR2	TSU-68	inhibitor	TALC	cell surface,clinically actionable,druggable genome,kinase,tumor suppressor,tyrosine kinase
W016	FGFR3	DOVITINIB	inhibitor	CancerCommons	clinically actionable,druggable genome,kinase,tumor suppressor,tyrosine kinase
W016	FGFR3	DOVITINIB	inhibitor	TALC	clinically actionable,druggable genome,kinase,tumor suppressor,tyrosine kinase
W016	FGFR3	DOVITINIB	n/a	ClearityFoundationClinicalTrial	clinically actionable,druggable genome,kinase,tumor suppressor,tyrosine kinase
W016	FGFR3	DOVITINIB	n/a	TdgClinicalTrial	clinically actionable,druggable genome,kinase,tumor suppressor,tyrosine kinase
W016	FGFR3	ENMD-2076	inhibitor	MyCancerGenome	clinically actionable,druggable genome,kinase,tumor suppressor,tyrosine kinase
W016	FGFR3	ENMD-2076	n/a	ClearityFoundationClinicalTrial	clinically actionable,druggable genome,kinase,tumor suppressor,tyrosine kinase
W016	FGFR3	MASITINIB	inhibitor	MyCancerGenome	clinically actionable,druggable genome,kinase,tumor suppressor,tyrosine kinase
W016	FGFR3	MASITINIB	inhibitor	MyCancerGenomeClinicalTrial	clinically actionable,druggable genome,kinase,tumor suppressor,tyrosine kinase
W016	FGFR3	NINTEDANIB	inhibitor	MyCancerGenome	clinically actionable,druggable genome,kinase,tumor suppressor,tyrosine kinase
W016	FGFR3	NINTEDANIB	n/a	ClearityFoundationClinicalTrial	clinically actionable,druggable genome,kinase,tumor suppressor,tyrosine kinase
W016	FGFR3	NINTEDANIB	n/a	TdgClinicalTrial	clinically actionable,druggable genome,kinase,tumor suppressor,tyrosine kinase
W016	FGFR3	PONATINIB	inhibitor	MyCancerGenome	clinically actionable,druggable genome,kinase,tumor suppressor,tyrosine kinase
W016	FGFR3	PONATINIB	inhibitor	TALC	clinically actionable,druggable genome,kinase,tumor suppressor,tyrosine kinase
W016	FLT3	4SC-202	n/a	TdgClinicalTrial	cell surface,clinically actionable,druggable genome,external side of plasma membrane,kinase,tyrosine kinase
W016	FLT3	AMUVATINIB	inhibitor	MyCancerGenome	cell surface,clinically actionable,druggable genome,external side of plasma membrane,kinase,tyrosine kinase
W016	FLT3	AMUVATINIB	inhibitor	TALC	cell surface,clinically actionable,druggable genome,external side of plasma membrane,kinase,tyrosine kinase
W016	FLT3	AMUVATINIB	n/a	TdgClinicalTrial	cell surface,clinically actionable,druggable genome,external side of plasma membrane,kinase,tyrosine kinase
W016	FLT3	BORTEZOMIB	inhibitor	MyCancerGenomeClinicalTrial	cell surface,clinically actionable,druggable genome,external side of plasma membrane,kinase,tyrosine kinase
W016	FLT3	CABOZANTINIB	inhibitor	MyCancerGenome	cell surface,clinically actionable,druggable genome,external side of plasma membrane,kinase,tyrosine kinase
W016	FLT3	CLOFARABINE	inhibitor	MyCancerGenomeClinicalTrial	cell surface,clinically actionable,druggable genome,external side of plasma membrane,kinase,tyrosine kinase
W016	FLT3	CRENOLANIB	inhibitor	MyCancerGenomeClinicalTrial	cell surface,clinically actionable,druggable genome,external side of plasma membrane,kinase,tyrosine kinase
W016	FLT3	ENMD-2076	n/a	TdgClinicalTrial	cell surface,clinically actionable,druggable genome,external side of plasma membrane,kinase,tyrosine kinase
W016	FLT3	LESTAURTINIB	inhibitor	MyCancerGenome	cell surface,clinically actionable,druggable genome,external side of plasma membrane,kinase,tyrosine kinase
W016	FLT3	LESTAURTINIB	n/a	TdgClinicalTrial	cell surface,clinically actionable,druggable genome,external side of plasma membrane,kinase,tyrosine kinase
W016	FLT3	LINIFANIB	n/a	TdgClinicalTrial	cell surface,clinically actionable,druggable genome,external side of plasma membrane,kinase,tyrosine kinase
W016	FLT3	MIDOSTAURIN	inhibitor	MyCancerGenome	cell surface,clinically actionable,druggable genome,external side of plasma membrane,kinase,tyrosine kinase
W016	FLT3	MIDOSTAURIN	n/a	TdgClinicalTrial	cell surface,clinically actionable,druggable genome,external side of plasma membrane,kinase,tyrosine kinase
W016	FLT3	PONATINIB	inhibitor	MyCancerGenome	cell surface,clinically actionable,druggable genome,external side of plasma membrane,kinase,tyrosine kinase
W016	FLT3	QUIZARTINIB	inhibitor	MyCancerGenome	cell surface,clinically actionable,druggable genome,external side of plasma membrane,kinase,tyrosine kinase
W016	FLT3	QUIZARTINIB	n/a	TdgClinicalTrial	cell surface,clinically actionable,druggable genome,external side of plasma membrane,kinase,tyrosine kinase
W016	FLT3	SORAFENIB	antagonist	DrugBank	cell surface,clinically actionable,druggable genome,external side of plasma membrane,kinase,tyrosine kinase
W016	FLT3	SORAFENIB	inhibitor	TALC	cell surface,clinically actionable,druggable genome,external side of plasma membrane,kinase,tyrosine kinase
W016	FLT3	SORAFENIB	n/a	TEND	cell surface,clinically actionable,druggable genome,external side of plasma membrane,kinase,tyrosine kinase
W016	FLT3	SORAFENIB	n/a	TdgClinicalTrial	cell surface,clinically actionable,druggable genome,external side of plasma membrane,kinase,tyrosine kinase
W016	FLT3	SORAFENIB TOSYLATE	inhibitor	MyCancerGenomeClinicalTrial	cell surface,clinically actionable,druggable genome,external side of plasma membrane,kinase,tyrosine kinase
W016	FLT3	SUNITINIB	inhibitor	MyCancerGenomeClinicalTrial	cell surface,clinically actionable,druggable genome,external side of plasma membrane,kinase,tyrosine kinase
W016	FLT3	SUNITINIB	inhibitor	TALC	cell surface,clinically actionable,druggable genome,external side of plasma membrane,kinase,tyrosine kinase
W016	FLT3	SUNITINIB	n/a	TEND	cell surface,clinically actionable,druggable genome,external side of plasma membrane,kinase,tyrosine kinase
W016	FLT3	SUNITINIB	n/a	TdgClinicalTrial	cell surface,clinically actionable,druggable genome,external side of plasma membrane,kinase,tyrosine kinase
W016	FLT3	TANDUTINIB	inhibitor	MyCancerGenome	cell surface,clinically actionable,druggable genome,external side of plasma membrane,kinase,tyrosine kinase
W016	FLT3	TANDUTINIB	n/a	TdgClinicalTrial	cell surface,clinically actionable,druggable genome,external side of plasma membrane,kinase,tyrosine kinase
W016	GRIA1	TALAMPANEL	n/a	DrugBank	cell surface,druggable genome,ion channel,transporter
W016	GRIA2	TALAMPANEL	n/a	DrugBank	druggable genome,ion channel,transporter
W016	HSP90AB1	ALVESPIMYCIN	n/a	TdgClinicalTrial	cell surface,druggable genome
W016	HSP90AB1	AT13387	n/a	TdgClinicalTrial	cell surface,druggable genome
W016	HSP90AB1	CNF1010	n/a	TdgClinicalTrial	cell surface,druggable genome
W016	HSP90AB1	GANETESPIB	n/a	TdgClinicalTrial	cell surface,druggable genome
W016	HSP90AB1	GANETESPIB	other/unknown	MyCancerGenome	cell surface,druggable genome
W016	HSP90AB1	IPI-504	n/a	TdgClinicalTrial	cell surface,druggable genome
W016	HSP90AB1	MPC-3100	n/a	TdgClinicalTrial	cell surface,druggable genome
W016	HSP90AB1	RETASPIMYCIN	n/a	TdgClinicalTrial	cell surface,druggable genome
W016	HSP90AB1	SNX-5422	n/a	TdgClinicalTrial	cell surface,druggable genome
W016	HSP90AB1	TANESPIMYCIN	n/a	TdgClinicalTrial	cell surface,druggable genome
W016	IPO4	MKC-1	n/a	TdgClinicalTrial
W016	KIT	AMUVATINIB	inhibitor	MyCancerGenome	cell surface,clinically actionable,druggable genome,external side of plasma membrane,kinase,tyrosine kinase
W016	KIT	AMUVATINIB	inhibitor	TALC	cell surface,clinically actionable,druggable genome,external side of plasma membrane,kinase,tyrosine kinase
W016	KIT	AMUVATINIB	n/a	TdgClinicalTrial	cell surface,clinically actionable,druggable genome,external side of plasma membrane,kinase,tyrosine kinase
W016	KIT	AXITINIB	inhibitor	CancerCommons	cell surface,clinically actionable,druggable genome,external side of plasma membrane,kinase,tyrosine kinase
W016	KIT	AXITINIB	inhibitor	MyCancerGenome	cell surface,clinically actionable,druggable genome,external side of plasma membrane,kinase,tyrosine kinase
W016	KIT	AXITINIB	inhibitor	TALC	cell surface,clinically actionable,druggable genome,external side of plasma membrane,kinase,tyrosine kinase
W016	KIT	AXITINIB	n/a	TdgClinicalTrial	cell surface,clinically actionable,druggable genome,external side of plasma membrane,kinase,tyrosine kinase
W016	KIT	CABOZANTINIB	inhibitor	MyCancerGenome	cell surface,clinically actionable,druggable genome,external side of plasma membrane,kinase,tyrosine kinase
W016	KIT	CEDIRANIB	inhibitor	TALC	cell surface,clinically actionable,druggable genome,external side of plasma membrane,kinase,tyrosine kinase
W016	KIT	DASATINIB	inhibitor	CancerCommons	cell surface,clinically actionable,druggable genome,external side of plasma membrane,kinase,tyrosine kinase
W016	KIT	DASATINIB	inhibitor	MyCancerGenomeClinicalTrial	cell surface,clinically actionable,druggable genome,external side of plasma membrane,kinase,tyrosine kinase
W016	KIT	DASATINIB	inhibitor	TALC	cell surface,clinically actionable,druggable genome,external side of plasma membrane,kinase,tyrosine kinase
W016	KIT	DASATINIB	n/a	TEND	cell surface,clinically actionable,druggable genome,external side of plasma membrane,kinase,tyrosine kinase
W016	KIT	DASATINIB	n/a	TdgClinicalTrial	cell surface,clinically actionable,druggable genome,external side of plasma membrane,kinase,tyrosine kinase
W016	KIT	DOVITINIB	n/a	ClearityFoundationClinicalTrial	cell surface,clinically actionable,druggable genome,external side of plasma membrane,kinase,tyrosine kinase
W016	KIT	ENMD-2076	n/a	TdgClinicalTrial	cell surface,clinically actionable,druggable genome,external side of plasma membrane,kinase,tyrosine kinase
W016	KIT	IMATINIB	inhibitor	MyCancerGenome	cell surface,clinically actionable,druggable genome,external side of plasma membrane,kinase,tyrosine kinase
W016	KIT	IMATINIB	inhibitor	TALC	cell surface,clinically actionable,druggable genome,external side of plasma membrane,kinase,tyrosine kinase
W016	KIT	IMATINIB	multitarget,antagonist	DrugBank	cell surface,clinically actionable,druggable genome,external side of plasma membrane,kinase,tyrosine kinase
W016	KIT	IMATINIB	n/a	TEND	cell surface,clinically actionable,druggable genome,external side of plasma membrane,kinase,tyrosine kinase
W016	KIT	IMATINIB	n/a	TdgClinicalTrial	cell surface,clinically actionable,druggable genome,external side of plasma membrane,kinase,tyrosine kinase
W016	KIT	IMATINIB MESYLATE	inhibitor	MyCancerGenomeClinicalTrial	cell surface,clinically actionable,druggable genome,external side of plasma membrane,kinase,tyrosine kinase
W016	KIT	LENVATINIB	n/a	TdgClinicalTrial	cell surface,clinically actionable,druggable genome,external side of plasma membrane,kinase,tyrosine kinase
W016	KIT	LINIFANIB	n/a	TdgClinicalTrial	cell surface,clinically actionable,druggable genome,external side of plasma membrane,kinase,tyrosine kinase
W016	KIT	MASITINIB	inhibitor	CancerCommons	cell surface,clinically actionable,druggable genome,external side of plasma membrane,kinase,tyrosine kinase
W016	KIT	MASITINIB	inhibitor	MyCancerGenome	cell surface,clinically actionable,druggable genome,external side of plasma membrane,kinase,tyrosine kinase
W016	KIT	MASITINIB	inhibitor	MyCancerGenomeClinicalTrial	cell surface,clinically actionable,druggable genome,external side of plasma membrane,kinase,tyrosine kinase
W016	KIT	MIDOSTAURIN	inhibitor	MyCancerGenome	cell surface,clinically actionable,druggable genome,external side of plasma membrane,kinase,tyrosine kinase
W016	KIT	MOTESANIB	inhibitor	MyCancerGenome	cell surface,clinically actionable,druggable genome,external side of plasma membrane,kinase,tyrosine kinase
W016	KIT	MOTESANIB	inhibitor	TALC	cell surface,clinically actionable,druggable genome,external side of plasma membrane,kinase,tyrosine kinase
W016	KIT	MOTESANIB	n/a	TdgClinicalTrial	cell surface,clinically actionable,druggable genome,external side of plasma membrane,kinase,tyrosine kinase
W016	KIT	NILOTINIB	antagonist	DrugBank	cell surface,clinically actionable,druggable genome,external side of plasma membrane,kinase,tyrosine kinase
W016	KIT	NILOTINIB	inhibitor	CancerCommons	cell surface,clinically actionable,druggable genome,external side of plasma membrane,kinase,tyrosine kinase
W016	KIT	NILOTINIB	inhibitor	MyCancerGenomeClinicalTrial	cell surface,clinically actionable,druggable genome,external side of plasma membrane,kinase,tyrosine kinase
W016	KIT	PAZOPANIB	inhibitor	MyCancerGenome	cell surface,clinically actionable,druggable genome,external side of plasma membrane,kinase,tyrosine kinase
W016	KIT	PAZOPANIB	inhibitor	MyCancerGenomeClinicalTrial	cell surface,clinically actionable,druggable genome,external side of plasma membrane,kinase,tyrosine kinase
W016	KIT	PAZOPANIB	inhibitor	TALC	cell surface,clinically actionable,druggable genome,external side of plasma membrane,kinase,tyrosine kinase
W016	KIT	REGORAFENIB	inhibitor	DrugBank	cell surface,clinically actionable,druggable genome,external side of plasma membrane,kinase,tyrosine kinase
W016	KIT	REGORAFENIB	inhibitor	MyCancerGenome	cell surface,clinically actionable,druggable genome,external side of plasma membrane,kinase,tyrosine kinase
W016	KIT	REGORAFENIB	inhibitor	MyCancerGenomeClinicalTrial	cell surface,clinically actionable,druggable genome,external side of plasma membrane,kinase,tyrosine kinase
W016	KIT	REGORAFENIB	inhibitor	TALC	cell surface,clinically actionable,druggable genome,external side of plasma membrane,kinase,tyrosine kinase
W016	KIT	SORAFENIB	antagonist	DrugBank	cell surface,clinically actionable,druggable genome,external side of plasma membrane,kinase,tyrosine kinase
W016	KIT	SORAFENIB	inhibitor	TALC	cell surface,clinically actionable,druggable genome,external side of plasma membrane,kinase,tyrosine kinase
W016	KIT	SORAFENIB	n/a	TEND	cell surface,clinically actionable,druggable genome,external side of plasma membrane,kinase,tyrosine kinase
W016	KIT	SORAFENIB	n/a	TdgClinicalTrial	cell surface,clinically actionable,druggable genome,external side of plasma membrane,kinase,tyrosine kinase
W016	KIT	SUNITINIB	inhibitor	MyCancerGenomeClinicalTrial	cell surface,clinically actionable,druggable genome,external side of plasma membrane,kinase,tyrosine kinase
W016	KIT	SUNITINIB	inhibitor	TALC	cell surface,clinically actionable,druggable genome,external side of plasma membrane,kinase,tyrosine kinase
W016	KIT	SUNITINIB	n/a	TEND	cell surface,clinically actionable,druggable genome,external side of plasma membrane,kinase,tyrosine kinase
W016	KIT	SUNITINIB	n/a	TdgClinicalTrial	cell surface,clinically actionable,druggable genome,external side of plasma membrane,kinase,tyrosine kinase
W016	KIT	TANDUTINIB	inhibitor	MyCancerGenome	cell surface,clinically actionable,druggable genome,external side of plasma membrane,kinase,tyrosine kinase
W016	KIT	TELATINIB	inhibitor	MyCancerGenome	cell surface,clinically actionable,druggable genome,external side of plasma membrane,kinase,tyrosine kinase
W016	KIT	TELATINIB	inhibitor	TALC	cell surface,clinically actionable,druggable genome,external side of plasma membrane,kinase,tyrosine kinase
W016	KIT	VATALANIB	inhibitor	TALC	cell surface,clinically actionable,druggable genome,external side of plasma membrane,kinase,tyrosine kinase
W016	KIT	VATALANIB	n/a	TdgClinicalTrial	cell surface,clinically actionable,druggable genome,external side of plasma membrane,kinase,tyrosine kinase
W016	KRAS	ERLOTINIB	n/a	ClearityFoundationBiomarkers	clinically actionable
W016	KRAS	EVEROLIMUS	n/a	ClearityFoundationBiomarkers	clinically actionable
W016	KRAS	GEFITINIB	n/a	ClearityFoundationBiomarkers	clinically actionable
W016	KRAS	PIMASERTIB	n/a	ClearityFoundationBiomarkers	clinically actionable
W016	KRAS	REGORAFENIB	inhibitor	MyCancerGenomeClinicalTrial	clinically actionable
W016	KRAS	SELUMETINIB	inhibitor	MyCancerGenomeClinicalTrial	clinically actionable
W016	KRAS	SELUMETINIB	n/a	ClearityFoundationBiomarkers	clinically actionable
W016	KRAS	TEMSIROLIMUS	n/a	ClearityFoundationBiomarkers	clinically actionable
W016	KRAS	TRAMETINIB	n/a	ClearityFoundationBiomarkers	clinically actionable
W016	KRAS	VANDETANIB	n/a	ClearityFoundationBiomarkers	clinically actionable
W016	LDLR	PORFIMER	other/unknown	DrugBank	cell surface,external side of plasma membrane
W016	MAP2	DOCETAXEL	n/a	DrugBank
W016	MAP2	ESTRAMUSTINE	antagonist	DrugBank
W016	MAP2	PACLITAXEL	n/a	DrugBank
W016	MAP4	DOCETAXEL	n/a	DrugBank
W016	MAP4	PACLITAXEL	n/a	DrugBank
W016	MMP8	BATIMASTAT	n/a	DrugBank	druggable genome,neutral zinc metallopeptidase,protease
W016	MTOR	AZD8055	inhibitor	MyCancerGenome	clinically actionable,dna repair,druggable genome,kinase,phosphatidylinositol 3 kinase,serine threonine kinase,transcription factor binding,tumor suppressor
W016	MTOR	DEFOROLIMUS	n/a	ClearityFoundationClinicalTrial	clinically actionable,dna repair,druggable genome,kinase,phosphatidylinositol 3 kinase,serine threonine kinase,transcription factor binding,tumor suppressor
W016	MTOR	GDC-0980	inhibitor	MyCancerGenome	clinically actionable,dna repair,druggable genome,kinase,phosphatidylinositol 3 kinase,serine threonine kinase,transcription factor binding,tumor suppressor
W016	MTOR	METFORMIN	inhibitor	MyCancerGenomeClinicalTrial	clinically actionable,dna repair,druggable genome,kinase,phosphatidylinositol 3 kinase,serine threonine kinase,transcription factor binding,tumor suppressor
W016	MTOR	NVP-BGT226	inhibitor	TALC	clinically actionable,dna repair,druggable genome,kinase,phosphatidylinositol 3 kinase,serine threonine kinase,transcription factor binding,tumor suppressor
W016	MTOR	OSI-027	inhibitor	MyCancerGenome	clinically actionable,dna repair,druggable genome,kinase,phosphatidylinositol 3 kinase,serine threonine kinase,transcription factor binding,tumor suppressor
W016	MTOR	OSI-027	n/a	TdgClinicalTrial	clinically actionable,dna repair,druggable genome,kinase,phosphatidylinositol 3 kinase,serine threonine kinase,transcription factor binding,tumor suppressor
W016	MTOR	PI-103	inhibitor	MyCancerGenome	clinically actionable,dna repair,druggable genome,kinase,phosphatidylinositol 3 kinase,serine threonine kinase,transcription factor binding,tumor suppressor
W016	MTOR	PKI-587	inhibitor	MyCancerGenome	clinically actionable,dna repair,druggable genome,kinase,phosphatidylinositol 3 kinase,serine threonine kinase,transcription factor binding,tumor suppressor
W016	MTOR	PKI-587	inhibitor	MyCancerGenomeClinicalTrial	clinically actionable,dna repair,druggable genome,kinase,phosphatidylinositol 3 kinase,serine threonine kinase,transcription factor binding,tumor suppressor
W016	MTOR	RIDAFOROLIMUS	inhibitor	TALC	clinically actionable,dna repair,druggable genome,kinase,phosphatidylinositol 3 kinase,serine threonine kinase,transcription factor binding,tumor suppressor
W016	MTOR	RIDAFOROLIMUS	n/a	TdgClinicalTrial	clinically actionable,dna repair,druggable genome,kinase,phosphatidylinositol 3 kinase,serine threonine kinase,transcription factor binding,tumor suppressor
W016	MTOR	SF1126	inhibitor	MyCancerGenome	clinically actionable,dna repair,druggable genome,kinase,phosphatidylinositol 3 kinase,serine threonine kinase,transcription factor binding,tumor suppressor
W016	MTOR	SF1126	n/a	DrugBank	clinically actionable,dna repair,druggable genome,kinase,phosphatidylinositol 3 kinase,serine threonine kinase,transcription factor binding,tumor suppressor
W016	MTOR	SF1126	n/a	TdgClinicalTrial	clinically actionable,dna repair,druggable genome,kinase,phosphatidylinositol 3 kinase,serine threonine kinase,transcription factor binding,tumor suppressor
W016	MTOR	SIROLIMUS	inhibitor	DrugBank	clinically actionable,dna repair,druggable genome,kinase,phosphatidylinositol 3 kinase,serine threonine kinase,transcription factor binding,tumor suppressor
W016	MTOR	SIROLIMUS	n/a	ClearityFoundationClinicalTrial	clinically actionable,dna repair,druggable genome,kinase,phosphatidylinositol 3 kinase,serine threonine kinase,transcription factor binding,tumor suppressor
W016	MTOR	TEMSIROLIMUS	inhibitor	CancerCommons	clinically actionable,dna repair,druggable genome,kinase,phosphatidylinositol 3 kinase,serine threonine kinase,transcription factor binding,tumor suppressor
W016	MTOR	TEMSIROLIMUS	inhibitor	MyCancerGenome	clinically actionable,dna repair,druggable genome,kinase,phosphatidylinositol 3 kinase,serine threonine kinase,transcription factor binding,tumor suppressor
W016	MTOR	TEMSIROLIMUS	inhibitor	MyCancerGenomeClinicalTrial	clinically actionable,dna repair,druggable genome,kinase,phosphatidylinositol 3 kinase,serine threonine kinase,transcription factor binding,tumor suppressor
W016	MTOR	TEMSIROLIMUS	n/a	ClearityFoundationClinicalTrial	clinically actionable,dna repair,druggable genome,kinase,phosphatidylinositol 3 kinase,serine threonine kinase,transcription factor binding,tumor suppressor
W016	MTOR	TEMSIROLIMUS	n/a	TEND	clinically actionable,dna repair,druggable genome,kinase,phosphatidylinositol 3 kinase,serine threonine kinase,transcription factor binding,tumor suppressor
W016	MTOR	TEMSIROLIMUS	n/a	TdgClinicalTrial	clinically actionable,dna repair,druggable genome,kinase,phosphatidylinositol 3 kinase,serine threonine kinase,transcription factor binding,tumor suppressor
W016	MTOR	XL765	inhibitor	CancerCommons	clinically actionable,dna repair,druggable genome,kinase,phosphatidylinositol 3 kinase,serine threonine kinase,transcription factor binding,tumor suppressor
W016	MTOR	XL765	inhibitor	TALC	clinically actionable,dna repair,druggable genome,kinase,phosphatidylinositol 3 kinase,serine threonine kinase,transcription factor binding,tumor suppressor
W016	MTOR	XL765	n/a	DrugBank	clinically actionable,dna repair,druggable genome,kinase,phosphatidylinositol 3 kinase,serine threonine kinase,transcription factor binding,tumor suppressor
W016	MTOR	XL765	n/a	TdgClinicalTrial	clinically actionable,dna repair,druggable genome,kinase,phosphatidylinositol 3 kinase,serine threonine kinase,transcription factor binding,tumor suppressor
W016	NF1	PIMASERTIB	n/a	ClearityFoundationBiomarkers	clinically actionable
W016	NF1	SELUMETINIB	n/a	ClearityFoundationBiomarkers	clinically actionable
W016	NF1	TRAMETINIB	n/a	ClearityFoundationBiomarkers	clinically actionable
W016	NOTCH1	RO4929097	inhibitor	CancerCommons	cell surface,clinically actionable
W016	NOTCH1	RO4929097	other/unknown	MyCancerGenome	cell surface,clinically actionable
W016	PDGFRA	AMUVATINIB	inhibitor	MyCancerGenome	clinically actionable,druggable genome,kinase,tyrosine kinase
W016	PDGFRA	AMUVATINIB	n/a	TdgClinicalTrial	clinically actionable,druggable genome,kinase,tyrosine kinase
W016	PDGFRA	AXITINIB	n/a	TdgClinicalTrial	clinically actionable,druggable genome,kinase,tyrosine kinase
W016	PDGFRA	CRENOLANIB	inhibitor	MyCancerGenome	clinically actionable,druggable genome,kinase,tyrosine kinase
W016	PDGFRA	DOVITINIB	n/a	ClearityFoundationClinicalTrial	clinically actionable,druggable genome,kinase,tyrosine kinase
W016	PDGFRA	ENMD-2076	n/a	TdgClinicalTrial	clinically actionable,druggable genome,kinase,tyrosine kinase
W016	PDGFRA	IMATINIB	antagonist	DrugBank	clinically actionable,druggable genome,kinase,tyrosine kinase
W016	PDGFRA	IMATINIB	n/a	TEND	clinically actionable,druggable genome,kinase,tyrosine kinase
W016	PDGFRA	IMATINIB	n/a	TdgClinicalTrial	clinically actionable,druggable genome,kinase,tyrosine kinase
W016	PDGFRA	LENVATINIB	n/a	TdgClinicalTrial	clinically actionable,druggable genome,kinase,tyrosine kinase
W016	PDGFRA	MASITINIB	inhibitor	MyCancerGenomeClinicalTrial	clinically actionable,druggable genome,kinase,tyrosine kinase
W016	PDGFRA	MIDOSTAURIN	inhibitor	MyCancerGenome	clinically actionable,druggable genome,kinase,tyrosine kinase
W016	PDGFRA	MOTESANIB	inhibitor	MyCancerGenome	clinically actionable,druggable genome,kinase,tyrosine kinase
W016	PDGFRA	MOTESANIB	n/a	TdgClinicalTrial	clinically actionable,druggable genome,kinase,tyrosine kinase
W016	PDGFRA	NILOTINIB	inhibitor	MyCancerGenomeClinicalTrial	clinically actionable,druggable genome,kinase,tyrosine kinase
W016	PDGFRA	NINTEDANIB	inhibitor	MyCancerGenome	clinically actionable,druggable genome,kinase,tyrosine kinase
W016	PDGFRA	NINTEDANIB	n/a	ClearityFoundationClinicalTrial	clinically actionable,druggable genome,kinase,tyrosine kinase
W016	PDGFRA	NINTEDANIB	n/a	TdgClinicalTrial	clinically actionable,druggable genome,kinase,tyrosine kinase
W016	PDGFRA	PAZOPANIB	inhibitor	MyCancerGenome	clinically actionable,druggable genome,kinase,tyrosine kinase
W016	PDGFRA	PAZOPANIB	inhibitor	MyCancerGenomeClinicalTrial	clinically actionable,druggable genome,kinase,tyrosine kinase
W016	PDGFRA	PAZOPANIB	inhibitor	TALC	clinically actionable,druggable genome,kinase,tyrosine kinase
W016	PDGFRA	REGORAFENIB	inhibitor	DrugBank	clinically actionable,druggable genome,kinase,tyrosine kinase
W016	PDGFRA	REGORAFENIB	inhibitor	MyCancerGenomeClinicalTrial	clinically actionable,druggable genome,kinase,tyrosine kinase
W016	PDGFRA	SORAFENIB	inhibitor	MyCancerGenomeClinicalTrial	clinically actionable,druggable genome,kinase,tyrosine kinase
W016	PDGFRA	SORAFENIB TOSYLATE	inhibitor	MyCancerGenomeClinicalTrial	clinically actionable,druggable genome,kinase,tyrosine kinase
W016	PDGFRA	SUNITINIB	inhibitor	MyCancerGenomeClinicalTrial	clinically actionable,druggable genome,kinase,tyrosine kinase
W016	PDGFRA	SUNITINIB	n/a	TEND	clinically actionable,druggable genome,kinase,tyrosine kinase
W016	PDGFRA	SUNITINIB	n/a	TdgClinicalTrial	clinically actionable,druggable genome,kinase,tyrosine kinase
W016	PDGFRA	TANDUTINIB	inhibitor	MyCancerGenome	clinically actionable,druggable genome,kinase,tyrosine kinase
W016	PDGFRA	TELATINIB	n/a	TdgClinicalTrial	clinically actionable,druggable genome,kinase,tyrosine kinase
W016	PDGFRA	VATALANIB	n/a	TdgClinicalTrial	clinically actionable,druggable genome,kinase,tyrosine kinase
W016	PDHA1	CPI-613	n/a	TdgClinicalTrial
W016	PIK3C2A	GDC-0941	inhibitor	MyCancerGenome	druggable genome,kinase,phosphatidylinositol 3 kinase
W016	PIK3C2A	GDC-0980	inhibitor	MyCancerGenome	druggable genome,kinase,phosphatidylinositol 3 kinase
W016	PIK3C2A	GSK2636771	inhibitor	MyCancerGenome	druggable genome,kinase,phosphatidylinositol 3 kinase
W016	PIK3C2A	PI-103	inhibitor	MyCancerGenome	druggable genome,kinase,phosphatidylinositol 3 kinase
W016	PIK3C2A	PKI-587	inhibitor	MyCancerGenome	druggable genome,kinase,phosphatidylinositol 3 kinase
W016	PIK3C2A	SF1126	inhibitor	MyCancerGenome	druggable genome,kinase,phosphatidylinositol 3 kinase
W016	PIK3C2A	SOPHORETIN	inhibitor	MyCancerGenome	druggable genome,kinase,phosphatidylinositol 3 kinase
W016	PIK3C2A	XL147	inhibitor	MyCancerGenome	druggable genome,kinase,phosphatidylinositol 3 kinase
W016	PIK3C2B	GDC-0941	inhibitor	MyCancerGenome	druggable genome,kinase,lipid kinase,phosphatidylinositol 3 kinase
W016	PIK3C2B	GDC-0980	inhibitor	MyCancerGenome	druggable genome,kinase,lipid kinase,phosphatidylinositol 3 kinase
W016	PIK3C2B	GSK2636771	inhibitor	MyCancerGenome	druggable genome,kinase,lipid kinase,phosphatidylinositol 3 kinase
W016	PIK3C2B	PI-103	inhibitor	MyCancerGenome	druggable genome,kinase,lipid kinase,phosphatidylinositol 3 kinase
W016	PIK3C2B	PKI-587	inhibitor	MyCancerGenome	druggable genome,kinase,lipid kinase,phosphatidylinositol 3 kinase
W016	PIK3C2B	SF1126	inhibitor	MyCancerGenome	druggable genome,kinase,lipid kinase,phosphatidylinositol 3 kinase
W016	PIK3C2B	SOPHORETIN	inhibitor	MyCancerGenome	druggable genome,kinase,lipid kinase,phosphatidylinositol 3 kinase
W016	PIK3C2B	XL147	inhibitor	MyCancerGenome	druggable genome,kinase,lipid kinase,phosphatidylinositol 3 kinase
W016	PIK3C3	GDC-0941	inhibitor	MyCancerGenome	clinically actionable,druggable genome,kinase,phosphatidylinositol 3 kinase,tumor suppressor
W016	PIK3C3	GDC-0980	inhibitor	MyCancerGenome	clinically actionable,druggable genome,kinase,phosphatidylinositol 3 kinase,tumor suppressor
W016	PIK3C3	GSK2636771	inhibitor	MyCancerGenome	clinically actionable,druggable genome,kinase,phosphatidylinositol 3 kinase,tumor suppressor
W016	PIK3C3	PI-103	inhibitor	MyCancerGenome	clinically actionable,druggable genome,kinase,phosphatidylinositol 3 kinase,tumor suppressor
W016	PIK3C3	PKI-587	inhibitor	MyCancerGenome	clinically actionable,druggable genome,kinase,phosphatidylinositol 3 kinase,tumor suppressor
W016	PIK3C3	SF1126	inhibitor	MyCancerGenome	clinically actionable,druggable genome,kinase,phosphatidylinositol 3 kinase,tumor suppressor
W016	PIK3C3	SF1126	n/a	TdgClinicalTrial	clinically actionable,druggable genome,kinase,phosphatidylinositol 3 kinase,tumor suppressor
W016	PIK3C3	SOPHORETIN	inhibitor	MyCancerGenome	clinically actionable,druggable genome,kinase,phosphatidylinositol 3 kinase,tumor suppressor
W016	PIK3C3	XL147	inhibitor	MyCancerGenome	clinically actionable,druggable genome,kinase,phosphatidylinositol 3 kinase,tumor suppressor
W016	PIK3CA	EVEROLIMUS	n/a	ClearityFoundationBiomarkers	clinically actionable,druggable genome,kinase,phosphatidylinositol 3 kinase,serine threonine kinase
W016	PIK3CA	GDC-0032	inhibitor	MyCancerGenome	clinically actionable,druggable genome,kinase,phosphatidylinositol 3 kinase,serine threonine kinase
W016	PIK3CA	GDC-0941	inhibitor	MyCancerGenome	clinically actionable,druggable genome,kinase,phosphatidylinositol 3 kinase,serine threonine kinase
W016	PIK3CA	GDC-0941	inhibitor	TALC	clinically actionable,druggable genome,kinase,phosphatidylinositol 3 kinase,serine threonine kinase
W016	PIK3CA	GDC-0980	inhibitor	MyCancerGenome	clinically actionable,druggable genome,kinase,phosphatidylinositol 3 kinase,serine threonine kinase
W016	PIK3CA	GSK2126458	inhibitor	MyCancerGenomeClinicalTrial	clinically actionable,druggable genome,kinase,phosphatidylinositol 3 kinase,serine threonine kinase
W016	PIK3CA	GSK2126458	n/a	ClearityFoundationBiomarkers	clinically actionable,druggable genome,kinase,phosphatidylinositol 3 kinase,serine threonine kinase
W016	PIK3CA	GSK2636771	inhibitor	MyCancerGenome	clinically actionable,druggable genome,kinase,phosphatidylinositol 3 kinase,serine threonine kinase
W016	PIK3CA	INK-1117	inhibitor	MyCancerGenome	clinically actionable,druggable genome,kinase,phosphatidylinositol 3 kinase,serine threonine kinase
W016	PIK3CA	NVP-BGT226	inhibitor	TALC	clinically actionable,druggable genome,kinase,phosphatidylinositol 3 kinase,serine threonine kinase
W016	PIK3CA	PF-04691502	inhibitor	TALC	clinically actionable,druggable genome,kinase,phosphatidylinositol 3 kinase,serine threonine kinase
W016	PIK3CA	PF-04691502	n/a	ClearityFoundationBiomarkers	clinically actionable,druggable genome,kinase,phosphatidylinositol 3 kinase,serine threonine kinase
W016	PIK3CA	PI-103	inhibitor	MyCancerGenome	clinically actionable,druggable genome,kinase,phosphatidylinositol 3 kinase,serine threonine kinase
W016	PIK3CA	PKI-587	inhibitor	MyCancerGenome	clinically actionable,druggable genome,kinase,phosphatidylinositol 3 kinase,serine threonine kinase
W016	PIK3CA	PKI-587	inhibitor	MyCancerGenomeClinicalTrial	clinically actionable,druggable genome,kinase,phosphatidylinositol 3 kinase,serine threonine kinase
W016	PIK3CA	RIGOSERTIB	n/a	TdgClinicalTrial	clinically actionable,druggable genome,kinase,phosphatidylinositol 3 kinase,serine threonine kinase
W016	PIK3CA	SF1126	inhibitor	MyCancerGenome	clinically actionable,druggable genome,kinase,phosphatidylinositol 3 kinase,serine threonine kinase
W016	PIK3CA	SF1126	n/a	TdgClinicalTrial	clinically actionable,druggable genome,kinase,phosphatidylinositol 3 kinase,serine threonine kinase
W016	PIK3CA	SOPHORETIN	inhibitor	MyCancerGenome	clinically actionable,druggable genome,kinase,phosphatidylinositol 3 kinase,serine threonine kinase
W016	PIK3CA	TEMSIROLIMUS	n/a	ClearityFoundationBiomarkers	clinically actionable,druggable genome,kinase,phosphatidylinositol 3 kinase,serine threonine kinase
W016	PIK3CA	XL147	inhibitor	MyCancerGenome	clinically actionable,druggable genome,kinase,phosphatidylinositol 3 kinase,serine threonine kinase
W016	PIK3CA	XL147	inhibitor	TALC	clinically actionable,druggable genome,kinase,phosphatidylinositol 3 kinase,serine threonine kinase
W016	PIK3CA	XL147	n/a	DrugBank	clinically actionable,druggable genome,kinase,phosphatidylinositol 3 kinase,serine threonine kinase
W016	PIK3CA	XL765	inhibitor	CancerCommons	clinically actionable,druggable genome,kinase,phosphatidylinositol 3 kinase,serine threonine kinase
W016	PIK3CA	XL765	inhibitor	TALC	clinically actionable,druggable genome,kinase,phosphatidylinositol 3 kinase,serine threonine kinase
W016	PIK3CA	XL765	n/a	ClearityFoundationBiomarkers	clinically actionable,druggable genome,kinase,phosphatidylinositol 3 kinase,serine threonine kinase
W016	PIK3CA	XL765	n/a	DrugBank	clinically actionable,druggable genome,kinase,phosphatidylinositol 3 kinase,serine threonine kinase
W016	PIK3CA	XL765	n/a	TdgClinicalTrial	clinically actionable,druggable genome,kinase,phosphatidylinositol 3 kinase,serine threonine kinase
W016	PIK3CA	ZSTK474	n/a	ClearityFoundationBiomarkers	clinically actionable,druggable genome,kinase,phosphatidylinositol 3 kinase,serine threonine kinase
W016	PIK3CG	GDC-0941	inhibitor	MyCancerGenome	clinically actionable,druggable genome,kinase,phosphatidylinositol 3 kinase,serine threonine kinase
W016	PIK3CG	GDC-0980	inhibitor	MyCancerGenome	clinically actionable,druggable genome,kinase,phosphatidylinositol 3 kinase,serine threonine kinase
W016	PIK3CG	GSK2126458	inhibitor	MyCancerGenomeClinicalTrial	clinically actionable,druggable genome,kinase,phosphatidylinositol 3 kinase,serine threonine kinase
W016	PIK3CG	GSK2636771	inhibitor	MyCancerGenome	clinically actionable,druggable genome,kinase,phosphatidylinositol 3 kinase,serine threonine kinase
W016	PIK3CG	PI-103	inhibitor	MyCancerGenome	clinically actionable,druggable genome,kinase,phosphatidylinositol 3 kinase,serine threonine kinase
W016	PIK3CG	PKI-587	inhibitor	MyCancerGenome	clinically actionable,druggable genome,kinase,phosphatidylinositol 3 kinase,serine threonine kinase
W016	PIK3CG	PKI-587	inhibitor	MyCancerGenomeClinicalTrial	clinically actionable,druggable genome,kinase,phosphatidylinositol 3 kinase,serine threonine kinase
W016	PIK3CG	SF1126	inhibitor	MyCancerGenome	clinically actionable,druggable genome,kinase,phosphatidylinositol 3 kinase,serine threonine kinase
W016	PIK3CG	SF1126	n/a	TdgClinicalTrial	clinically actionable,druggable genome,kinase,phosphatidylinositol 3 kinase,serine threonine kinase
W016	PIK3CG	SOPHORETIN	inhibitor	MyCancerGenome	clinically actionable,druggable genome,kinase,phosphatidylinositol 3 kinase,serine threonine kinase
W016	PIK3CG	XL147	inhibitor	MyCancerGenome	clinically actionable,druggable genome,kinase,phosphatidylinositol 3 kinase,serine threonine kinase
W016	PIK3CG	XL765	n/a	DrugBank	clinically actionable,druggable genome,kinase,phosphatidylinositol 3 kinase,serine threonine kinase
W016	PIK3CG	XL765	n/a	TdgClinicalTrial	clinically actionable,druggable genome,kinase,phosphatidylinositol 3 kinase,serine threonine kinase
W016	PIK3R1	GDC-0941	inhibitor	MyCancerGenome	clinically actionable,druggable genome,kinase,phosphatidylinositol 3 kinase,transcription factor binding
W016	PIK3R1	GDC-0980	inhibitor	MyCancerGenome	clinically actionable,druggable genome,kinase,phosphatidylinositol 3 kinase,transcription factor binding
W016	PIK3R1	GSK2126458	inhibitor	MyCancerGenomeClinicalTrial	clinically actionable,druggable genome,kinase,phosphatidylinositol 3 kinase,transcription factor binding
W016	PIK3R1	GSK2126458	n/a	ClearityFoundationBiomarkers	clinically actionable,druggable genome,kinase,phosphatidylinositol 3 kinase,transcription factor binding
W016	PIK3R1	GSK2636771	inhibitor	MyCancerGenome	clinically actionable,druggable genome,kinase,phosphatidylinositol 3 kinase,transcription factor binding
W016	PIK3R1	PF-04691502	n/a	ClearityFoundationBiomarkers	clinically actionable,druggable genome,kinase,phosphatidylinositol 3 kinase,transcription factor binding
W016	PIK3R1	PI-103	inhibitor	MyCancerGenome	clinically actionable,druggable genome,kinase,phosphatidylinositol 3 kinase,transcription factor binding
W016	PIK3R1	PKI-587	inhibitor	MyCancerGenome	clinically actionable,druggable genome,kinase,phosphatidylinositol 3 kinase,transcription factor binding
W016	PIK3R1	PKI-587	inhibitor	MyCancerGenomeClinicalTrial	clinically actionable,druggable genome,kinase,phosphatidylinositol 3 kinase,transcription factor binding
W016	PIK3R1	SF1126	inhibitor	MyCancerGenome	clinically actionable,druggable genome,kinase,phosphatidylinositol 3 kinase,transcription factor binding
W016	PIK3R1	SF1126	n/a	DrugBank	clinically actionable,druggable genome,kinase,phosphatidylinositol 3 kinase,transcription factor binding
W016	PIK3R1	SOPHORETIN	inhibitor	MyCancerGenome	clinically actionable,druggable genome,kinase,phosphatidylinositol 3 kinase,transcription factor binding
W016	PIK3R1	XL147	inhibitor	MyCancerGenome	clinically actionable,druggable genome,kinase,phosphatidylinositol 3 kinase,transcription factor binding
W016	PIK3R1	XL765	n/a	ClearityFoundationBiomarkers	clinically actionable,druggable genome,kinase,phosphatidylinositol 3 kinase,transcription factor binding
W016	PIK3R1	ZSTK474	n/a	ClearityFoundationBiomarkers	clinically actionable,druggable genome,kinase,phosphatidylinositol 3 kinase,transcription factor binding
W016	POLB	CYTARABINE	inhibitor	DrugBank	dna repair
W016	POLB	CYTARABINE	n/a	TEND	dna repair
W016	POLB	CYTARABINE	n/a	TdgClinicalTrial	dna repair
W016	PSMC3	BORTEZOMIB	other/unknown	MyCancerGenome	transcription factor binding,tumor suppressor
W016	PSMC3	CARFILZOMIB	other/unknown	MyCancerGenome	transcription factor binding,tumor suppressor
W016	PSMD10	BORTEZOMIB	other/unknown	MyCancerGenome	transcription factor binding,tumor suppressor
W016	PSMD10	CARFILZOMIB	other/unknown	MyCancerGenome	transcription factor binding,tumor suppressor
W016	VEGFC	ENDOSTATIN (84-114)-NH2 (JKC367)	inhibitor	MyCancerGenomeClinicalTrial	drug resistance,growth factor
W016	VEGFC	LENALIDOMIDE	n/a	ClearityFoundationClinicalTrial	drug resistance,growth factor
W016	VEGFC	SORAFENIB TOSYLATE	inhibitor	MyCancerGenomeClinicalTrial	drug resistance,growth factor
W059	PARP1	OLAPARIB	inhibitor	TALC	clinically actionable,dna repair,druggable genome,transcription factor binding,transcription factor complex
W059	PARP1	OLAPARIB	n/a	ClearityFoundationClinicalTrial	clinically actionable,dna repair,druggable genome,transcription factor binding,transcription factor complex
W059	PARP1	OLAPARIB	other/unknown	MyCancerGenome	clinically actionable,dna repair,druggable genome,transcription factor binding,transcription factor complex
W059	PARP1	RUCAPARIB	n/a	ClearityFoundationClinicalTrial	clinically actionable,dna repair,druggable genome,transcription factor binding,transcription factor complex
W059	PARP1	RUCAPARIB	other/unknown	MyCancerGenome	clinically actionable,dna repair,druggable genome,transcription factor binding,transcription factor complex
W059	PARP1	VELIPARIB	inhibitor	MyCancerGenomeClinicalTrial	clinically actionable,dna repair,druggable genome,transcription factor binding,transcription factor complex
W059	PARP1	VELIPARIB	inhibitor	TALC	clinically actionable,dna repair,druggable genome,transcription factor binding,transcription factor complex
W059	PARP1	VELIPARIB	n/a	ClearityFoundationClinicalTrial	clinically actionable,dna repair,druggable genome,transcription factor binding,transcription factor complex
W059	PARP1	VELIPARIB	other/unknown	MyCancerGenome	clinically actionable,dna repair,druggable genome,transcription factor binding,transcription factor complex
W059	PIK3CA	EVEROLIMUS	n/a	ClearityFoundationBiomarkers	clinically actionable,druggable genome,kinase,phosphatidylinositol 3 kinase,serine threonine kinase
W059	PIK3CA	GDC-0032	inhibitor	MyCancerGenome	clinically actionable,druggable genome,kinase,phosphatidylinositol 3 kinase,serine threonine kinase
W059	PIK3CA	GDC-0941	inhibitor	MyCancerGenome	clinically actionable,druggable genome,kinase,phosphatidylinositol 3 kinase,serine threonine kinase
W059	PIK3CA	GDC-0941	inhibitor	TALC	clinically actionable,druggable genome,kinase,phosphatidylinositol 3 kinase,serine threonine kinase
W059	PIK3CA	GDC-0980	inhibitor	MyCancerGenome	clinically actionable,druggable genome,kinase,phosphatidylinositol 3 kinase,serine threonine kinase
W059	PIK3CA	GSK2126458	inhibitor	MyCancerGenomeClinicalTrial	clinically actionable,druggable genome,kinase,phosphatidylinositol 3 kinase,serine threonine kinase
W059	PIK3CA	GSK2126458	n/a	ClearityFoundationBiomarkers	clinically actionable,druggable genome,kinase,phosphatidylinositol 3 kinase,serine threonine kinase
W059	PIK3CA	GSK2636771	inhibitor	MyCancerGenome	clinically actionable,druggable genome,kinase,phosphatidylinositol 3 kinase,serine threonine kinase
W059	PIK3CA	INK-1117	inhibitor	MyCancerGenome	clinically actionable,druggable genome,kinase,phosphatidylinositol 3 kinase,serine threonine kinase
W059	PIK3CA	NVP-BGT226	inhibitor	TALC	clinically actionable,druggable genome,kinase,phosphatidylinositol 3 kinase,serine threonine kinase
W059	PIK3CA	PF-04691502	inhibitor	TALC	clinically actionable,druggable genome,kinase,phosphatidylinositol 3 kinase,serine threonine kinase
W059	PIK3CA	PF-04691502	n/a	ClearityFoundationBiomarkers	clinically actionable,druggable genome,kinase,phosphatidylinositol 3 kinase,serine threonine kinase
W059	PIK3CA	PI-103	inhibitor	MyCancerGenome	clinically actionable,druggable genome,kinase,phosphatidylinositol 3 kinase,serine threonine kinase
W059	PIK3CA	PKI-587	inhibitor	MyCancerGenome	clinically actionable,druggable genome,kinase,phosphatidylinositol 3 kinase,serine threonine kinase
W059	PIK3CA	PKI-587	inhibitor	MyCancerGenomeClinicalTrial	clinically actionable,druggable genome,kinase,phosphatidylinositol 3 kinase,serine threonine kinase
W059	PIK3CA	RIGOSERTIB	n/a	TdgClinicalTrial	clinically actionable,druggable genome,kinase,phosphatidylinositol 3 kinase,serine threonine kinase
W059	PIK3CA	SF1126	inhibitor	MyCancerGenome	clinically actionable,druggable genome,kinase,phosphatidylinositol 3 kinase,serine threonine kinase
W059	PIK3CA	SF1126	n/a	TdgClinicalTrial	clinically actionable,druggable genome,kinase,phosphatidylinositol 3 kinase,serine threonine kinase
W059	PIK3CA	SOPHORETIN	inhibitor	MyCancerGenome	clinically actionable,druggable genome,kinase,phosphatidylinositol 3 kinase,serine threonine kinase
W059	PIK3CA	TEMSIROLIMUS	n/a	ClearityFoundationBiomarkers	clinically actionable,druggable genome,kinase,phosphatidylinositol 3 kinase,serine threonine kinase
W059	PIK3CA	XL147	inhibitor	MyCancerGenome	clinically actionable,druggable genome,kinase,phosphatidylinositol 3 kinase,serine threonine kinase
W059	PIK3CA	XL147	inhibitor	TALC	clinically actionable,druggable genome,kinase,phosphatidylinositol 3 kinase,serine threonine kinase
W059	PIK3CA	XL147	n/a	DrugBank	clinically actionable,druggable genome,kinase,phosphatidylinositol 3 kinase,serine threonine kinase
W059	PIK3CA	XL765	inhibitor	CancerCommons	clinically actionable,druggable genome,kinase,phosphatidylinositol 3 kinase,serine threonine kinase
W059	PIK3CA	XL765	inhibitor	TALC	clinically actionable,druggable genome,kinase,phosphatidylinositol 3 kinase,serine threonine kinase
W059	PIK3CA	XL765	n/a	ClearityFoundationBiomarkers	clinically actionable,druggable genome,kinase,phosphatidylinositol 3 kinase,serine threonine kinase
W059	PIK3CA	XL765	n/a	DrugBank	clinically actionable,druggable genome,kinase,phosphatidylinositol 3 kinase,serine threonine kinase
W059	PIK3CA	XL765	n/a	TdgClinicalTrial	clinically actionable,druggable genome,kinase,phosphatidylinositol 3 kinase,serine threonine kinase
W059	PIK3CA	ZSTK474	n/a	ClearityFoundationBiomarkers	clinically actionable,druggable genome,kinase,phosphatidylinositol 3 kinase,serine threonine kinase
W059	TUBA3C	EPOTHILONE B	n/a	DrugBank	druggable genome
B103	ABCB1	ELACRIDAR	n/a	DrugBank	abc transporter,cell surface,drug resistance,druggable genome,transporter
B103	ABCB1	TESMILIFENE	inducer	DrugBank	abc transporter,cell surface,drug resistance,druggable genome,transporter
B103	EGFR	AEE 788	inhibitor	TALC	cell surface,clinically actionable,druggable genome,kinase,serine threonine kinase,tumor suppressor,tyrosine kinase
B103	EGFR	AFATINIB	inhibitor	MyCancerGenome	cell surface,clinically actionable,druggable genome,kinase,serine threonine kinase,tumor suppressor,tyrosine kinase
B103	EGFR	AFATINIB	inhibitor	MyCancerGenomeClinicalTrial	cell surface,clinically actionable,druggable genome,kinase,serine threonine kinase,tumor suppressor,tyrosine kinase
B103	EGFR	AFATINIB	inhibitor	TALC	cell surface,clinically actionable,druggable genome,kinase,serine threonine kinase,tumor suppressor,tyrosine kinase
B103	EGFR	AFATINIB	n/a	TdgClinicalTrial	cell surface,clinically actionable,druggable genome,kinase,serine threonine kinase,tumor suppressor,tyrosine kinase
B103	EGFR	AKOS004227608	n/a	ClearityFoundationClinicalTrial	cell surface,clinically actionable,druggable genome,kinase,serine threonine kinase,tumor suppressor,tyrosine kinase
B103	EGFR	AP26113	inhibitor	MyCancerGenomeClinicalTrial	cell surface,clinically actionable,druggable genome,kinase,serine threonine kinase,tumor suppressor,tyrosine kinase
B103	EGFR	AZD8931	inhibitor	MyCancerGenome	cell surface,clinically actionable,druggable genome,kinase,serine threonine kinase,tumor suppressor,tyrosine kinase
B103	EGFR	BMS-599626	inhibitor	MyCancerGenome	cell surface,clinically actionable,druggable genome,kinase,serine threonine kinase,tumor suppressor,tyrosine kinase
B103	EGFR	BMS-599626	inhibitor	TALC	cell surface,clinically actionable,druggable genome,kinase,serine threonine kinase,tumor suppressor,tyrosine kinase
B103	EGFR	BMS-690514	inhibitor	TALC	cell surface,clinically actionable,druggable genome,kinase,serine threonine kinase,tumor suppressor,tyrosine kinase
B103	EGFR	CO-1686	inhibitor	MyCancerGenome	cell surface,clinically actionable,druggable genome,kinase,serine threonine kinase,tumor suppressor,tyrosine kinase
B103	EGFR	CUDC-101	inhibitor	TALC	cell surface,clinically actionable,druggable genome,kinase,serine threonine kinase,tumor suppressor,tyrosine kinase
B103	EGFR	CUDC-101	n/a	TdgClinicalTrial	cell surface,clinically actionable,druggable genome,kinase,serine threonine kinase,tumor suppressor,tyrosine kinase
B103	EGFR	DACOMITINIB	inhibitor	MyCancerGenome	cell surface,clinically actionable,druggable genome,kinase,serine threonine kinase,tumor suppressor,tyrosine kinase
B103	EGFR	DACOMITINIB	inhibitor	MyCancerGenomeClinicalTrial	cell surface,clinically actionable,druggable genome,kinase,serine threonine kinase,tumor suppressor,tyrosine kinase
B103	EGFR	DACOMITINIB	inhibitor	TALC	cell surface,clinically actionable,druggable genome,kinase,serine threonine kinase,tumor suppressor,tyrosine kinase
B103	EGFR	DACOMITINIB	n/a	TdgClinicalTrial	cell surface,clinically actionable,druggable genome,kinase,serine threonine kinase,tumor suppressor,tyrosine kinase
B103	EGFR	ERLOTINIB	inhibitor	CancerCommons	cell surface,clinically actionable,druggable genome,kinase,serine threonine kinase,tumor suppressor,tyrosine kinase
B103	EGFR	ERLOTINIB	inhibitor	MyCancerGenome	cell surface,clinically actionable,druggable genome,kinase,serine threonine kinase,tumor suppressor,tyrosine kinase
B103	EGFR	ERLOTINIB	inhibitor	TALC	cell surface,clinically actionable,druggable genome,kinase,serine threonine kinase,tumor suppressor,tyrosine kinase
B103	EGFR	ERLOTINIB	n/a	ClearityFoundationBiomarkers	cell surface,clinically actionable,druggable genome,kinase,serine threonine kinase,tumor suppressor,tyrosine kinase
B103	EGFR	ERLOTINIB	n/a	ClearityFoundationClinicalTrial	cell surface,clinically actionable,druggable genome,kinase,serine threonine kinase,tumor suppressor,tyrosine kinase
B103	EGFR	ERLOTINIB	n/a	TEND	cell surface,clinically actionable,druggable genome,kinase,serine threonine kinase,tumor suppressor,tyrosine kinase
B103	EGFR	ERLOTINIB	n/a	TdgClinicalTrial	cell surface,clinically actionable,druggable genome,kinase,serine threonine kinase,tumor suppressor,tyrosine kinase
B103	EGFR	ERLOTINIB HYDROCHLORIDE	inhibitor	MyCancerGenomeClinicalTrial	cell surface,clinically actionable,druggable genome,kinase,serine threonine kinase,tumor suppressor,tyrosine kinase
B103	EGFR	GEFITINIB	inhibitor	MyCancerGenome	cell surface,clinically actionable,druggable genome,kinase,serine threonine kinase,tumor suppressor,tyrosine kinase
B103	EGFR	GEFITINIB	inhibitor	MyCancerGenomeClinicalTrial	cell surface,clinically actionable,druggable genome,kinase,serine threonine kinase,tumor suppressor,tyrosine kinase
B103	EGFR	GEFITINIB	inhibitor	TALC	cell surface,clinically actionable,druggable genome,kinase,serine threonine kinase,tumor suppressor,tyrosine kinase
B103	EGFR	GEFITINIB	n/a	ClearityFoundationBiomarkers	cell surface,clinically actionable,druggable genome,kinase,serine threonine kinase,tumor suppressor,tyrosine kinase
B103	EGFR	GEFITINIB	n/a	TEND	cell surface,clinically actionable,druggable genome,kinase,serine threonine kinase,tumor suppressor,tyrosine kinase
B103	EGFR	GEFITINIB	n/a	TdgClinicalTrial	cell surface,clinically actionable,druggable genome,kinase,serine threonine kinase,tumor suppressor,tyrosine kinase
B103	EGFR	ICOTINIB	inhibitor	MyCancerGenome	cell surface,clinically actionable,druggable genome,kinase,serine threonine kinase,tumor suppressor,tyrosine kinase
B103	EGFR	ICOTINIB	inhibitor	MyCancerGenomeClinicalTrial	cell surface,clinically actionable,druggable genome,kinase,serine threonine kinase,tumor suppressor,tyrosine kinase
B103	EGFR	ICOTINIB	inhibitor	TALC	cell surface,clinically actionable,druggable genome,kinase,serine threonine kinase,tumor suppressor,tyrosine kinase
B103	EGFR	LAPATINIB	inhibitor	CancerCommons	cell surface,clinically actionable,druggable genome,kinase,serine threonine kinase,tumor suppressor,tyrosine kinase
B103	EGFR	LAPATINIB	n/a	ClearityFoundationClinicalTrial	cell surface,clinically actionable,druggable genome,kinase,serine threonine kinase,tumor suppressor,tyrosine kinase
B103	EGFR	LAPATINIB	n/a	TEND	cell surface,clinically actionable,druggable genome,kinase,serine threonine kinase,tumor suppressor,tyrosine kinase
B103	EGFR	LAPATINIB	n/a	TdgClinicalTrial	cell surface,clinically actionable,druggable genome,kinase,serine threonine kinase,tumor suppressor,tyrosine kinase
B103	EGFR	LAPATINIB DITOSYLATE	inhibitor	MyCancerGenomeClinicalTrial	cell surface,clinically actionable,druggable genome,kinase,serine threonine kinase,tumor suppressor,tyrosine kinase
B103	EGFR	MOMELOTINIB	inhibitor	TALC	cell surface,clinically actionable,druggable genome,kinase,serine threonine kinase,tumor suppressor,tyrosine kinase
B103	EGFR	NERATINIB	inhibitor	TALC	cell surface,clinically actionable,druggable genome,kinase,serine threonine kinase,tumor suppressor,tyrosine kinase
B103	EGFR	NERATINIB	n/a	TdgClinicalTrial	cell surface,clinically actionable,druggable genome,kinase,serine threonine kinase,tumor suppressor,tyrosine kinase
B103	EGFR	PELITINIB	inhibitor	MyCancerGenome	cell surface,clinically actionable,druggable genome,kinase,serine threonine kinase,tumor suppressor,tyrosine kinase
B103	EGFR	PELITINIB	inhibitor	TALC	cell surface,clinically actionable,druggable genome,kinase,serine threonine kinase,tumor suppressor,tyrosine kinase
B103	EGFR	POZIOTINIB	inhibitor	MyCancerGenomeClinicalTrial	cell surface,clinically actionable,druggable genome,kinase,serine threonine kinase,tumor suppressor,tyrosine kinase
B103	EGFR	VANDETANIB	inhibitor	MyCancerGenome	cell surface,clinically actionable,druggable genome,kinase,serine threonine kinase,tumor suppressor,tyrosine kinase
B103	EGFR	VANDETANIB	inhibitor	MyCancerGenomeClinicalTrial	cell surface,clinically actionable,druggable genome,kinase,serine threonine kinase,tumor suppressor,tyrosine kinase
B103	EGFR	VANDETANIB	inhibitor	TALC	cell surface,clinically actionable,druggable genome,kinase,serine threonine kinase,tumor suppressor,tyrosine kinase
B103	EGFR	VANDETANIB	n/a	ClearityFoundationBiomarkers	cell surface,clinically actionable,druggable genome,kinase,serine threonine kinase,tumor suppressor,tyrosine kinase
B103	EGFR	VANDETANIB	n/a	ClearityFoundationClinicalTrial	cell surface,clinically actionable,druggable genome,kinase,serine threonine kinase,tumor suppressor,tyrosine kinase
B103	EGFR	VANDETANIB	n/a	TdgClinicalTrial	cell surface,clinically actionable,druggable genome,kinase,serine threonine kinase,tumor suppressor,tyrosine kinase
B103	FLT1	1058137-23-7	inhibitor	MyCancerGenomeClinicalTrial	clinically actionable,druggable genome,kinase,tyrosine kinase
B103	FLT1	AXITINIB	inhibitor	CancerCommons	clinically actionable,druggable genome,kinase,tyrosine kinase
B103	FLT1	AXITINIB	inhibitor	MyCancerGenome	clinically actionable,druggable genome,kinase,tyrosine kinase
B103	FLT1	AXITINIB	inhibitor	MyCancerGenomeClinicalTrial	clinically actionable,druggable genome,kinase,tyrosine kinase
B103	FLT1	AXITINIB	inhibitor	TALC	clinically actionable,druggable genome,kinase,tyrosine kinase
B103	FLT1	AXITINIB	n/a	TdgClinicalTrial	clinically actionable,druggable genome,kinase,tyrosine kinase
B103	FLT1	CEDIRANIB	inhibitor	TALC	clinically actionable,druggable genome,kinase,tyrosine kinase
B103	FLT1	CEDIRANIB	n/a	ClearityFoundationClinicalTrial	clinically actionable,druggable genome,kinase,tyrosine kinase
B103	FLT1	CEDIRANIB	n/a	TdgClinicalTrial	clinically actionable,druggable genome,kinase,tyrosine kinase
B103	FLT1	DOVITINIB	inhibitor	CancerCommons	clinically actionable,druggable genome,kinase,tyrosine kinase
B103	FLT1	DOVITINIB	n/a	ClearityFoundationClinicalTrial	clinically actionable,druggable genome,kinase,tyrosine kinase
B103	FLT1	DOVITINIB	n/a	TdgClinicalTrial	clinically actionable,druggable genome,kinase,tyrosine kinase
B103	FLT1	ENMD 2076	n/a	ClearityFoundationClinicalTrial	clinically actionable,druggable genome,kinase,tyrosine kinase
B103	FLT1	ENMD-2076	inhibitor	MyCancerGenome	clinically actionable,druggable genome,kinase,tyrosine kinase
B103	FLT1	FORETINIB	inhibitor	MyCancerGenome	clinically actionable,druggable genome,kinase,tyrosine kinase
B103	FLT1	LENVATINIB	inhibitor	TALC	clinically actionable,druggable genome,kinase,tyrosine kinase
B103	FLT1	LENVATINIB	n/a	TdgClinicalTrial	clinically actionable,druggable genome,kinase,tyrosine kinase
B103	FLT1	LINIFANIB	inhibitor	MyCancerGenome	clinically actionable,druggable genome,kinase,tyrosine kinase
B103	FLT1	LINIFANIB	n/a	TdgClinicalTrial	clinically actionable,druggable genome,kinase,tyrosine kinase
B103	FLT1	MOTESANIB	inhibitor	MyCancerGenome	clinically actionable,druggable genome,kinase,tyrosine kinase
B103	FLT1	MOTESANIB	inhibitor	TALC	clinically actionable,druggable genome,kinase,tyrosine kinase
B103	FLT1	MOTESANIB	n/a	TdgClinicalTrial	clinically actionable,druggable genome,kinase,tyrosine kinase
B103	FLT1	NINTEDANIB	inhibitor	MyCancerGenome	clinically actionable,druggable genome,kinase,tyrosine kinase
B103	FLT1	NINTEDANIB	n/a	ClearityFoundationClinicalTrial	clinically actionable,druggable genome,kinase,tyrosine kinase
B103	FLT1	NINTEDANIB	n/a	TdgClinicalTrial	clinically actionable,druggable genome,kinase,tyrosine kinase
B103	FLT1	PAZOPANIB	inhibitor	MyCancerGenome	clinically actionable,druggable genome,kinase,tyrosine kinase
B103	FLT1	PAZOPANIB	inhibitor	MyCancerGenomeClinicalTrial	clinically actionable,druggable genome,kinase,tyrosine kinase
B103	FLT1	PAZOPANIB	inhibitor	TALC	clinically actionable,druggable genome,kinase,tyrosine kinase
B103	FLT1	PAZOPANIB	n/a	TdgClinicalTrial	clinically actionable,druggable genome,kinase,tyrosine kinase
B103	FLT1	REGORAFENIB	inhibitor	DrugBank	clinically actionable,druggable genome,kinase,tyrosine kinase
B103	FLT1	REGORAFENIB	inhibitor	MyCancerGenome	clinically actionable,druggable genome,kinase,tyrosine kinase
B103	FLT1	REGORAFENIB	inhibitor	MyCancerGenomeClinicalTrial	clinically actionable,druggable genome,kinase,tyrosine kinase
B103	FLT1	REGORAFENIB	inhibitor	TALC	clinically actionable,druggable genome,kinase,tyrosine kinase
B103	FLT1	SORAFENIB	inhibitor	DrugBank	clinically actionable,druggable genome,kinase,tyrosine kinase
B103	FLT1	SORAFENIB	inhibitor	MyCancerGenomeClinicalTrial	clinically actionable,druggable genome,kinase,tyrosine kinase
B103	FLT1	SORAFENIB TOSYLATE	inhibitor	MyCancerGenomeClinicalTrial	clinically actionable,druggable genome,kinase,tyrosine kinase
B103	FLT1	SUNITINIB	inhibitor	MyCancerGenomeClinicalTrial	clinically actionable,druggable genome,kinase,tyrosine kinase
B103	FLT1	SUNITINIB	inhibitor	TALC	clinically actionable,druggable genome,kinase,tyrosine kinase
B103	FLT1	SUNITINIB	n/a	TEND	clinically actionable,druggable genome,kinase,tyrosine kinase
B103	FLT1	SUNITINIB	n/a	TdgClinicalTrial	clinically actionable,druggable genome,kinase,tyrosine kinase
B103	FLT1	TELATINIB	n/a	TdgClinicalTrial	clinically actionable,druggable genome,kinase,tyrosine kinase
B103	FLT1	TIVOZANIB	inhibitor	MyCancerGenome	clinically actionable,druggable genome,kinase,tyrosine kinase
B103	FLT1	TIVOZANIB	inhibitor	TALC	clinically actionable,druggable genome,kinase,tyrosine kinase
B103	FLT1	TIVOZANIB	n/a	ClearityFoundationClinicalTrial	clinically actionable,druggable genome,kinase,tyrosine kinase
B103	FLT1	TIVOZANIB	n/a	TdgClinicalTrial	clinically actionable,druggable genome,kinase,tyrosine kinase
B103	FLT1	VANDETANIB	inhibitor	MyCancerGenomeClinicalTrial	clinically actionable,druggable genome,kinase,tyrosine kinase
B103	FLT1	VANDETANIB	n/a	ClearityFoundationClinicalTrial	clinically actionable,druggable genome,kinase,tyrosine kinase
B103	FLT1	VANDETANIB	n/a	TdgClinicalTrial	clinically actionable,druggable genome,kinase,tyrosine kinase
B103	FLT1	VATALANIB	inhibitor	MyCancerGenome	clinically actionable,druggable genome,kinase,tyrosine kinase
B103	FLT1	VATALANIB	inhibitor	TALC	clinically actionable,druggable genome,kinase,tyrosine kinase
B103	FLT1	VATALANIB	n/a	DrugBank	clinically actionable,druggable genome,kinase,tyrosine kinase
B103	FLT1	VATALANIB	n/a	TdgClinicalTrial	clinically actionable,druggable genome,kinase,tyrosine kinase
B103	FLT4	1058137-23-7	inhibitor	MyCancerGenomeClinicalTrial	clinically actionable,druggable genome,kinase,tyrosine kinase
B103	FLT4	AXITINIB	inhibitor	CancerCommons	clinically actionable,druggable genome,kinase,tyrosine kinase
B103	FLT4	AXITINIB	inhibitor	MyCancerGenome	clinically actionable,druggable genome,kinase,tyrosine kinase
B103	FLT4	AXITINIB	inhibitor	MyCancerGenomeClinicalTrial	clinically actionable,druggable genome,kinase,tyrosine kinase
B103	FLT4	AXITINIB	inhibitor	TALC	clinically actionable,druggable genome,kinase,tyrosine kinase
B103	FLT4	AXITINIB	n/a	TdgClinicalTrial	clinically actionable,druggable genome,kinase,tyrosine kinase
B103	FLT4	CEDIRANIB	inhibitor	TALC	clinically actionable,druggable genome,kinase,tyrosine kinase
B103	FLT4	CEDIRANIB	n/a	ClearityFoundationClinicalTrial	clinically actionable,druggable genome,kinase,tyrosine kinase
B103	FLT4	CEDIRANIB	n/a	TdgClinicalTrial	clinically actionable,druggable genome,kinase,tyrosine kinase
B103	FLT4	DOVITINIB	n/a	ClearityFoundationClinicalTrial	clinically actionable,druggable genome,kinase,tyrosine kinase
B103	FLT4	DOVITINIB	n/a	TdgClinicalTrial	clinically actionable,druggable genome,kinase,tyrosine kinase
B103	FLT4	ENMD 2076	n/a	ClearityFoundationClinicalTrial	clinically actionable,druggable genome,kinase,tyrosine kinase
B103	FLT4	ENMD-2076	inhibitor	MyCancerGenome	clinically actionable,druggable genome,kinase,tyrosine kinase
B103	FLT4	ENMD-2076	n/a	TdgClinicalTrial	clinically actionable,druggable genome,kinase,tyrosine kinase
B103	FLT4	FORETINIB	inhibitor	MyCancerGenome	clinically actionable,druggable genome,kinase,tyrosine kinase
B103	FLT4	LENVATINIB	inhibitor	MyCancerGenome	clinically actionable,druggable genome,kinase,tyrosine kinase
B103	FLT4	LENVATINIB	inhibitor	TALC	clinically actionable,druggable genome,kinase,tyrosine kinase
B103	FLT4	LENVATINIB	n/a	TdgClinicalTrial	clinically actionable,druggable genome,kinase,tyrosine kinase
B103	FLT4	LINIFANIB	inhibitor	MyCancerGenome	clinically actionable,druggable genome,kinase,tyrosine kinase
B103	FLT4	LINIFANIB	n/a	TdgClinicalTrial	clinically actionable,druggable genome,kinase,tyrosine kinase
B103	FLT4	MOTESANIB	inhibitor	MyCancerGenome	clinically actionable,druggable genome,kinase,tyrosine kinase
B103	FLT4	MOTESANIB	inhibitor	TALC	clinically actionable,druggable genome,kinase,tyrosine kinase
B103	FLT4	MOTESANIB	n/a	TdgClinicalTrial	clinically actionable,druggable genome,kinase,tyrosine kinase
B103	FLT4	NINTEDANIB	inhibitor	MyCancerGenome	clinically actionable,druggable genome,kinase,tyrosine kinase
B103	FLT4	NINTEDANIB	n/a	ClearityFoundationClinicalTrial	clinically actionable,druggable genome,kinase,tyrosine kinase
B103	FLT4	NINTEDANIB	n/a	TdgClinicalTrial	clinically actionable,druggable genome,kinase,tyrosine kinase
B103	FLT4	PAZOPANIB	inhibitor	MyCancerGenome	clinically actionable,druggable genome,kinase,tyrosine kinase
B103	FLT4	PAZOPANIB	inhibitor	MyCancerGenomeClinicalTrial	clinically actionable,druggable genome,kinase,tyrosine kinase
B103	FLT4	PAZOPANIB	inhibitor	TALC	clinically actionable,druggable genome,kinase,tyrosine kinase
B103	FLT4	PAZOPANIB	n/a	TdgClinicalTrial	clinically actionable,druggable genome,kinase,tyrosine kinase
B103	FLT4	REGORAFENIB	inhibitor	DrugBank	clinically actionable,druggable genome,kinase,tyrosine kinase
B103	FLT4	REGORAFENIB	inhibitor	MyCancerGenome	clinically actionable,druggable genome,kinase,tyrosine kinase
B103	FLT4	REGORAFENIB	inhibitor	MyCancerGenomeClinicalTrial	clinically actionable,druggable genome,kinase,tyrosine kinase
B103	FLT4	REGORAFENIB	inhibitor	TALC	clinically actionable,druggable genome,kinase,tyrosine kinase
B103	FLT4	SORAFENIB	antagonist	DrugBank	clinically actionable,druggable genome,kinase,tyrosine kinase
B103	FLT4	SORAFENIB	inhibitor	MyCancerGenomeClinicalTrial	clinically actionable,druggable genome,kinase,tyrosine kinase
B103	FLT4	SORAFENIB	inhibitor	TALC	clinically actionable,druggable genome,kinase,tyrosine kinase
B103	FLT4	SORAFENIB	n/a	TEND	clinically actionable,druggable genome,kinase,tyrosine kinase
B103	FLT4	SORAFENIB	n/a	TdgClinicalTrial	clinically actionable,druggable genome,kinase,tyrosine kinase
B103	FLT4	SORAFENIB TOSYLATE	inhibitor	MyCancerGenomeClinicalTrial	clinically actionable,druggable genome,kinase,tyrosine kinase
B103	FLT4	SUNITINIB	inhibitor	MyCancerGenomeClinicalTrial	clinically actionable,druggable genome,kinase,tyrosine kinase
B103	FLT4	SUNITINIB	inhibitor	TALC	clinically actionable,druggable genome,kinase,tyrosine kinase
B103	FLT4	SUNITINIB	n/a	TEND	clinically actionable,druggable genome,kinase,tyrosine kinase
B103	FLT4	SUNITINIB	n/a	TdgClinicalTrial	clinically actionable,druggable genome,kinase,tyrosine kinase
B103	FLT4	TELATINIB	inhibitor	MyCancerGenome	clinically actionable,druggable genome,kinase,tyrosine kinase
B103	FLT4	TELATINIB	inhibitor	TALC	clinically actionable,druggable genome,kinase,tyrosine kinase
B103	FLT4	TELATINIB	n/a	TdgClinicalTrial	clinically actionable,druggable genome,kinase,tyrosine kinase
B103	FLT4	TIVOZANIB	inhibitor	MyCancerGenome	clinically actionable,druggable genome,kinase,tyrosine kinase
B103	FLT4	TIVOZANIB	inhibitor	TALC	clinically actionable,druggable genome,kinase,tyrosine kinase
B103	FLT4	TIVOZANIB	n/a	ClearityFoundationClinicalTrial	clinically actionable,druggable genome,kinase,tyrosine kinase
B103	FLT4	TIVOZANIB	n/a	TdgClinicalTrial	clinically actionable,druggable genome,kinase,tyrosine kinase
B103	FLT4	VANDETANIB	inhibitor	MyCancerGenomeClinicalTrial	clinically actionable,druggable genome,kinase,tyrosine kinase
B103	FLT4	VANDETANIB	inhibitor	TALC	clinically actionable,druggable genome,kinase,tyrosine kinase
B103	FLT4	VANDETANIB	n/a	ClearityFoundationClinicalTrial	clinically actionable,druggable genome,kinase,tyrosine kinase
B103	FLT4	VANDETANIB	n/a	TdgClinicalTrial	clinically actionable,druggable genome,kinase,tyrosine kinase
B103	FLT4	VATALANIB	inhibitor	MyCancerGenome	clinically actionable,druggable genome,kinase,tyrosine kinase
B103	FLT4	VATALANIB	n/a	DrugBank	clinically actionable,druggable genome,kinase,tyrosine kinase
B103	FLT4	VATALANIB	n/a	TdgClinicalTrial	clinically actionable,druggable genome,kinase,tyrosine kinase
